# Supplementary material
Source: PubMed Central journal article supplement (PMC4041416)
Supplement: supp_gku241_nar-00080-survey-d-2014-File009.pdf [file supp_gku241_nar-00080-survey-d-2014-File009.pdf]

292492856\_Nitrosococcus\_halophilus\_Nc4  
34541577\_Porphyrionomas\_gingivalis\_W83  
88602029\_Methanospirillum\_hungatei\_JF-1  
325980970\_Nitrosomonas\_sp.\_AL212  
269798874\_Veillonella\_parvula\_DSM\_2008  
332668016\_Halicosmenobacter\_hydrossis\_DSM\_1100  
379728404\_Saprosira\_grandis\_str\_Lewin  
327314603\_Prevotella\_denticola\_F0289  
392395717\_Flexibacter\_litoralis\_DSM\_6794  
150398872\_Methanococcus\_vannielii\_SB  
150401497\_Methanococcus\_aeolicus\_Nankai-3  
284040851\_Spirosoma\_linguale\_DSM\_74  
257125862\_Leptotrichia\_buccalis\_C-1013-b  
21226661\_Methanosarcina\_mazei\_Gol  
218961577\_Candidatus\_Cloacamonas\_acidaminovorans\_str\_Evry  
319790504\_Thermovibrio\_ammonificans\_HB-1  
337288662\_Thermodesulfobacterium\_geofontis\_OPF15  
20094748\_Methanopyrus\_kandleri\_AV19  
386750121\_Helicobacter\_cetorum\_MIT\_00-7128  
126465226\_Staphylothermus\_marinus\_P1  
170290046\_Candidatus\_Korarchaeum\_cryptofilum\_OPF8  
385805115\_Pervidiococcus\_fontis\_Kam94  
15898245\_Sulfolobus\_solfataricus\_P2  
156937921\_Igmicoccus\_hospitalis\_KIM4-I  
124027534\_Hyperthermus\_butylicus\_DSM\_5456  
118431380\_Aeropyrum\_pernix\_K1  
305663330\_Igmicoccus\_distributa\_DSM\_14429  
305663330\_Igmicoccus\_aggregans\_DSM\_17430  
347523053\_Pyrobolobus\_fumarii\_LA  
302347808\_Acidilobus\_saccharovorans\_345-15  
218884093\_Desulfurococcus\_kamchatkensis\_1221n  
389861365\_Thermogladius\_cellulolyticus\_1633  
15898286\_Sulfolobus\_solfataricus\_P2  
15922975\_Sulfolobus\_tokodaii\_str\_7  
18311772\_Pyrobaculum\_aerophilum\_str\_IM2  
18311699\_Pyrobaculum\_aerophilum\_str\_IM2  
54296139\_Legionella\_pneumophila\_str\_Paris  
34557933\_Wolinella\_succinogenes\_DSM\_1740  
118497553\_Franciella\_novicaida\_U12  
328954440\_Desulfobacca\_acetoxidans\_DSM\_11109  
408403000\_Candidatus\_Nitrososphaera\_gargensis\_Ga9-2  
330509017\_Methanoseta\_coccilli\_GP6  
148656004\_Roseiflexus\_sp\_RS-1  
386854797\_Deinoococcus\_gobienis\_I-0  
167628642\_Helicobacterium\_moderaticulum\_Icel  
148642083\_Methanobrevibacter\_smithii\_ATCC\_35061  
288560430\_Methanobrevibacter\_ruminantium\_M1  
11499462\_Archaeoglobus\_fulgidus\_DSM\_4304  
383319612\_Methanocella\_conradii\_HZ254  
294676823\_Rhodobacter\_capsulatus\_SB\_1003  
302343124\_Desulfarculus\_barsii\_DSM\_2075  
389875622\_Tistrella\_mobilis\_KA081020-065  
374998939\_Azospirillum\_lipoferum\_4B  
288957883\_Azospirillum\_sp\_B510  
116627764\_Streptococcus\_thermophilus\_LMD-9  
15609954\_Mycobacterium\_tuberculosis\_H37Rv  
348026605\_Megasphaera\_elsdeni\_DSM\_20460  
296133514\_Thermicola\_potens\_JR  
114567264\_Syntrophomonas\_wolfiei\_subsp\_wolfiei\_str\_Goettingen  
332296542\_Thermodesulfobium\_narungense\_DSM\_14796  
215442809\_Cyanothece\_sp\_PCC\_7424  
17289893\_Nostoc\_sp\_7120  
119357853\_Chlorobium\_phaeobacteroides\_DSM\_266  
119357846\_Chlorobium\_phaeobacteroides\_DSM\_266  
336116789\_Microcoulunium\_phosphovorus\_NM-1  
37677204\_Vibrio\_vulnificus\_YJ016  
154250301\_Pervidobacterium\_nodosum\_Rt17-B1  
38505760\_Synechocystis\_sp\_PCC\_6803  
83592490\_Rhodospirillum\_rubrum\_ATCC\_11170  
261415948\_Fibrobacter\_succinigenes\_subsp\_succinigenes\_S85  
76802276\_Natronomonas\_pharaonis\_DSM\_2160  
312114617\_Rhodomicrobium\_vannielii\_ATCC\_17100  
219683006\_Bifidobacterium\_animalis\_subsp\_lactis\_AD011  
116748794\_Syntrophobacter\_fumaroxidans\_MPOB  
317051217\_Desulfurispirillum\_indicum\_S5  
328949009\_Treponema\_succinifaciens\_DSM\_2489  
333996012\_Treponema\_azotonutricium\_ZAS-9  
313673559\_Calditerrivibrio\_nitroreducens\_DSM\_19672  
218961167\_Candidatus\_Cloacamonas\_acidaminovorans\_str\_Evry  
294828260\_Leptospira\_interrogans\_serovar\_Lai\_str\_56601  
347756303\_Candidatus\_Chloracidobacterium\_thermophilum\_B  
162457462\_Sorangium\_cellulosum\_So\_c656  
86742032\_Frankia\_sp\_Cc13  
433631663\_Mycobacterium\_canettii\_CIPT\_140070010  
15612904\_Bacillus\_halodurans\_C-125  
108763792\_Myoxococcus\_xanthus\_DK\_1622  
344996859\_Caldicellulosiruptor\_lactoaceticus\_6A  
85858452\_Syntrophus\_aciditrophicus\_SB  
148657121\_Roseiflexus\_sp\_RS-1  
159898907\_Herpetosiphon\_aurantiacus\_DSM\_785  
17227877\_Nostoc\_sp\_PCC\_7120  
268318378\_Rhodothermus\_marinus\_DSM\_4252  
55978328\_Thermus\_thermophilus\_HB8  
7622675\_Truerpera\_radiovictrix\_DSM\_17093  
328953000\_Desulfobacca\_acetoxidans\_DSM\_11109









288957883\_Azospirillum\_sp.\_B510  
116627764\_Streptococcus\_thermophilus\_LMD-9  
156099554\_Mycobacterium\_tuberculosis\_H37Rv  
348026605\_Megasphaera\_elsdenii\_DSM\_20460  
296133514\_Thermicola\_potens\_JR1  
114567264\_Syntrophomonas\_wolfei\_subsp\_wolfei\_str\_Goettingen  
332296542\_Thermodesulfobium\_narugense\_DSM\_14796  
218442829\_Cyanotheca\_sp.\_PCC\_7424  
1728961\_Nostoc\_sp.\_PCC\_7120  
119357853\_Chlorobium\_phaeobacteroides\_DSM\_266  
119357846\_Chlorobium\_phaeobacteroides\_DSM\_266  
336116789\_Microtholunus\_phosphovorus\_NM-1  
37677204\_Vibrio\_vulnificus\_YJ016  
154250301\_Ferrihydrobacterium\_nodosum\_Rt17-B1  
38505760\_Synechocystis\_sp.\_PCC\_6803  
83592490\_Rhodospirillum\_rubrum\_ATCC\_11170  
261415948\_Fibrobacter\_succinigenes\_subsp\_succinigenes\_S85  
76802276\_Natronomonas\_pharaonis\_DSM\_2160  
312114617\_Rhodomicrobium\_vannielii\_ATCC\_17100  
219683006\_Bifidobacterium\_animalis\_subsp\_lactis\_AD011  
116748794\_Syntrophobacter\_fumaroxidans\_MPOB  
317051217\_Desulfuripirillum\_indicum\_S5  
328949009\_Treponema\_succinifaciens\_DSM\_2489  
333996012\_Treponema\_aotonicum\_ZAS-9  
313673559\_Calditerrivibrio\_nitroreducens\_DSM\_19672  
218961167\_Candidatus\_Chloracomonas\_acidaminovorans\_str\_Evry  
29488260\_Lentocoptira\_intervorans\_serovar\_Lai\_str\_56601  
347756303\_Candidatus\_Chloracidobacterium\_thermophilum\_B  
162457462\_Sorangium\_cellulosum\_So\_c656  
86742032\_Frankia\_sp.\_Cc13  
433631663\_Mycobacterium\_canettii\_CIPT\_140070010  
15612904\_Bacillus\_halodurans\_C-125  
108763792\_Mycococcus\_xanthus\_DK\_1622  
344996859\_Caldicellulosiruptor\_lactooacetatus\_6A  
85858452\_Syntrophus\_acidithiophilus\_SB  
148657121\_Roseiflexus\_sp.\_RS-1  
159898907\_Herpetosiphon\_aurantiacus\_DSM\_785  
17227877\_Nostoc\_sp.\_PCC\_7120  
268318378\_Rhodothermus\_marinus\_DSM\_4252  
55978328\_Thermus\_thermophilus\_HB8  
297622675\_Truerpera\_radiovictrix\_DSM\_17093  
328953000\_Desulfobacca\_acetoxidans\_DSM\_11109  
337286709\_Thermodesulfator\_indicus\_DSM\_15286  
328953422\_Desulfobacca\_acetoxidans\_DSM\_11109  
38505684\_Synechocystis\_sp.\_PCC\_6803  
134299482\_Desulfotomaculum\_reducens\_MI-1  
17229060\_Nostoc\_sp.\_PCC\_7120  
302391602\_Acetohalobium\_arabaticum\_DSM\_5501  
159898755\_Herpetosiphon\_aurantiacus\_DSM\_785  
320161859\_Anaerolinea\_thermophila\_UNI-1  
156741961\_Roseiflexus\_castenholzii\_DSM\_13941  
383762167\_Caldilinea\_aerophila\_DSM\_14535\_-NBRC\_104270  
46255267\_Thermus\_thermophilus\_HB27  
134101617\_Saccharopolyspora\_erythroa\_NRRL\_2338  
378719041\_Gordonia\_polysiprenivorans\_VH2  
320102061\_Isosphaera\_pallida\_ATCC\_43644  
268318441\_Rhodothermus\_marinus\_DSM\_4252  
39995168\_Geobacter\_sulfurreducens\_PCA  
83591519\_Rhodospirillum\_rubrum\_ATCC\_11170  
50085564\_Acinetobacter\_sp.\_ADP1  
7716205\_Nitrosococcus\_oceanii\_ATCC\_19707  
15602176\_Pasteurella\_multocida\_subsp\_multocida\_str\_Pm70  
38234755\_Corynebacterium\_diphtheriae\_NCTC\_13129  
21674788\_Chlorobium\_tepidum\_T18  
53804737\_Methylococcus\_capsulatus\_str\_Bath  
209966592\_Rhodospirillum\_centenum\_SW  
89885834\_Rhodofera\_x\_ferri\_reducens\_T118  
16130662\_Escherichia\_coli\_str\_K-12\_substr\_MG1655  
68535718\_Corynebacterium\_jeikeium\_K411  
86738746\_Frankia\_sp.\_Cc13  
51891801\_Symbiobacterium\_thermophilum\_IAM\_14863  
29834079\_Streptomyces\_avermitilis\_MA-4680

-----WR--LER-R--RR--RPP-PDPVNLISVYLS-AVLHRDLAALFVVRHGLHPGFGALH---SARD-GAQAQVSDLIEEFRAPL---VEGLAVLYFN-NR--  
LAKSYFYPALGR-CL--EQ--G-----FH--PNG-R--SR--RTA-EDCFNSALNFGY-SILYSCLMGLIKKNGLSLPGFVHIH---KHQ-HHATLASDIMEEWRPII---VDNTLMELIR-N--  
AAKAYFTALGH-LV-PQ-E-----FA-PQG-R--ST--RPP-LDAPNSVMSVLY-SLLYKNIIGAIERHSINAYIGFLH---QDSR-GHATLASDIMEEWRPII---IDDTVRLRIA-D--  
AAKIYFSAIGK-LV-DP-T-----FA-PEK-R--SK--RPP-LDAPNSVMSVLY-TLIMYELPTAITNEGLHPYVGLFH---TLKE-HHPALASDIMEEWRPII---ADSFVMSLVQ-H--  
ASKHYFKALSL-MV-DR-R-----FA-FSG-R--NR--MPP-LDPPNSLSLSLY-TLLIYETIYAVVNGKGLHPYAGLHM---RDRQ-GHPALASDIMEEWRPII---VDSLVMSIVQ-G--  
AARYYVQGLAE-LV-EP-D-----FA-FSG-R--NR--RPP-RDPPNSLSLSLY-TLLIMYDYTAAVNRGLNYPASFLH---SIRR-GHPALASDIMEEWRPII---ADSLALVYTS-K--  
IASIYFPAALN-LF-IH-K-E-----FK-FPG-R--NR--RPP-LDIPNALMSVLY-VLLQYRVSVLYECSLDPLYGFFH---TTYD-SKPSLALDIMEEWRPII---VDGLVRLRLN-K--  
AARVYFAPGQ-LI-TNAA-----FS--PSL-R--NR--RPP-LDPPNSLSLSLY-TLLFNWVLSLISSEGLSPYGFNFH---YGER-DKPSLALDIMEEWRPII---VDMGRVRLN-N--  
AATLYFQGLGS-LF-TG-A-----FV-FEK-R--TK--RPP-TDPPNSLSLSLY-TLLSQVNSVFSVQVIGLHPHFGALH---VPRD-HPALASDIMEEWRPII---VDSLVLYLN-S--  
GAATYFVGFDP-PF--DT--G-G-----FI-FRE-R--VK--RPP-TDPPNSLSLSLY-SLLFNISFMARLHRLHPVYGLH---ADKP-AHPALASDIMEEWRPII---VDGLVIALLN-K--  
ASALYFPCYGM-LF--SK--N-P-----FH--TRSFRL--VR--RPP-TDPPNSLSLSLY-TMLHTNIFSMVQASGLNYPYIGFLH---AERK-GNPAVNDVLEEFPRFI---ADSLVLYTLN-R--  
AARVYFPCGLQ-LF--PA-E-----LQ--PTL-R--SR--RPP-MDIANSALYLY-TLLTACTVTAALVAGLDPAIGFLH---ADDK-GRPSLALDIMEEWRPII---ADQVITVTAAR-N--  
AAREYFVQGLQ-QF--SA-D-----WG--PNS-R--NR--QPP-KDIPINMSVLY-TLLFHNIRALVEARGLLPHLGYLH---GSQP-QRPSLALDIMEEWRPII---VDLVLVQLAQ-K--  
GSKYFSGFKG-CI--RT--EE-----LT--PNG-R--TA--HPP-KDEINMSVLY-YPLVVELLAINAVGLDPPYGFNH---TIDV-SKQSLDFVLEEFRCVI---IDNFVNLIN-L--  
AANRYFQGLGS-LF--ENSN-----FI-FFG-R--SR--RPP-GNPVNALMSVLY-QVWNLHLLTLELQGLDPAQCLH---QSGE-RHAALASDIMEEWRPII---VDSLVLYMIN-R--  
GAHQYFAGLRT-AF--VG-G-----IP--FLG-R--AQ--RPP-PDPNSLSLSLY-VLLGNRLTGLLEARGVDPCLGFFH---DLRP-GRPSLALDIMEEWRPII---VDRALALRCN-L--  
261415948\_Fibrobacter\_succinigenes\_subsp\_succinigenes\_S85  
76802276\_Natronomonas\_pharaonis\_DSM\_2160  
312114617\_Rhodomicrobium\_vannielii\_ATCC\_17100  
219683006\_Bifidobacterium\_animalis\_subsp\_lactis\_AD011  
116748794\_Syntrophobacter\_fumaroxidans\_MPOB  
317051217\_Desulfuripirillum\_indicum\_S5  
328949009\_Treponema\_succinifaciens\_DSM\_2489  
333996012\_Treponema\_aotonicum\_ZAS-9  
313673559\_Calditerrivibrio\_nitroreducens\_DSM\_19672  
218961167\_Candidatus\_Chloracomonas\_acidaminovorans\_str\_Evry  
29488260\_Lentocoptira\_intervorans\_serovar\_Lai\_str\_56601  
347756303\_Candidatus\_Chloracidobacterium\_thermophilum\_B  
162457462\_Sorangium\_cellulosum\_So\_c656  
86742032\_Frankia\_sp.\_Cc13  
433631663\_Mycobacterium\_canettii\_CIPT\_140070010  
15612904\_Bacillus\_halodurans\_C-125  
108763792\_Mycococcus\_xanthus\_DK\_1622  
344996859\_Caldicellulosiruptor\_lactooacetatus\_6A  
85858452\_Syntrophus\_acidithiophilus\_SB  
148657121\_Roseiflexus\_sp.\_RS-1  
159898907\_Herpetosiphon\_aurantiacus\_DSM\_785  
17227877\_Nostoc\_sp.\_PCC\_7120  
268318378\_Rhodothermus\_marinus\_DSM\_4252  
55978328\_Thermus\_thermophilus\_HB8  
297622675\_Truerpera\_radiovictrix\_DSM\_17093  
328953000\_Desulfobacca\_acetoxidans\_DSM\_11109  
337286709\_Thermodesulfator\_indicus\_DSM\_15286  
328953422\_Desulfobacca\_acetoxidans\_DSM\_11109  
38505684\_Synechocystis\_sp.\_PCC\_6803  
134299482\_Desulfotomaculum\_reducens\_MI-1  
17229060\_Nostoc\_sp.\_PCC\_7120  
302391602\_Acetohalobium\_arabaticum\_DSM\_5501  
159898755\_Herpetosiphon\_aurantiacus\_DSM\_785  
320161859\_Anaerolinea\_thermophila\_UNI-1  
156741961\_Roseiflexus\_castenholzii\_DSM\_13941  
383762167\_Caldilinea\_aerophila\_DSM\_14535\_-NBRC\_104270  
46255267\_Thermus\_thermophilus\_HB27  
134101617\_Saccharopolyspora\_erythroa\_NRRL\_2338  
378719041\_Gordonia\_polysiprenivorans\_VH2  
320102061\_Isosphaera\_pallida\_ATCC\_43644  
268318441\_Rhodothermus\_marinus\_DSM\_4252  
39995168\_Geobacter\_sulfurreducens\_PCA  
83591519\_Rhodospirillum\_rubrum\_ATCC\_11170  
50085564\_Acinetobacter\_sp.\_ADP1  
7716205\_Nitrosococcus\_oceanii\_ATCC\_19707  
15602176\_Pasteurella\_multocida\_subsp\_multocida\_str\_Pm70  
38234755\_Corynebacterium\_diphtheriae\_NCTC\_13129  
21674788\_Chlorobium\_tepidum\_T18  
53804737\_Methylococcus\_capsulatus\_str\_Bath  
209966592\_Rhodospirillum\_centenum\_SW  
89885834\_Rhodofera\_x\_ferri\_reducens\_T118  
16130662\_Escherichia\_coli\_str\_K-12\_substr\_MG1655  
68535718\_Corynebacterium\_jeikeium\_K411  
86738746\_Frankia\_sp.\_Cc13  
51891801\_Symbiobacterium\_thermophilum\_IAM\_14863  
29834079\_Streptomyces\_avermitilis\_MA-4680

## Continued

407462288\_Candidatus\_Nitrosopumilus\_koreensis\_AR1  
21229351\_Methanosarcina\_mazei\_Gol  
147921327\_Methanocella\_avorzyae\_MRE50  
124485266\_Methanocorpusculum\_labreanum\_Z  
307352568\_Methanoplanus\_petrolearius\_DSM\_11571  
154150254\_Methanoregula\_boonei\_6A8  
219852754\_Methanosphaerula\_palustris\_E1-9c  
126178701\_Methanoculleus\_marisnigri\_JR1  
397780289\_Methanoculleus\_bourgensis\_M52  
156937861\_Igmicoccus\_hospitalis\_K1N4-I  
70607609\_Sulfolobus\_acidocaldarius\_DSM\_639  
77163488\_Akermansia\_muciniphila\_ATCC\_BAA-835  
436839745\_Desulfovibrio\_hydrothermalis\_AM13\_-DSM\_14728  
71894593\_Mycoplasma\_synoviae\_53  
193216853\_Mycoplasma\_arthritis\_158L3-1

QR-----IKLKEYSFPTKDG-----T-VVV-----LEVSLIKRFLMLEERQFSQERKYSFRHGKKTGDKLSVQETIVVKKIILIQ---NLVVEYS--TGK---QKSLES  
-G--AMESK-DFIRTE-----NY--N-LR-----LKPTGARKVINEFSNT-LNKKVSYQK-----ESTWSYVIFPKVR---ELAHYLF--TSK-KEKLDFTK  
-K--KLKGN-DFIVTE-----NY--H-LR-----LKEATAKKLIIEIRKLN-FNLKAPYKNG---NYTYENILIDQVQ---QFANI-FQK-NKTVEFTT  
-E-----RLDG-AYEVTT-----R-CL-----LSNELKEEFMKRHLGHS-IN-----ITLIEENVM---RYAESV-KDG-RDIVPH-  
-G--YLITDDMYEINTNK-R-CH-----LDQGTLRLLSNALKSS-ID-----QRKIEENVM---SYRDSL-INR  
-S-----LNVG-DPEITS-----N-R-CI-----LSDNLIQNLMSFPRKS-ID-----NQKLDCCVH---NFLQAL-SNK-EDTLTF-  
-G--ITAS-DYEIGE-----S-R-CT-----LDNLRIRMLLHLQTS-IE-----VTAIGRQVE---MLADL-TRN-REFQILDP  
-E--ISSG-DYECSE-----K-R-CY-----LGDLSRSLAALALRDS-ID-----QARIDAQVR---IVRDAL-LAN  
-E--EISED-DYECSE-----K-R-CY-----LDANLSTRVLQVEFRDS-ID-----QSRVDTQVQ---ILRDAL-LTN  
-Y--KIELEGDF-----L-----LNKESLQKVTQLFYSI-FESK-----KYSVRKVVYAKAM---QLRDAI-ESGK  
-L--KLDSN-----G-Y-----LSKESLGHILTKHLYET-LHKG-----KRSVRGQIYSQGM---KTKNI-I-ABG  
-G--KTEER-----A-G-E-----ITREFRQHTITLQAS-VMYRDK---QLPLKAAVEAVCR---SFRKAV-LDG-QSE  
-N--ITAK-DFEPTV-----AK-K-FK-----LNGRSMGKILSFEKE-MCIRIATE---AGTFQAQLDAQVQ---NLRNMV-MGR---DELKFPF  
-----IEKNYDF-----IFKFKVFLIFEEK-ILLNKS-----PISVNEY---CK---LIENTI-NK  
-----ISRGEPNF-----QFKBELFTTIFYKH-FNQCQE-----NMLMIDCIKDLVV---LIVSDH-DIKV

187250661 Elusimicrobium minutum Peil91  
325972002 Sphaerochaeta globus\_str\_Buddy  
47458867 Mycoplasma mobile\_163K  
269123825 Streptobacillus moniliformis\_DSM\_12112  
57865886 Staphylococcus epidermidis\_RP62A  
319957207 Nitratifactor salsuginis\_DSM\_16511  
310286727 Bifidobacterium bifidum\_S17  
90961086 Lactobacillus salivarius\_UC118  
406600270 Leuconostoc gelidum\_AB7  
386318631 Staphylococcus pseudintermedius\_ED99  
302336019 Olsenella ulii\_DSM\_7084  
15675042 Streptococcus pyogenes\_M1\_GAS  
352684362 Acidaminococcus intestini\_RyC-MR95  
42525844 Treponema denticola\_ATCC\_35405  
169823756 Finegoldia magna\_ATCC\_29328  
117929157 Acidothermus cellulolyticus\_11B  
283456134 Bifidobacterium dentium\_Bd1  
38232679 Corynebacterium diphtheriae\_NCTC\_13129  
238924076 Eubacterium rectale\_ATCC\_33656  
116627543 Streptococcus thermophilus\_LMD-9  
57238545 Campylobacter jejuni\_RM1221  
291276264 Helicobacter mustelae\_12198  
294086112 Candidatus Puniceispirillum marinum\_IMCC1322  
189485226 uncultured\_Termite\_group\_1\_bacterium\_phylogroup\_Rs-D17  
222109284 Acidovorax ebureus\_TPN5Y  
15602991 Pasteurella multocida\_subsp\_multocida\_str\_Pm70  
55376278 Halorarcula marismortui\_ATCC\_43049  
220930481 Clostridium cellulosum\_H10  
34557789 Wolinella succinogenes\_DSM\_1740  
90425960 Rhodospirillum rubrum\_BisB18  
209542526 Gluconacetobacter diazotrophicus\_Pal\_5  
121608212 Verminephrobacter eiseniae\_EF01-2  
60683388 Bacteroides fragilis\_NCTC\_9343  
154250554 Parvibaculum lavamentivorans\_DS-1  
283778924 Pirellula staleyi\_DSM\_6068  
154174048 Campylobacter curvus\_525-92  
292492938 Nitrosococcus halophilus\_Nc4  
111224947 Frankia alni\_ACN14a  
385809790 Igmavibacterium album\_JCM\_16511  
150021526 Thermosiphon melanesiensis\_BI429  
28211139 Clostridium tetani\_E88  
48477075 Picrophilus torridus\_DSM\_9790  
41614813 Nanoarchaeum equitans\_Kin4-M  
55376278 Haloarcula marismortui\_ATCC\_43049  
389844445 Mesocosa prima\_MesG1-Ag-4-2  
390962116 Thermococcus\_sp\_C11  
13540937 Thermoplasma volcanium\_GSS1  
289596694 Aciduliprofundum boonei\_T469  
14590110 Pyrococcus horikoshii\_OT3  
84489236 Methanosphaera stadtmanae\_DSM\_3091  
268317185 Rhodothermus marinus\_DSM\_4252  
18977490 Pyrococcus furiosus\_DSM\_3638  
427708213 Nostoc\_sp\_PCC\_7107  
119720226 Thermofilum pendens\_Hrk\_5  
118497969 Francisella novicida\_U112  
32661941 Haliscomenobacter hydrossis\_DSM\_1100  
326793969 Marinomonas mediterranea\_MMB-1  
220934970 Thioalkalivibrio sulfidophilus\_HL-EbGr7  
288947693 Allochromatium vinosum\_DSM\_180  
431929780 Thiohalococcus mobilis\_8321  
206890539 Thermodesulfobaculum yellowstonii\_DSM\_11347  
524295690 Mannheimia succiniciproducens\_MBB1555  
30248142 Nitrosomonas europaea\_ATCC\_19718  
121997419 Halorhodospira halophila\_S11  
430760780 Thioalkalivibrio nitratireducens\_DSM\_14787  
292492856 Thioaradiferous halophilus\_Nc4  
34541577 Porphyromonas gingivalis\_W83  
88602029 Methanospirillum hungatei\_JF-1  
325980970 Nitrosomonas\_sp\_AB212  
269798874 Veillonella parvula\_DSM\_2008  
32668016 Haliscomenobacter hydrossis\_DSM\_1100  
379728404 Saprospira grandis\_str\_Lewin  
327314603 Prevotella denticola\_F0289  
392395717 Flexibacter litoralis\_DSM\_6794  
150398872 Methanococcus vannielii\_SB  
150401497 Methanococcus aelicus\_Nankai-3  
284040851 Spirosoma linguale\_DSM\_74  
257125862 Leptotrichia buccalis\_C-1013-b  
21226661 Methanosarcina mazei\_G01  
218961577 Candidatus Cloacamonas acidaminovorans\_str\_Evry  
319790504 Thermovibrio ammonificans\_HB-1  
337288662 Thermodesulfobacterium geofontis\_OPF15  
20094748 Methanopyrus kandleri\_AV19  
386750121 Helicobacter ceterum\_MIT\_00-7128  
126465226 Staphylothermus marinus\_F1  
170290046 Candidatus Korarchaeum cryptofilum\_OPF8  
385805115 Pervidiococcus fontis\_Kam940  
15898245 Sulfolobus solfataricus\_P2  
156937921 Igmicoccus hospitalis\_KIN4-I  
124027534 Hyperthermus butylicus\_DSM\_5456  
118431380 Aeropyrum pernix\_K1  
307595807 Vulcanisaeta distributa\_DSM\_14429  
305663330 Igmisphaera aggregans\_DSM\_17230  
347523053 Pyrolobus fumarii\_1A  
302347808 Acidilobus saccharovorans\_345-15



218884093\_Desulfurococcus\_kamchatkensis\_1221n
389861365\_Thermogladius\_cellulolyticus\_1633
15898286\_Sulfolobus\_solfataricus\_P2
15922975\_Sulfolobus\_tokodaii\_str\_7
18311772\_Pyrobaculum\_aerophilum\_str\_IM2
18311699\_Pyrobaculum\_aerophilum\_str\_IM1
54296139\_Legionella\_pneumophila\_str\_Paris
34557933\_Wolfinella\_succinogenes\_DSM\_1740
118497953\_Francisella novicida\_I112
328954440\_Desulfobacca\_acetoxidans\_DSM\_11109
408403000\_Candidatus\_Nitrososphaera\_gargensis\_Ga9-2
330509017\_Methanosaeta\_concillii\_GP6
148656004\_Roseiflexus\_sp\_RS-1
386854797\_Deinococcus\_gobiensis\_I-0
167628642\_Heliobacterium\_modericalcium\_Icel
148642083\_Methanobrevibacter\_smithii\_ATCC\_35061
288560430\_Methanodesulfovibacter\_ruminantium\_M1
11499462\_Archaeoglobus\_fulgidus\_DSM\_4304
383319612\_Methanocella\_conradii\_HZ254
294676823\_Rhodobacterium\_capsulatus\_SB\_1003
302343124\_Desulfurcalus\_baarsii\_DSM\_2075
389875622\_Tistrella\_mobilis\_KA081020-065
374998939\_Azospirillum\_lipoferum\_4B
288957883\_Azospirillum\_sp\_B510
11662764\_Streptococcus\_thermophilus\_LMD-9
15069954\_Mycobacterium\_tuberculosis\_H37Rv
148426605\_Mesaphaera\_eichsenii\_DSM\_20460
296133514\_Thermicola\_potens\_JR
114567264\_Syntrophomonas\_wolfiei\_subsp\_wolfiei\_str\_Goettingen
332296542\_Thermodesulfobium\_narugense\_DSM\_14796
218442809\_Cyanothece\_sp\_PCC\_7424
17228961\_Nostoc\_sp\_PCC\_7120
119357853\_Chlorobium\_phaeobacteroides\_DSM\_266
119357846\_Chlorobium\_phaeobacteroides\_DSM\_266
336116789\_Microclunatus\_phosphovorus\_NM-1
37677204\_Vibrio\_vulnificus\_YJ016
154250301\_Feravidobacterium\_nodosum\_Rt17-B1
38505760\_Synechocystis\_sp\_PCC\_6803
83592490\_Rhodospirillum\_rubrum\_ATCC\_11170
261415948\_Fibrobacter\_succinigenes\_subsp\_succinigenes\_S85
76802276\_Natronomonas\_phaeococcus\_DSM\_2160
312114617\_Rhodomicrobium\_vannielii\_ATCC\_17100
219683006\_Bifidobacterium\_animalis\_subsp\_lactis\_AD011
116748794\_Syntrophobacter\_fumaroxidans\_MPOB
317051217\_Desulfurispirillum\_indicum\_S5
328949009\_Treponema\_succinifaciens\_DSM\_2489
333996012\_Treponema\_azotonutricium\_ZAS-9
313673559\_Calditerrivibrio\_nitroreducens\_DSM\_19672
218961167\_Candidatus\_Cloacomonas\_acidaminovorans\_str\_Evry
294828260\_Leptospira\_interrogans\_serovar\_Lai\_str\_56601
347756301\_Candidatus\_Chloracidobacterium\_thermophilum\_B
162457462\_Sorangium\_cellulosum\_So\_ce56
86742032\_Frankia\_sp\_CcI3
433631663\_Mycobacterium\_canettii\_CIPT\_14007010
15612904\_Bacillus\_halodurans\_C-125
108763792\_Myxoococcus\_xanthus\_DK\_1622
344996859\_Caldicellulosiruptor\_lacteoaceticus\_6A2
85858452\_Syntrophus\_acidithiophicus\_SB
148657121\_Roseiflexus\_sp\_RS-1
15989807\_Herpetosiphon\_aurantiacus\_DSM\_785
17228787\_Nostoc\_sp\_PCC\_7120
36871837\_Rhodothermus\_marinus\_DSM\_4252
55978328\_Thermus\_thermophilus\_HB8
297622675\_Trupera\_radiovictrix\_DSM\_17093
328953000\_Desulfobacca\_acetoxidans\_DSM\_11109
337286709\_Thermodesulfator\_indicus\_DSM\_15286
328953422\_Desulfobacca\_acetoxidans\_DSM\_11109
38505684\_Synechocystis\_sp\_PCC\_6803
134299482\_Desulfotomaculum\_reducens\_MI-1
17229060\_Nostoc\_sp\_PCC\_7120
302391602\_Acetohalobium\_arabaticum\_DSM\_5501
159898755\_Herpetosiphon\_aurantiacus\_DSM\_785
320161859\_Anaerolinea\_thermophila\_UNI-1
156741961\_Roseiflexus\_castenholzii\_DSM\_13941
383762167\_Caldilinea\_aerophila\_DSM\_14535\_-NBRC\_104270
46255267\_Thermus\_thermophilus\_HB27
134101617\_Saccharopolyspora\_erythraea\_NRR1\_2338
378719041\_Gordonia\_polyisoprenivorans\_VH2
320102061\_Isosphaera\_pallida\_ATCC\_43644
268318441\_Rhodothermus\_marinus\_DSM\_4252
39995168\_Geo bacter\_sulfurreducens\_PCA
83591519\_Rhodospirillum\_rubrum\_ATCC\_11170
50085564\_Acinetobacter\_sp\_ADP1
77166205\_Nitrosococcus\_oceani\_ATCC\_19707
15602176\_Pasteurella\_multocida\_subsp\_multocida\_str\_Pm70
38234755\_Corynebacterium\_diphtheriae\_NCTC\_13129
21674788\_Chlorobium\_tepidum\_T1S
53804737\_Methylococcus\_capsulatus\_str\_Bath
209966592\_Rhodospirillum\_centenum\_SW
89885834\_Rhodoferrax\_ferrireducens\_T118
16130662\_Escherichia\_coli\_str\_K-12\_substr\_MG1655
68535718\_Corynebacterium\_jeikeium\_K411
86738746\_Frankia\_sp\_CcI3
51891801\_Symbiodinium\_thermophilum\_IAM\_14863
29834079\_Streptomyces\_avermitilis\_MA\_4680

# Continued

```
407462288_Candidatus_Nitrosopumilus_koreensis_AR1
21229351_Methanosarcina_mazei_Gol
147921327_Methanocella_arvorizae_MRE50
124485266_Methanocorpusculum_labreanum_Z
307352568_Methanoplanus_petrolearius_DSM_11571
154150254_Methanoregula_boonei_6A8
219852754_Methanosphaerula_palustris_E1-9c
126178701_Methanoculleus_marisnigri_JR1
397780289_Methanoculleus_bourgensis_MS2
156937861_Ignicoccus_hospitalis_KIN4-I
70607609_Sulfolobus_acidocaldarius_DSM_639
187736488_Akkermansia_muciniphila_ATCC_BAA-835
436839745_Desulfovibrio_hydrothermalis_AM13_-_DSM_14728
71894593_Mycoplasma_synoviae_53
193216853_Mycoplasma_arthritis_158L3-1
187250661_Elusimicrobium_minutum_Pei191
325972002_Sphaerochaeta_globus_str_-Buddy
47458867_Mycoplasma_mobile_163K
269123825_Streptobacillus_moniliformis_DSM_12112
57865886_Staphylococcus_epidermidis_RP62A
319957207_Nitratifractor_salsuginis_DSM_16511
310286727_Bifidobacterium_bifidum_S17
90961086_Lactobacillus_salivarius_UCC118
406600270_Leuconostoc_gelidum_JB7
386318631_Staphylococcus_pseudintermedius_ED99
302336019_Olsenella_uli_DSM_7084
15675042_Streptococcus_pyogenes_M1_GAS
352684362_Acidaminococcus_intestini_RyC-MR95
42525844_Treponema_denticola_ATCC_35405
169823756_Pinegolia_magna_ATCC_29328
117929157_Acidotherrmus_cellulolyticus_11B
283456134_Bifidobacterium_dentium_Bd1
38232679_Corynebacterium_diphtheriae_NCTC_13129
238924076_Eubacterium_rectale_ATCC_33565
116627543_Streptococcus_thermophilus_LMD-9
57238545_Campylobacter_jejuni_RMI221
291276264_Helicobacter_mustelae_12198
294086112_Candidatus_Punicicepsirillum_marinum_IMCC1322
189485226_uncultured_Termite_group_1_bacterium_phylotype_Rs-D17
222109284_Acidovorax_ebreus_TPSY
15602991_Pasteurella_multocida_subsp_-multocida_str_-Pm70
310780383_Ilyobacter_polytropus_DSM_2926
220930481_Clostridium_cellulolyticum_H10
34557789_Molinitella_succinogenes_DSM_1740
90425960_Rhodospseudomonas_palustris_BisB18
209542526_Gluconacetobacter_diazotrophicus_PAL_5
121608212_Verminephrobacter_eiseniae_EF01-2
60683388_Bacteroides_fragilis_NCTC_9343
154250554_Parvibaculum_lavamentivorans_DS-1
283778924_Pirellula_staley_i_DSM_6068
154174048_Campylobacter_curvus_525-92
292492938_Nitrosococcus_halophilus_Nc4
111224947_Frankia_alni_ACN14a
385809790_Ignavibacterium_album_JCM_16511
150021526_Thermosiphon_melanesiensis_BI429
28211139_Clostridium_tetani_E88
48477075_Picrophilus_torridus_DSM_9790
41614813_Nanoarchaeum_equitans_Kin4-M
55376278_Haloarcula_marismortui_ATCC_43049
389844445_Mesotoga_prima_MesG1-Ag-4-2
390962116_Thermococcus_sp_-CL1
13540937_Thermoplasma_volcanium_GSS1
289596694_Aciduliprofundum_boonei_T469
14590110_Pyrococcus_horikoshii_OT3
84489236_Methanosphaera_stadtmanae_DSM_3091
268317185_Rhodothermus_marinus_DSM_4252
18977490_Pyrococcus_furiosus_DSM_3638
427708213_Nostoc_sp_-PCC_7107
119720226_Thermofilum_pendens_Hrk_5
118497969_Franciella_noviciida_U112
332661941_Haliscobenobacter_hydrossis_DSM_1100
326793969_Marionomonas_mediterranea_MMB-1
220934970_Thioalkalivibrio_sulfidophilus_HI_-EBGr7
288947693_Allochromatium_vinosum_DSM_180
431929780_Thioflavococcus_mobilis_8321
206890539_Thermodesulfovibrio_yellowstonii_DSM_11347
52425690_Mannheimia_succiniciproducens_MBEL55E
30248142_Nitrosomonas_europaea_ATCC_19718
121997419_Halorhodospira_halophila_SL1
430760780_Thioalkalivibrio_nitratireducens_DSM_14787
292492856_Nitrosococcus_halophilus_Nc4
34541577_Porphyrromonas_gingivalis_W83
88602029_Methanospirillum_hungatei_JF-1
325980970_Nitrosomonas_sp_-AL212
269798874_Veillonella_parvula_DSM_2008
332668016_Haliscobenobacter_hydrossis_DSM_1100
379728404_Saprosira_grandis_str_-Lewin
327314603_Prevotella_denticola_F0289
NNF----AFPDF-----
PEVEIERIDSYDTRQKLLSISYVDWKKLGFSGKGLHYMKQNAKSDKPFLLNAHVLERVNWKEALVSQR-----
PDMVNRDDPSDVRDALLKMTPAERKKLGLSKTTLWYMQKNLREGKRKIKIYEKSKGKLN-----STKT-----
-----RPLRFSY-----
--Y-----
AEP----LPR1PLKNH-----
-----AEPHVLWY-----
-----AEPHVLWY-----
-EP----KAPVFRP-----
IDF----EPPVYKPKQ-----
-PY----EPWLMTTIKWAG-----
SGE----RNLSLGEVEIT-----
FNP----ESLEIDWNKK-----
IIF----PALIK-----
IQF----PKRYAMAV-----
-SW----EWVELWD-----
PEI----IKIDPYDLPKEL-----
PTYLL---LPKMLEVGN-----
IDF----GALRECF-----
PELGFVRCGTELCE-----
NEV----PNNAINDNI-----
LKL----PEWRFEI-----
IKI----PTWTY-----
GEI----EPPDIV-----
KGV----PEPRI-----
-----SKTKYIEI-----
SQI----NPFYRNEL-----
IKF----IDYEL-----
RSL----RPPAMELSHA-----
PEYR----GPYEGK-----
P1WE----GPFDAER-----
YNI----IGREY-----
SKFHCPPVSSLEWRK-----
-EL----KIVKFPD-----
ESNGREYVESFSDV-----
MPM----PQLIPELETEAMVSEC-----
LLL----PEFKTA-----
PRLIQLRQHVFEI-----
LPL----KEHOYE-----
IPI----QEHRYV-----
PEI----IPLVHANE-----
VQG----EVVEADGDV-----
-----KPALLELPELERIS-----
LST----PTLKARD-----
PGLPLALAGSFPD-----
ISY----PER-----
PEG----MPLAPDLLDNDGEG-----
-RP----EPFRHP-----
MPY----VGFVWQ-----
AEY----ESFKRV-----
TPY----TPFRPWV-----
KSY----DPYRAN-----
EY----KGFVLKE-----
-EF----KFPFLKERM-----
KRY----KPYISKR-----
-KF----KAFRLY-----
-EY----VPPFRWV-----
EDY----KALHMWV-----
ETV----GPPFRWV-----
EDY----KSPFRSRS-----
KRY----RAPFRWV-----
KEY----KSLRAWV-----
KTY----ESPKTWV-----
EPY----RGLHMWV-----
EY----SPLVAVF-----
EPY----RPLALKPHPANSDFNTNTIKPQTVP1KLVKR-----
LAF----TWKKRYLIHE-----
AEY----PIFYETRRVYVDSQL-----
--HH----LPLD-----
--F----LWSPKR-----
PAF----EPPFTR-----
-----DEFGLEF-----
-----TPEAPS-----
-----KDILSG-----
DQF----DDYTNMAHILGNEKCDI-----
PDH----DSGDWE-----
EA-----
PDG----DDEAGET-----
PRS-----
KPY----TPKW-----
-EY----VPYRYRT-----
-GS----ELKVLR-----
EKS----ENIS-----
--DF-----
-----TKTVKR-----
```

|                                                               |                                                                                                     |
|---------------------------------------------------------------|-----------------------------------------------------------------------------------------------------|
| 392395717_Flexibacter_litoralis_DSM_6794                      | -----SE                                                                                             |
| 150398872_Methanococcus_vannielii_SB                          | -----                                                                                               |
| 150401497_Methanococcus_aelicus_Nankai-3                      | -----                                                                                               |
| 284040851_Spirosoma_linguale_DSM_74                           | VKL-----                                                                                            |
| 257125862_Leptotrichia_buccalis_C-1013-b                      | -----                                                                                               |
| 21226661_Methanosarcina_mazei_Go1                             | -----                                                                                               |
| 218961577_Candidatus_Cloacamonas_acidaminovorans_str_-Evry    | RKL----QNFLNSNFPADNGEEEC                                                                            |
| 319790504_Thermovibrio_ammonificans_HB-1                      | -LV-----                                                                                            |
| 337288662_Thermodesulfobacterium_geofontis_OPF15              | -DF-----                                                                                            |
| 20094748_Methanopyrus_kandleri_AV19                           | LEF----DPEDVGVVMDALEV                                                                               |
| 386750121_Helicobacter_cetorum_MIT_00-7128                    | -SY----KPF1GKY                                                                                      |
| 126465226_Staphylothermus_marinus_F1                          | -----PPYMPW                                                                                         |
| 170290046_Candidatus_Korarchaeum_cryptofilum_OPF8             | EPT----MPY1PW                                                                                       |
| 385805115_Pervidicoccus_fontis_Kam940                         | EAR----MDMSMKW                                                                                      |
| 15898245_Sulfolobus_solfataricus_P2                           | EEY----RPYLAK                                                                                       |
| 156937921_Ignicoccus_hospitalis_KIN4-I                        | ----REYLPGWKGCT                                                                                     |
| 124027534_Hyperthermus_butylicus_DSM_5456                     | KPY----KPF1VGR1                                                                                     |
| 118431380_Aeropyrum_pernix_K1                                 | GGF----SAVRLGL                                                                                      |
| 307595807_Vulcanisaeta_distributa_DSM_14429                   | NEY----KCPFWVY                                                                                      |
| 305663330_Ignisphaera_aggregans_DSM_17230                     | SVY----KGFVYVL                                                                                      |
| 347523053_Pyrolobus_fumarii_1A                                | -MY----APPREAVR                                                                                     |
| 302347808_Acidilobus_saccharovorans_345-15                    | -AY----SCYAGPEPL                                                                                    |
| 218884093_Desulfurococcus_kamchatkensis_1221n                 | SGF----EGFVHGW                                                                                      |
| 389861365_Thermogladius_cellulolyticus_1633                   | SHD----SPGRVHRGRRDQGEAQR1PEVQGADEPEERLRWEAAAHVHGEGRGEGATQVREGGEGRDL1HPAPRVQVQVQVLRPPPRGPRVGGQAPGGVI |
| 15898286_Sulfolobus_solfataricus_P2                           | -EY----RGFKLVM                                                                                      |
| 15922975_Sulfolobus_tokodaii_str_-7                           | -KF----KGFVKVW                                                                                      |
| 18311772_Pyrobaculum_aerophilum_str_-IM2                      | -----                                                                                               |
| 18311699_Pyrobaculum_aerophilum_str_-IM2                      | ----AY--TPHQL                                                                                       |
| 54296139_Legionella_pneumophila_str_-Paris                    | GKY----KGYLPKW                                                                                      |
| 34557933_Wolinella_succinogenes_DSM_1740                      | -RV----KSY1PKW                                                                                      |
| 118497353_Francisella_novicida_U112                           | HNV----KPY1PKW                                                                                      |
| 328954440_Desulfobacca_acetoxidans_DSM_11109                  | KRY----RSPFRGY                                                                                      |
| 408403000_Candidatus_Nitrososphaera_gargensis_Ga9-2           | -EY----DPFELAW                                                                                      |
| 330509017_Methanoseta_concillii_GP6                           | PCY----EPFTRPW                                                                                      |
| 148656004_Roseiflexus_sp_-RS-1                                | PTY----EPFVMGW                                                                                      |
| 386854797_Deinococcus_gobiensis_I-0                           | GDY----PVYIASW                                                                                      |
| 167628642_Heliobacterium_modesticaldum_Icel                   | -KY----KPFVCSW                                                                                      |
| 148642083_Methanobrevibacter_smithii_ATCC_35061               | TEY----NGPYLNV                                                                                      |
| 288560430_Methanobrevibacter_ruminantium_M1                   | -PY----EGFSLRW                                                                                      |
| 11499462_Archaeoglobus_fulgidus_DSM_4304                      | RRY----EGFVQKW                                                                                      |
| 383319612_Methanocella_conradii_HZ254                         | KSY----TGFWLRW                                                                                      |
| 294676823_Rhodobacter_capsulatus_SB_1003                      | VPY----LPQLQDY                                                                                      |
| 302343124_Desulfurarculus_baarsii_DSM_2075                    | -VY----APYDMKY                                                                                      |
| 389875622_Tistrella_mobilis_KA081020-065                      | APF----VPYDLY                                                                                       |
| 374998939_Azospirillum_lipoferum_4B                           | -PY----RAYYMDY                                                                                      |
| 288957883_Azospirillum_sp_-B510                               | -PY----RPPILDY                                                                                      |
| 116627764_Streptococcus_thermophilus_LMD-9                    | -LV----ETSYTGGH                                                                                     |
| 15609954_Mycobacterium_tuberculosis_H37Rv                     | -RL----VDIDITSEPSGA                                                                                 |
| 348026605_Megasphaera_elsdenii_DSM_20460                      | KL1Y---EP1W1R                                                                                       |
| 296133514_Thermincola_potens_JR                               | -IY----RPVRLR                                                                                       |
| 114567264_Syntrophomonas_wolfei_subsp_-wolfei_str_-Goettingen | -IY----QPVV1R                                                                                       |
| 332296542_Thermodesulfobium_narugense_DSM_14796               | -TY----KPF1QKQ                                                                                      |
| 218442809_Cyanothece_sp_-PCC_7424                             | -SY----QSFVRDI                                                                                      |
| 17228961_Nostoc_sp_-PCC_7120                                  | -LV----RPM1WKL                                                                                      |
| 119357853_Chlorobiumphaeobacteroides_DSM_266                  | KPY----TPYLRR                                                                                       |
| 119357846_Chlorobiumphaeobacteroides_DSM_266                  | -QY----DPYKLPV                                                                                      |
| 336116789_Microlunatus_phosphovorans_NM-1                     | -PW----TGLSWR                                                                                       |
| 37677204_Vibrio_vulnificus_YJ016                              | -SL----TQQ1R1                                                                                       |
| 154250301_Pervidobacterium_nodosum_Rt17-B1                    | -KY----QPY1LEK1                                                                                     |
| 38505760_Synechocystis_sp_-PCC_6803                           | -SY----SPPLLR                                                                                       |
| 83592490_Rhodospirillum_rubrum_ATCC_11170                     | -PY----RFRFRTSRPG                                                                                   |
| 261415948_Fibrobacter_succinogenes_subsp_-succinogenes_S85    | -BM----ADLQNMPEYSESA                                                                                |
| 76802276_Natronomonas_pharaonis_DSM_2160                      | DQY----HDL1TOR                                                                                      |
| 312114617_Rhodomicrobium_vannielii_ATCC_17100                 | -GP----EALERP                                                                                       |
| 219683006_Bifidobacterium_animalis_subsp_-lactis_AD011        | -RY----RGR1VR                                                                                       |
| 116748794_Syntrophobacter_fumaroxidans_MPOB                   | -SV----EPP1WSEVS                                                                                    |
| 317051217_Desulfurispirillum_indicum_S5                       | -SY----QPFVRPQN                                                                                     |
| 328949009_Treponema_succinificans_DSM_2489                    | TEY----KAYYFK                                                                                       |
| 333996012_Treponema_azotonutricium_ZAS-9                      | SEY----RGYLYK                                                                                       |
| 313673559_Calditerrivibrio_nitroreducens_DSM_19672            | -IY----QPF1LI                                                                                       |
| 218961167_Candidatus_Cloacamonas_acidaminovorans_str_-Evry    | -EY----SPPLWL                                                                                       |
| 294828260_Leptospira_interrogans_serovar_Lai_str_-56601       | -IF----AQARLR                                                                                       |
| 347756303_Candidatus_Chloracidobacterium_thermophilum_B       | -LF----ARMRLR                                                                                       |
| 162457462_Sorangium_cellulosum_So_ce56                        | -LF----ARFR1R                                                                                       |
| 86742032_Frankia_sp_-CcI3                                     | -RY----1PWSPT                                                                                       |
| 433631663_Mycobacterium_canettii_C1PT_140070010               | -HY----PPYRT1GR                                                                                     |
| 15612904_Bacillus_halodurans_C-125                            | -EY----PPPLWK                                                                                       |
| 108763792_Myxococcus_xanthus_DK_1622                          | -GY----PPFAMR                                                                                       |
| 344996859_Caldicellulosiruptor_lactoaceticus_6A               | -RY----1PL1YK                                                                                       |
| 85858452_Syntrophus_acidithiophilus_SB                        | -VY----QPVLK                                                                                        |
| 148657121_Roseiflexus_sp_-RS-1                                | BQY----TGFSLRN                                                                                      |
| 159898907_Herpetosiphon_aurantiacus_DSM_785                   | PRY----QPYWRD                                                                                       |
| 17227877_Nostoc_sp_-PCC_7120                                  | -DY----EAPV1K                                                                                       |
| 268318378_Rhodothermus_marinus_DSM_4252                       | -AV----TPPVA                                                                                        |
| 55978328_Thermus_thermophilus_HB8                             | -RY----TPFYLR                                                                                       |
| 297622675_Truepera_radiovictrix_DSM_17093                     | -PY----SPFYLSARPT                                                                                   |
| 328953000_Desulfobacca_acetoxidans_DSM_11109                  | -TY----QPYTFFW                                                                                      |
| 337286709_Thermodesulfatator_indicus_DSM_15286                | EKY----QAFSLE                                                                                       |
| 328953422_Desulfobacca_acetoxidans_DSM_11109                  | -AY----LPFSYR                                                                                       |
| 38505684_Synechocystis_sp_-PCC_6803                           | VVY----EPLV1R                                                                                       |
| 134299482_Desulfotomaculum_reducens_MI-1                      | -GY----KPLV1R                                                                                       |
| 17229060_Nostoc_sp_-PCC_7120                                  | -KY----PPLVMR                                                                                       |
| 302391602_Acetohalobium_arabaticum_DSM_5501                   | EEY----PPLV1K                                                                                       |
| 159898755_Herpetosiphon_aurantiacus_DSM_785                   | -HY----1PFLVR                                                                                       |
| 320161859_Anaerolinea_thermophila_UNI-1                       | PGY----DDMGFR                                                                                       |



332668018 Haliscomenobacter hydrossis\_DSM\_1100
336854796 Deinococcus gobiensis\_I-0
288560432 Methanobrevibacter\_ruminantium\_M1
330509016 Methanosarcina\_coccilli\_GP6
20094746 Methanopyrus\_kandleri\_AV19
114994601 Archaeoglobus\_fulgidus\_DSM\_4304
383319614 Methanocella\_conradii\_HZ254
148650005 Roseiflexus\_sp\_RS-1
408403001 Candidatus Nitrososphaera\_gargensis\_Ga9-2
167528643 Helicobacterium\_modesticaldum\_Icel
170290048 Candidatus\_Korarchaeum\_cryptofilum\_OPF8
126465228 Staphylothermus\_marinus\_P1
327314605 Prevotella\_denticola\_F0289
392395715 Flexibacter\_litoralis\_DSM\_6794
34541576 Porphyromonas\_gingivalis\_W83
288947692 Allochromatium\_vinosum\_DSM\_180
379728402 Saprospira\_grandis\_str\_Lewin
431929778 Thioflavococcus\_mobilis\_8321
288947691 Allochromatium\_vinosum\_DSM\_180
269798875 Veillonella\_parvula\_DSM\_2008
30248143 Nitrosomonas\_europaea\_ATCC\_19718
206889468 Thermodesulfobacterium\_yellowstonii\_DSM\_11347
121997422 Halorhodospira\_halophila\_SL1
292492855 Nitrosococcus\_halophilus\_Nc\_4
430760779 Thioalkalivibrio\_nitratireducens\_DSM\_14787
317051220 Desulfurispirillum\_indicum\_DSM
118497968 Francisella\_tularensis\_112
76802277 Nitratimonas\_pharaonis\_DSM\_2160
162457463 Sorangium\_cellulosum\_So\_c656
347756304 Candidatus\_Chloracidobacterium\_thermophilum\_B
24215881 Leptospira\_interrogans\_serovar\_Lai\_str\_56601
312114616 Rhodomicrombium\_vamiei\_ATCC\_17100
218884092 Desulfurococcus\_kamchatkensis\_L221n
431929779 Thioflavococcus\_mobilis\_8321
39951619 Geobacter\_sulfurreducens\_PCA
83591518 Rhodospirillum\_rubrum\_ATCC\_11170
332661940 Haliscomenobacter\_hydrossis\_DSM\_1100
261415949 Fibrobacter\_succinigenes\_subsp\_succinigenes\_S85
121997420 Halorhodospira\_halophila\_SL1
302343125 Desulfarculus\_barsis\_DSM\_2075
389875623 Tistrella\_mobilis\_KA081020-065
374998938 Azospirillum\_lipoferum\_4B
34676822 Rhodobacter\_capsulatus\_SB\_1003
288957882 Azospirillum\_sp\_B510
319790503 Thermovibrio\_ammonificans\_HB-1
108759816 Myxococcus\_xanthus\_DK\_1622
15612905 Bacillus\_halodurans\_C-125
189485224 uncultured\_Termite\_group\_1\_bacterium\_phylotype\_Rs-D17
86742033 Frankia\_sp\_Co13
433631662 Mycobacterium\_canettii\_C1PT\_140070010
333996013 Treponema\_azotonutricium\_ZAS-9
328949008 Treponema\_succinificans\_DSM\_2489
337288661 Thermodesulfobacterium\_geofontis\_OPF15
319790501 Thermovibrio\_ammonificans\_HB-1
283778925 Pirellula\_staleyii\_DSM\_6068
386750120 Helicobacter\_cetorum\_MIT\_00-7128
220934971 Thioalkalivibrio\_sulfidophilus\_HL-EbGr7
15609953 Mycobacterium\_tuberculosis\_H37Rv
85858453 Syntrophus\_aciditrophicus\_SB
260318404 Rhodothermus\_marinus\_DSM\_4252
323102062 Sphaera\_pallida\_ATCC\_43644
37819040 Gordonia\_polyisoprenivorans\_VH2
134101618 Saccharopolyspora\_erythroa\_NRRL\_2338
336116790 Microlunatus\_phosphovirus\_NM-1
268318377 Rhodothermus\_marinus\_DSM\_4252
83592489 Rhodospirillum\_rubrum\_ATCC\_11170
206890293 Thermodesulfobacterium\_yellowstonii\_DSM\_11347
52425689 Mannheimia\_succiniciproducens\_MBEL55E
30248141 Nitrosomonas\_europaea\_ATCC\_19718
292492858 Nitrosococcus\_halophilus\_Nc\_4
430760782 Thioalkalivibrio\_nitratireducens\_DSM\_14787
348626606 Megaspheera\_elsdenii\_DSM\_20460
317051218 Desulfurispirillum\_indicum\_DSM
337286710 Thermodesulfatium\_indicum\_DSM\_15286
85858454 Syntrophus\_aciditrophicus\_SB
436839746 Desulfobacterium\_hydrothermalis\_AM13\_-\_DSM\_14728
134299483 Desulfotomaculum\_reducens\_MI-1
116627765 Streptococcus\_thermophilus\_LMD-9
37677206 Vibrio\_vulnificus\_YJ016
37677205 Vibrio\_vulnificus\_YJ016
427708212 Nostoc\_sp\_PCC\_7107
46255266 Thermus\_thermophilus\_HB27
159898908 Herpetosiphon\_aurantiacus\_DSM\_785
114567263 Syntrophomonas\_wolfei\_subsp\_wolfei\_str\_Goettingen
296133513 Thermicoccus\_potens\_JR
326793968 Marinomonas\_mediterranea\_MMB-1
302391603 Acetohalobium\_arabaticum\_DSM\_5501
75910375 Anabaena\_variabilis\_ATCC\_29413
19357847 Chlorobiumphaeobacteroides\_DSM\_266
38055685 Synechocystis\_sp\_PCC\_6803
337286707 Thermodesulfatium\_indicum\_DSM\_15286
119357852 Chlorobiumphaeobacteroides\_DSM\_266
344996858 Caldicellulophorus\_lactoaceticus\_6A
218442810 Cyanotheca\_sp\_PCC\_7424
17227878 Nostoc\_sp\_PCC\_7120



|           |                                                       |                |                                                                                                                              |                              |                 |                   |     |    |        |
|-----------|-------------------------------------------------------|----------------|------------------------------------------------------------------------------------------------------------------------------|------------------------------|-----------------|-------------------|-----|----|--------|
| 385805116 | Feravidicoccus_fontis_Kam940                          | ---GTS---      | KW                                                                                                                           | SAGSPEGSV                    | ---VLR---       |                   |     |    |        |
| 15922976  | Sulfolobus_tokodaii_str_-7                            | ---GDS---      |                                                                                                                              | VRREAVSLL                    | ---             |                   |     |    |        |
| 347523052 | Pyrolobus_fumaris_1A                                  | ---GEG---      | ANIP                                                                                                                         | GAKPKPGVT                    | ---LA---        |                   |     |    |        |
| 118431379 | Aeropyrum_pernix_K1                                   | ---GLG---      |                                                                                                                              | GSLEDGKRVV                   | ---VV---        |                   |     |    |        |
| 305663329 | Ignisphaera_aggregans_DSM_17230                       | ---GVN---      | RVE                                                                                                                          | INEQSYGVI                    | ---             |                   |     |    |        |
| 307595806 | Vulcanisaeta_distributa_DSM_14429                     | ---GTA---      | NL                                                                                                                           | AI PNEPTVI                   | ---             |                   |     |    |        |
| 302347807 | Acidilobus_saccharovorans_345-15                      | ---GRP---      | LAAP                                                                                                                         | RVAEVTLLG                    | ---             |                   |     |    |        |
| 124027532 | Hyperthermus_butyllicus_DSM_5456                      | ---GGI---      | MSDP                                                                                                                         | KQKQAVRVV                    | ---             |                   |     |    |        |
| 18311698  | Pyrobaculum_aerophilum_str_-1M2                       | ---GRP---      |                                                                                                                              | PYAPLKPKYQIY                 | ---VV---        |                   |     |    |        |
| 150398873 | Methanococcus_vannielii_SB                            | ---GQD---      | FD                                                                                                                           | RELINGEIT                    | ---TKFL---      |                   |     |    |        |
| 257125861 | Leptotrichia_buccalis_C-1013-b                        | ---GLS---      | FEQD                                                                                                                         | IVKDEKPVV                    | ---FF---        |                   |     |    |        |
| 150401498 | Methanococcus_aeolicus_Nankai-3                       | ---GEE---      | FDKD                                                                                                                         | LITDNKNTL                    | ---VL---        |                   |     |    |        |
| 21226660  | Methanosarcina_mazei_Gol                              | ---GOA---      | FD                                                                                                                           | KELVSEIIL                    | ---TKFF---      |                   |     |    |        |
| 218961576 | Candidatus_Cloacamonas_acidaminovorans_str_-Evry      | ---GOA---      | FDPA                                                                                                                         | LITDEIKAF                    | ---FL---        |                   |     |    |        |
| 284040852 | Spirosoma_linguale_DSM_74                             | ---GOA---      | FDKK                                                                                                                         | LVTDEIRAL                    | ---FF---        |                   |     |    |        |
| 15898244  | Sulfolobus_solfataricus_P2                            | ---GYSG---     | SE                                                                                                                           | REEKSNVWV                    | ---             |                   |     |    |        |
| 332668018 | Haliscomenobacter_hydrossis_DSM_1100                  | ---GSI---      |                                                                                                                              | EPDRDELSGSKSTL               | ---IV---        |                   |     |    |        |
| 386854796 | Deinococcus_gobiensis_I-0                             | ---GEA---      |                                                                                                                              | KNG                          | ---             |                   |     |    |        |
| 288560432 | Methanobrevibacter_ruminantium_M1                     | ---GNL---      |                                                                                                                              | DLPKKSLYE                    | ---FL---        |                   |     |    |        |
| 330509016 | Methanosarcina_concili_ii_GP6                         | ---GET---      |                                                                                                                              | YEVEEEDVS                    | ---VF---        |                   |     |    |        |
| 20094746  | Methanopyrus_kandleri_AV19                            | ---DAE---      | GV                                                                                                                           | RGLRF                        | ---             |                   |     |    |        |
| 11499460  | Archaeoglobus_fulgidus_DSM_4304                       | ---SNT---      | GV                                                                                                                           | ELVKEKQVE                    | ---FV---        |                   |     |    |        |
| 383319614 | Methanocella_conradii_HZ254                           | ---GGA---      |                                                                                                                              | CLVKESKQV                    | ---IV---        |                   |     |    |        |
| 148656005 | Roseiflexus_sp_RS-1                                   | ---GEE---      |                                                                                                                              | S                            | ---             |                   |     |    |        |
| 408403001 | Candidatus_Nitrososphaera_gargensis_Ga9-2             | ---GKE---      | FVE                                                                                                                          | EEKQDVQFP                    | ---             |                   |     |    |        |
| 167628643 | Helibacterium_modesticaldum_Icel                      | ---ELLVVDGG--- |                                                                                                                              | EASC                         | ---             |                   |     |    |        |
| 170290048 | Candidatus_Korarchaeum_cryptofilum_OPF8               | ---GRF---      |                                                                                                                              | KFRKQPP                      | ---             |                   |     |    |        |
| 126465228 | Staphylothermus_marinus_P1                            | ---K---        | GSI                                                                                                                          | ---KHGEP                     | ---             |                   |     |    |        |
| 327314605 | Prevotella_denticola_P0289                            | ---GED---      | ISID                                                                                                                         | VII RSRNTL                   | ---FF---        |                   |     |    |        |
| 392395715 | Flexibacter_litoralis_DSM_6794                        | ---GNN---      | IPFL                                                                                                                         | DAVDDKVKV                    | ---IF---        |                   |     |    |        |
| 34541576  | Porphyromonas_gingivalis_W83                          | ---GHP---      |                                                                                                                              | TLPKSRKKRSIVV                | ---             |                   |     |    |        |
| 288947692 | Allochromatium_vinosum_DSM_180                        | ---L---        | GDG                                                                                                                          | EAAT                         | ESRPSAPGW       | RALTTPPPVLPFTRSQS |     |    |        |
| 379728402 | Saprosira_grandis_str_-Lewin                          | ---GES---      |                                                                                                                              | EDLRLLDELLFI                 | ---LL---        |                   |     |    |        |
| 431929778 | Thioflavococcus_mobilis_8321                          | ---V---        | TRC                                                                                                                          | AR                           | IGFRKPALY       | ---LD---          |     |    |        |
| 288947691 | Allochromatium_vinosum_DSM_180                        | ---GKG---      | RT                                                                                                                           | TALQDGLLL                    | ---AA---        |                   |     |    |        |
| 269798875 | Veillonella_parvula_DSM_2008                          | ---NKI---      |                                                                                                                              | IPLTEDKML                    | ---II---        |                   |     |    |        |
| 30248143  | Nitrosomonas_europaea_ATCC_19718                      | ---GNA---      |                                                                                                                              | STPTVQHFC                    | ---IV---        |                   |     |    |        |
| 206889468 | Thermodesulfovibrio_yellowstonii_DSM_11347            | ---GIA---      |                                                                                                                              | VPPIDPEYFY                   | ---IG---        |                   |     |    |        |
| 121997422 | Halorhodospira_halophila_SL1                          | ---GAA---      |                                                                                                                              | EVPAADPDF                    | ---YPG---       |                   |     |    |        |
| 292492855 | Nitrosococcus_halophilus_Nc_4                         | ---GIA---      | VKPV                                                                                                                         | DPAFFY                       | ---VG---        |                   |     |    |        |
| 430760779 | Thioalkalivibrio_nitratireducens_DSM_14787            | ---GKA---      | QAPS                                                                                                                         | DPDLFY                       | ---LG---        |                   |     |    |        |
| 317051220 | Desulfurispirillum_indicum_S5                         | ---GTG---      |                                                                                                                              | LSRMAKTQAP                   | ---             |                   |     |    |        |
| 118497968 | Francisella_novicida_U112                             | ---GYA---      |                                                                                                                              | IHRBQEVVF                    | ---ID---        |                   |     |    |        |
| 76802277  | Nitrosomonas_pharaonis_DSM_2160                       | ---I---        | GND                                                                                                                          | PP                           | D               | GQSNV             |     |    |        |
| 162457463 | Sorangium_cellulosum_Sc_cel56                         | ---GND---      |                                                                                                                              | LTFLEDPEPPFV                 | ---             |                   |     |    |        |
| 347756304 | Candidatus_Chloracidobacterium_thermophilum_B         | ---STK---      | TSWD                                                                                                                         | BEERKRIEIL                   | ---             |                   |     |    |        |
| 24215881  | Leptospira_interrogans_serovar_Lai_str_-56601         | ---EKK---      | SAMP                                                                                                                         | EAPKTLKIL                    | ---             |                   |     |    |        |
| 312114616 | Rhodomicrobium_vannielii_ATCC_17100                   | ---NPI---      |                                                                                                                              | NDIADLJKA                    | ---IL---        |                   |     |    |        |
| 218884092 | Desulfurococcus_kamchatkensis_1221n                   | ---F---        | GKP                                                                                                                          | LA                           | EITVHEGVM       | ---VIT---         |     |    |        |
| 431929779 | Thioflavococcus_mobilis_8321                          | ---Y---        | GGA                                                                                                                          | PAEA                         | ERPRGRRWL       | KGLFGREAA         |     |    |        |
| 39995169  | Geobacter_sulfurreducens_PCA                          | ---GKT---      |                                                                                                                              | FD                           | PILRQAVIV       | ---               |     |    |        |
| 83591518  | Rhodospirillum_rubrum_ATCC_11170                      | ---GKA---      |                                                                                                                              | FE                           | TLERQAMII       | ---               |     |    |        |
| 332661940 | Haliscomenobacter_hydrossis_DSM_1100                  | ---L---        | GQE                                                                                                                          | MDTR                         | LLLKGRDYL       | ---IL---          |     |    |        |
| 261415949 | Fibrobacter_succinogenes_subsp_-succinogenes_S85      | ---GCG---      |                                                                                                                              | KRIENPAFK                    | ---VL---        |                   |     |    |        |
| 121997420 | Halorhodospira_halophila_SL1                          | ---GLV---      |                                                                                                                              | LPGLSLRPQFPPEAD              | ---             |                   |     |    |        |
| 302343125 | Desulfarculus_baarsii_DSM_2075                        | ---GVT---      |                                                                                                                              | APPQSHDYV                    | ---FV---        |                   |     |    |        |
| 389875623 | Tistrella_mobilis_KA081020-065                        | ---GGP---      |                                                                                                                              | PLPEPADYV                    | ---LL---        |                   |     |    |        |
| 374998938 | Azospirillum_lipoferum_4B                             | ---GAA---      |                                                                                                                              | PVPEQQDFW                    | ---LL---        |                   |     |    |        |
| 294676822 | Rhodobacter_capsulatus_S8_1003                        | ---D---        | GAA                                                                                                                          | PI                           | E               | PPGNVY            |     |    |        |
| 288957882 | Azospirillum_sp_B510                                  | ---GAA---      |                                                                                                                              | PLAEPQDFY                    | ---LL---        |                   |     |    |        |
| 313790503 | Thermovibrio_ammonificans_HB-1                        | ---GEE---      | YEDLMDKWEKLGRLTRKFPYFLRDTLEMEIKSGKFSYLLVYDIDSNLIRIKRFSIDLEEFSEKRVQSAFVSPASPNVARIAMVAMQAFEAIDNLLKVVLYPIDKGEKKIIRIGSSVYSPFRDIL | ---                          |                 |                   |     |    |        |
| 108759816 | Mycococcus_xanthus_DK_1622                            | ---GAB---      | AP                                                                                                                           | LDVSPIL                      | ---             |                   |     |    |        |
| 15612905  | Bacillus_halodurans_C-125                             | ---GAK---      | PS                                                                                                                           | IDLEDPLIF                    | ---             |                   |     |    |        |
| 189485224 | uncultured_Termite_group_1_bacterium_phylotype_Rs-D17 | ---GCK---      | KP                                                                                                                           | VDLHETLII                    | ---             |                   |     |    |        |
| 86742033  | Frankia_sp_CcI3                                       | ---GAG---      |                                                                                                                              | VQ                           | PVHRADHII       | ---               |     |    |        |
| 433631662 | Mycobacterium_canettii_CIPT_140070010                 | ---GRG---      |                                                                                                                              | PE                           | VDWRSPIVL       | ---               |     |    |        |
| 333996013 | Treponema_azotonutricium_ZAS-9                        | ---GNN---      | TL                                                                                                                           | PPVSSYEIL                    | ---             |                   |     |    |        |
| 328949008 | Treponema_succinificans_DSM_2489                      | ---GNG---      |                                                                                                                              | NIFPKTFE                     | ---IL---        |                   |     |    |        |
| 337288661 | Thermodesulfovibrio_geofontis_OPF15                   | ---GYP---      |                                                                                                                              | LEPWKIFII                    | ---             |                   |     |    |        |
| 319790501 | Thermovibrio_ammonificans_HB-1                        | ---GKR---      |                                                                                                                              | EETKTPM                      | ---             |                   |     |    |        |
| 283778925 | Pirellula_staley_i_DSM_6068                           | ---QRE---      |                                                                                                                              | LRRMDAVI                     | ---VL---        |                   |     |    |        |
| 386750120 | Helicobacter_cetorum_MIT_00-7128                      | ---I---        | GEK                                                                                                                          | RGIF                         | K               | PYDDFI            |     |    |        |
| 220934971 | Thioalkalivibrio_sulfidophilus_HB_EbGr7               | ---S---        | GEP                                                                                                                          | LSPL                         | P               | AVI               |     |    |        |
| 15609953  | Mycobacterium_tuberculosis_H37Rv                      | ---GRG---      |                                                                                                                              | RLVSAEEFV                    | ---FF---        |                   |     |    |        |
| 85858453  | Syntrophus_aciditrophicus_SB                          | ---S---        | GLG                                                                                                                          | LK                           | V               | TQLEYT            |     |    |        |
| 268318440 | Rhodothermus_marinus_DSM_4252                         | ---GCO---      |                                                                                                                              | KLPEMKNVF                    | ---LT---        |                   |     |    |        |
| 320102062 | Isosphaera_pallida_ATCC_43644                         | ---GLP---      | YA                                                                                                                           | PLDAPCVVV                    | ---             |                   |     |    |        |
| 378719040 | Gordonia_polyisoprenivorans_VH2                       | ---GRP---      |                                                                                                                              | RTLPAAGPM                    | ---VV---        |                   |     |    |        |
| 134101618 | Saccharopolyspora_erythraea_NRRL_2338                 | ---GRR---      |                                                                                                                              | HGLPTTQHR                    | ---VL---        |                   |     |    |        |
| 336116790 | Microtholmus_rhothovorus_WM-1                         | ---GGA---      |                                                                                                                              | YDPTQFV                      | ---AVL---       |                   |     |    |        |
| 268318377 | Rhodothermus_marinus_DSM_4252                         | ---GQG---      |                                                                                                                              | RGIDLRQDHWIV                 | ---             |                   |     |    |        |
| 83592489  | Rhodospirillum_rubrum_ATCC_11170                      | ---L---        | GAT                                                                                                                          | VEKP                         | V               | HE                | PWI |    |        |
| 206890293 | Thermodesulfovibrio_yellowstonii_DSM_11347            | ---GVG---      |                                                                                                                              | DRIPDGVEV                    | ---FY---        |                   |     |    |        |
| 52425689  | Mannheimia_succiniciproducens_MBEL55E                 | ---GKN---      |                                                                                                                              | PMPEGIVLSTFVF                | ---             |                   |     |    |        |
| 30248141  | Nitrosomonas_europaea_ATCC_19718                      | ---I---        | GRP                                                                                                                          | T                            | LP              | E                 | GIO | WS | GLPAKW |
| 292492858 | Nitrosococcus_halophilus_Nc_4                         | ---GRG---      |                                                                                                                              | APPEGIYLVFAGGVDFLEALEQNEQLTR | ---             |                   |     |    |        |
| 430760782 | Thioalkalivibrio_nitratireducens_DSM_14787            | ---GRG---      |                                                                                                                              | ALPDGALLQSHENPGL             | ---VTLQLALAE--- |                   |     |    |        |
| 348026606 | Megasphaera_elsdenii_DSM_20460                        | ---GRG---      |                                                                                                                              | DTHTEDVI                     | ---IL---        |                   |     |    |        |
| 317051218 | Desulfurispirillum_indicum_S5                         | ---GIG---      |                                                                                                                              | DFNRSEIIL                    | ---VI---        |                   |     |    |        |
| 337286710 | Thermodesulfator_indicus_DSM_15286                    | ---GWG---      | ELP                                                                                                                          | EEPEEDVIL                    | ---             |                   |     |    |        |
| 85858454  | Syntrophus_aciditrophicus_SB                          | ---GQG---      |                                                                                                                              | FYTNDEEYV                    | ---IY---        |                   |     |    |        |
| 436839746 | Desulfovibrio_hydrothermalis_AM13_-DSM_14728          | ---GNA---      | PP                                                                                                                           | RINENYSFV                    | ---I---         |                   |     |    |        |
| 134299483 | Desulfotomaculum_reducens_MI-1                        | ---GNC---      |                                                                                                                              | SDPPGDGIV                    | ---IV---        |                   |     |    |        |
| 116627765 | Streptococcus_thermophilus_LMD-9                      | ---HSA---      |                                                                                                                              | EKLLDILFF                    | ---             |                   |     |    |        |
| 37677206  | Vibrio_vulnificus_YJ016                               | ---GAG---      |                                                                                                                              | QVYWPDAL                     | ---LIDE---      |                   |     |    |        |









219683006|Bifidobacterium\_animalis\_subsp\_lactis\_AD011 -RKSDEEAYGSVQEVKRLIECETAPLPFFED---DPRCM-RCSHAGI--CLPEERAHNIPE  
347756303|Candidatus\_Chloracidobacterium\_thermophilum\_B -DDAARQELRAAVARAARLQRIERPPVTS---VRLCR-HCALAPV--CLPEEDRLAVIT  
294828260|Leptospira\_interrogans\_serovar\_Lai\_str\_56601 -DEELRSKALKITIDRAGLSTSNRPPVAQN---ENLCK-NCSLAPV--CLPEETRVLITEN  
268318441|Rhodothermus\_marinus\_DSM\_4252 -DEELTFPTRESLEQLRQVAVRQVPPPPLED---SPKCP-RCSLVGI--CLPDETHLQQE  
378719041|Gordonia\_polyisoprenivorans\_VH2 -GNTEVAVAVEIADEAREVASRENAPLPLVG---SKRCP-RCSLGL--CMPDETALLRR  
320102061|Isosphaera\_pallida\_ATCC\_43644 -DSDLIATTLRALDEARQLARSQITPPPLVD---SPKCP-RCSLVGI--CLPDETNLLRNS  
39995168|Geobacter\_sulfurreducens\_PCA -DDELIGRTLAAIDEMGRALSGTMMPPLED---SPKCP-RCSLVGI--CLPDEVRFLSHL  
83591519|Rhodospirillum\_rubrum\_ATCC\_11170 -TEALVFTLVAISDRLIVASGRLLPPLLDH---SAKCP-RCSLLPI--CLPDELAWFKG  
108757432|Myxococcus\_xanthus\_DK\_1622 -DDELRRQTEBIALARMHEVLRQEVVVVRA---PRCD-KCSLEPL--CLPQVTAQRS  
46255268|Thermus\_thermophilus\_HB27 -TPELFRVAEAAVVRMRLALQSPRRVVEVP---PSKCE-GCSVQGA--CQPELWRKVAG  
159898754|Herpetosiphon\_aurantiacus\_DSM\_785 -DPQLRQKTIALIEQAHAICQRGELPAPTSQ---KGKCR-DCSLKPL--CLPDEVAYLTH  
38505683|Synechocystis\_sp\_PCC\_6803 -TQALRNMTQAI-IAAHLACNGMPMPRIAN---TKKCA-DCSLERL--CLPKELKLLTK  
17229059|Nostoc\_sp\_PCC\_7120 -NQELRSALATIQAVTNLLTITGIMPINYS---KRCQ-GCSLNLQ--CLPKAIDRVKTY  
302391601|Acetohalobium\_arabaticum\_DSM\_5501 -DLKLRDKTLETGSEVSLKIMEGVEVINEYS---RRCR-ACSIIEI--CLPKVSIILKKG  
48477076|Picrophilus\_torridus\_DSM\_9790 -NDENLNELYKSYENIDKLDMAKPPPEVRN---YFCVHGCSYDF--CWC-----  
154174706|Campylobacter\_curvus\_525-92 -SEENFNALETLLREITLAVLNLAQPKFTTQ---KICK-NCAYNGY--CA-----  
111224946|Frankia\_alni\_ACN14a -DDDARRSALETETQARAVISAPAVPRLER---RRCR-GCSYTDY--CWG-----  
389844446|Mesotoga\_prima\_MesG1-Ag-4-2 -TEEDEEQRIRDLDEIKTIFNLNAPLPLFK---EGCK-GCSYFDL--CFS-----  
268317193|Rhodothermus\_marinus\_DSM\_4252 -TADDEARLRTLQVQLRQTAARPTPPSRLN---RRFC-KCAVEEL--CPG-----  
28211140|Clostridium\_tetani\_B88 -DENNLELEDVTKINENLLIQENPPPEVINE---SKCK-KCAVEYF--CYI-----  
41614818|Nanoarchaeum\_equitans\_Kin4-M -TEKDERKIKELINEIKRISMDKPPREVPK---DYCK-ACAYYPL--CWEGY-----  
289596695|Aciduliprofundum\_boonei\_T469 -NEENKKIEIDLKEMEVEIKGKERPPKPVNR---KICE-KCSYLEL--CWA-----  
18977491|Pyrococcus\_furiosus\_DSM\_3638 --EGREREVEAIVEEVIVKSSSKPPKPKS---KICR-KCAVEEL--CWG-----  
14590111|Pyrococcus\_horikoshii\_OT3 -KEENIKVIEBAIKGIEEVVSSPKPPKPKV---PYCR-KCSYRDL--CWV-----  
21226277|Haloarcula\_marismortui\_ATCC\_43049 -TDENRWVEAARGIVDVTSDSPPAEEK---PFCE-SCAYHDF--CWSC-----  
84489235|Methanospaera\_stadtmanae\_DSM\_3091 -TEDIIKEIDDIKELIKKISNEKPPHEKQK---PYCQ-GCSFREL--CLI-----  
292492937|Nitrosococcus\_halophilus\_Nc\_4 -DEARMQQLWESSERLERLAQQTQVPSAKRI---FLCA-SCSLAAP--CGYD-----  
385805117|Fervidicoccus\_fontis\_kam940 -SYELHISARHLVERLKLKLDSPTPPSASYG---GKCS-YCFPKSV--CSSSNQPAEIL--  
347523047|Pyrolobus\_fumarii\_LA -DWGSFSIVERLVERLETVSRLPPLPVTPQ---PEKCL-ACRWRWR--CPERSV-----  
15898285|Sulfolobus\_solfataricus\_P2 -RKEHVEYIKGVNVELVESLEDDSPVNVNS---PLLCK-ACQYRRV--CSVSVLL-----  
15922977|Sulfolobus\_tokodaii\_str\_7 -TEEHYRYIENVVKIEEIVNSEKLPVAVNE---KCD-FCQYRRI--CPVSVMS-----  
302347806|Acidilobus\_saccharovorans\_345-15 -DGHVREAEELVARVDRVLESEPPRAYRS---ERCS-SCWFRVR--CPAWD-----  
218884091|Desulfurococcus\_kamchatkensis\_1221n -NDQLVRDVEASIRSERMISSESLPKPGEQ---GKCS-SCWYRRF--CPYA-----  
389861366|Thermogladius\_cellulolyticus\_1633 -TGEIVVEARRYLGELEALASSDRPPQPTRP---GRCS-SCWYRRF--CPYTE-----  
156937923|Ignicoccus\_hospitalis\_KIN4-I -SY-SLREHVKYGLLEALERDLVLPGRPS---RYCS-YCKYSSL--CPWRPP-----  
15896973|Sulfolobus\_solfataricus\_P2 -YEINEPLDEATIVRAEDTLMQNSPRFN---WECK-YCIFSVI--CPAKLT-----  
18311697|Pyrobaculum\_aerophilum\_str\_IM2 -SKAELKAAETLLVKAAEVIEGPPPPPKVTG---KCA-YCQYRAI--CTPT-----  
170290049|Candidatus\_Korarchaeum\_cryptofilum\_OPF8 -GDSERFVLGATEKRRIME-GEIPRAYRS---RSCE-NCDFKNR--CLEI-----  
126465229|Staphylothermus\_marinus\_P1 -TSNDRNYIIKTLNEMKTLLEEQTTPKPTPS---KSCI-NCDYKNI--CPYQTKNQ-----  
257125860|Leptotrichia\_buccalis\_C-1013-b -TNKNLEKVKESAALKIETERYPIEIEG---GTKCR-DCYKIKI--CGR-----  
124027531|Hyperthermus\_butyllicus\_DSM\_5456 -TPMLRKMVEDAARELHEMLQRGEPLQHYTVS---PRRCV-VCSYRGV--CTYART-----  
18311770|Pyrobaculum\_aerophilum\_str\_IM2 -TRDLVELVKHTAQQIRKIQNGWPTPAYHP---AKCP-SCWYRKY--CGFTSPHVEKI--  
284040853|Spirosoma\_linguale\_DSM\_74 -AETDKVAVKRAEAIFPIIERNFYKATKA---KARCV-TCTYRNI--CIK-----  
21226659|Methanosarcina\_mazei\_Go1 -TSSDFKAAKILIEILDIVQKGLYKTSRS---SRKCV-DCCYRNI--CV-----  
218961575|Candidatus\_Cloacamonas\_acidaminovorans\_str\_Evry -TPKMLDKAKLILBEIFMIIINLEKYPKPAKA---KPKCL-DCYRNL--CSV-----  
150401499|Methanococcus\_aeolicus\_Nankai-3 -KKDKDFDAVAVFDLIFDIENEPEDDGIKVN---KRCIC-DCCYRNV--CCK-----  
118497355|Francisella\_novicida\_U112 -TDELINLKITISDILSTLDSGNKPKDSSAS---DHQCI-QCEYVNF--CNDP-----  
34557935|Wolinella\_succinogenes\_DSM\_1740 -SDGDKAEINNVKIKIEMIIEGLNLDHSSAD---GSKCT-QCEPLNV--CNDP-----  
54296141|Legionella\_pneumophila\_str\_Paris -DEKSKFPIEIECAKIKKIFGTETLPYSTAN---GLQCI-QCEPLNH--CNDP-----  
167628644|Helibacterium\_modesticaldum\_Ice1 -TVPMRDFVKDLRIRIRAMVQESLPSKRP---GNRC-DCEYRVY--CLLDGVDVR---  
386854795|Deinococcus\_gobiensis\_I-0 -DTRLRNRTRAAIQVVRGPIIAEQCPSPPTAQ---TVKCL-ECELRNF--CGDTL-----  
148656006|Roseiflexus\_sp\_RS-1 -SAALRTRVKETVAARATVDHERMPPPPAS---RRQCA-VCEFRFR--CNDVV-----  
118431378|Aeropyrum\_pernix\_K1 -SPSLRRDVRIRLADDMNKTLDDGLEPPPKPG---RRKCV-ACRFRVR--CQPWAERGSER  
307595805|Vulcanisaeta\_distributa\_DSM\_14429 -TPNLRTWIKRTIQDMKHHIQEQEPPPKTIN---KAKCK-ACYFKDI--CPP-----  
305663328|Ignisphaera\_aggregans\_DSM\_17230 -SPNLRRITINIVEEFKYYIQQKPPPKPTM---KTRCN-HCFYRKI--CV-----  
408403002|Candidatus\_Nitrososphaera\_gargensis\_Ga-2 -TESMKTYLKKTVKAIQNVIESEGEPPVARIIP---KSRCTGGCGYLWI--CGGIWNRH---  
330509015|Methanoseta\_coccilii\_GP6 -GDEIRRTLKMIEKIAQIIEDEIEPAGTRN---SARCI-DCEYRKY--CVGNILPKPHTE  
11499461|Archaeoglobus\_fulgidus\_DSM\_4304 -SPDDRKALLRIKIEIRLIEEKEYPRTSKS---KKCG-YCEVREF--CV-----  
383319611|Methanocella\_conradii\_HZ254 -TCEGEMVKQDIRKIKDLIKSEKMPNVNKG---LQCN-YCEMAKF--CS-----

**Supplementary Figure S2: Cas1, Cas2, Cas4 phylogenetic trees** (please see Supplementary Materials and Methods for details and also see Makarova KS, Wolf YI, Koonin EV. **The basic building blocks and evolution of CRISPR-Cas systems.** Biochem Soc Trans. 2013 Dec 1;41(6):1392-400); Sequences are denoted by Genbank identifiers and organism genus and abbreviated species name; automatically identified CRISPR-Cas system subtype and gene in the Cas1 neighborhood are provided). The trees are provided in Newick format, could be open in any tree-viewing software.

### Cas1 Tree:

```
((347756303|CAS-I-C|Chloracidobacterium_the_6-3-8c-7-5-1+4-2:0.38914,(294828260|CAS-I-C|Leptospira_int_1+4-2-x-x-6-3-8c-7-5:0.54801,162457462|CAS-I-C|Sorangium_cel_6-3-8c-7-5-1-2:0.50926)0.895:0.13172)1.000:0.61947,((15612904|CAS-I-C|Bacillus_hal_cmr5SS-cmr6g7-x-x-x-3-5-8c-7-4-1-2:0.64423,108763792|CAS-I-C|Myxococcus_xan_2-1-4-7-8c-5-3HD:0.49951)0.765:0.13333,(86742032|CAS-I-C|Frankia_CcI_3-5-8c-7-4-1-2:0.71514,433631663|CAS-I-C|Mycobacterium_can_2-1-4-7-8c-5-3:0.60677)0.734:0.20305)0.990:0.32273)0.717:0.14616,(219683006|CAS-I-U|Bifidobacterium_ani_3-csb1-1+4:1.07926,((378719041|CAS-I-U|Gordonia_pol_2-1+4-csb2-csb1-8-3:0.51986,134101617|CAS-III-A|Saccharopolyspora_ery_1+4-2-x-x-x-csm3g7-cmr3g5-csm3g7-10:0.62705)0.819:0.11364,(268318441|unknown|Rhodothermus_mar_2-1+4:0.43464,312114617|CAS-III-A|Rhodomicrobium_van_RT-2-1-csm3g7-csx19-csm3g7-csm3g7-10-x-csm6-csx1-x-csx16:1.15334)0.817:0.13822)0.378:0.07072,(320102061|CAS-I-U|Isosphaera_pal_1+4-2-csb2:0.57635,(39995168|CAS-I-U|Geobacter_sul_3-8-csb1-csb2-x-x-1+4-2:0.33269,83591519|CAS-I-E|Rhodospirillum_rub_2-1-6e-5-7-cse2SS-8e-3-x-x-2-1+4-csb2-x-csm3g7-csm3g7-10:0.61850)0.935:0.13614)0.960:0.17395)0.813:0.13734)0.850:0.11671,((38505684|CAS-I-D|Synechocystis_PCC_3-10d-csc2g7-csc1g5-6-4-1-2:0.83136,(344996859|CAS-I-D|Caldicellulosiruptor_lac_2-1-4-6-3-csc1g5-csc2g7-10d:0.90289,46255267|CAS-I-A|Thermus_the_2-1-4-x-8a-7-5-6:0.82022)0.822:0.10403)0.844:0.08986,((302391602|CAS-I-D|Acetohalobium_ara_10d-csc2g7-csc1g5-3-4-1-2-6:0.44986,17229060|CAS-I-D|Nostoc_PCC_10d-csc2g7-csc1g5-3-2OG-6-4-1-x-2:0.80140)0.816:0.13790,159898755|CAS-I-D|Herpetosiphon_aur_10d-csc2g7-csc1g5-3-6-4-1-2:0.73922)0.853:0.07489,134299482|CAS-III-A|Desulfotomaculum_red_1+4-2-10-csm2SS-csm3g7-csm4g5-csx1-6:0.60078)0.965:0.13680)0.386:0.06285,((268318378|CAS-III-U|Rhodothermus_mar_csx1-csx20-x-x-csx1-csx1-6-x-2-1+4:0.71035,(336116789|CAS-III-A|Microlunatus_pho_10-csm3g7-cmr3g5-csm3g7-x-x-x-6-1+RT-2-x-10-csm3g7-cmr3g5-csm3g7:1.15764,(55978328|CAS-III-A|Thermus_the_csx1-1-x-10-csm2SS-csm3g7-csm4g5-csm5g7-csx1-x-x-csx1:0.32915,297622675|CAS-III-U|Truepera_rad_2-1-csx1-csx1-6:0.65702)0.999:0.43981)0.614:0.14144)0.987:0.24355,((76802276|CAS-I-D|Natronomonas pha_R-6-10d-csc2g7-csc1g5-3-4-1-2:1.07764,(390962116|CAS-III-A|Thermococcus_CL1_6-10-csm2SS-csm3g7-csm4g5-csm5g7-R2-csx3-2-1:1.08282,(154174048|CAS-I-B|Campylobacter_cur_1-2-4-3-5-7-8-6:1.20432,(((28211139|CAS-I-B|Clostridium_tet_1-4-3-5-7-8b-6:0.80992,(18977490|CAS-III-B|Pyrococcus_fur_2-1-4-3-5-7-8b-cmr6g7-cmr5SS-cmr4g7-csm6-cmr3g5:0.60617,((84489236|CAS-I-B|Methanosphaera_sta_6-8-7-5-3-4-1-2:0.38030,(289596694|CAS-III-A|Aciduliprofundum_boo_2-1-4-6-csx1-csx1-csm5g7-csm4g5-csm3g7-csm2SS-10:0.63757,13540937|CAS-III-A|Thermoplasma_vol_2-1-csx1-csm5g7-csm4g5-csm3g7-csm2SS-10-6-csm6:0.86508)0.905:0.15392)0.906:0.14613,14590110|CAS-III-A|Pyrococcus_hor_10-csm2SS-csm3g7-csm4g5-csm5g7-csm6-8b-7-5-x-1-2-4-3-csx1:0.63787)0.819:0.15012,41614813|CAS-I-B|Nanoarchaeum_equ_2-1-x-7-5-3-4:0.77636)0.073:0.03836)0.175:0.14006)0.656:0.10760,268317185|CAS-III-A|Rhodothermus_mar_2-1-x-csx1-csm5g7-csm4g5-csm3g7-csm2SS-10-4-3-5:0.62102)0.325:0.06368,(385809790|CAS-III-U|Ignavibacterium_alb_csm5g7-x-csx1-csx20-csx1-csx1-x-x-x-1-2:0.72273,150021526|CAS-III-B|Thermosiphon_mel_2-1-2-x-x-x-csm6-cmr1g7-10-cmr3g5-cmr4g7-cmr5SS:0.71602)0.932:0.15479)0.396:0.05380,(389844445|CAS-III-B|Mesotoga_pri_cmr6g7-cmr5SS-cmr4g7-cmr3g5-10-cmr1g7-csm6-2-x-x-1-4-3-5-7:0.68628,48477075|CAS-I-D|Picrophilus_tor_2-1-4-3-csc1g5-csc2g7-10d-6:0.97627)0.470:0.06969)0.718:0.10249,(55376278|CAS-I-B|Haloarcula_mar_6-8-7-5-3-4-1-2:0.65921,(292492938|CAS-I-D|Nitrosococcus_hal_6-10d-csc2g7-x-3-4-1-2:1.06977,111224947|CAS-I-B|Frankia_aln_6-x-7-3+5-4-1-2:1.01974)0.382:0.12937)0.495:0.16546)0.929:0.19711)0.540:0.12245)0.997:0.40897)0.849:0.17499,(((317051217|CAS-III-A|Desulfurispirillum_ind_10-csm2SS-csm3g7-csm4g5-csm5g7-x-x-csx1-csx20-x-1-2-x-2:0.86471,17227877|CAS-III-B|Nostoc_PCC_csx18-1-2:0.92025)0.768:0.14478,((85858452|CAS-III-B|Syntrophus_aci_cmr5SS-cmr6g7-csm6-csx1-x-x-x-x-x-1-2:0.74830,(328949009|CAS-III-A|Treponema_suc_csx1-x-x-2-2-1-x-x-x-csx20-csx1-x-csm5g7-csm4g5-csm3g7-csm2SS:0.38670,333996012|CAS-III-B|Treponema_azo_csx20-csx1-cmr6g7-cmr5SS-cmr4g7-cmr3g5-10-cmr1g7-6-x-1-2-x-csx1:0.43621)1.000:0.46620)0.996:0.33602,(328953422|CAS-III-A|Desulfobacca_ace_csm5g7-csm6-x-csx20-csx1-x-x-x-Prim2+x-x-1-2:0.58824,(313673559|CAS-III-A|Calditerrivibrio_nit_2-Prim2-1-x-x-x-x-x-x-csx20-csm5g7:0.86969,218961167|CAS-III-A|Cloacamonas_aci_csm5g7-csa3-csx1+x-x-x-x-x-Prim2-x-1-2:0.68621)0.862:0.17223)0.840:0.15794,(154250301|unknown|Fervidobacterium_nod_1:0.90611,116748794|CAS-III-A|Syntrophobacter_fum_csm5g7-csm4g5-csm3g7-csm2SS-10-6-csx20-csx1-x-Prim2-1-2:0.93083)0.434:0.06593)0.080:0.06603)0.699:0.08120,(332296542|CAS-III-A|Thermodesulfobium_nar_4-x-2-1-Prim2-csm5g7-csm4g5-csm3g7-csm2SS-10-csx1-csx1-6:0.88721,337286709|CAS-III-B|Thermodesulfator_ind_cmr5SS-cmr4g7-x-x-cmr3g5-10-cmr1g7-x-2-x-1-2-6:0.72067)0.539:0.11721)0.713:0.06506)0.646:0.10342,(((148657121|CAS-III-U|Roseiflexus_RS_2-x-1-RT-x-x-x-csx15-csx1-x-csx1:0.61021,159898907|unknown|Herpetosiphon_aur_RT-1-2:0.55145)1.000:0.38100,(320161859|CAS-III-A|Anaerolinea_the_csx1-10-csm2SS-csm3g7-csm4g5-csm5g7-csx1-csx1-csx15-6-1-2:0.68967,(156741961|CAS-III-A|Roseiflexus_cas_10-csm2SS-csm3g7-csm4g5-csm5g7-csx1-6-1-2:0.47789,383762167|CAS-III-A|Caldilinea_aer_2-1-6-csx15-x-csx1-csm5g7-csm4g5-csm3g7-csm2SS-10-csx1:0.57444)0.084:0.08868)0.989:0.24410)0.762:0.09771,37677204|CAS-III|Vibrio_vul_6-csm3g7-x-csm3g7-5g10-cmr4g7-10-x-x-1+RT-2-2-csx1-csx16-csm6:1.23121)0.614:0.07387)0.702:0.04517,(((296133514|CAS-III-A|Thermincola_pot_2-1-csm6-6-csm5g7-csm4g5-csm3g7-csm2SS-10:0.55968,(348026605|CAS-III-A|Megasphaera_els_1-2-10-csm2SS-csm3g7-csm4g5-csm5g7-6-
```

cs6:0.72836,114567264|CAS-III-A|Syntrophomonas\_wol\_\_csm6-x-2-1-x-6-csm5g7-csm4g5-csm3g7-csm2SS-10:0.55211|0.097:0.09427|0.924:0.14860,(116627764|CAS-III-A|Streptococcus\_the\_\_1-2-6-csm2SS-csm3g7-csm4g5-csm5g7-x-csm6:1.15855,15609954|CAS-III-A|Mycobacterium\_tub\_\_2-1-csm6-csm5g7-csm4g5-csm3g7-csm2SS-10-6:0.80127|0.948:0.34739|0.991:0.30794,(218442809|CAS-III-A|Cyanotheca\_PCC\_\_csm6-x-x-RT-1-2:0.82366,(38505760|CAS-III-B|Synechocystis\_PCC\_\_cmr6g7-cmr5SS-cmr4g7-x-cmr3g5-10-csx18-1-2:1.05148,((119357853|CAS-III|Chlorobium\_pha\_\_2-1-6:0.57832,119357846|CAS-III-A|Chlorobium\_pha\_\_6-csx1-csm5g7-csm4g5-csm3g7-csm2SS-10-x-csx15-csx1-1+RT-2:0.71133|0.908:0.16639,(427708213|CAS-III|Nostoc\_PCC\_\_csx19-csm3g7-x-x-x-6-x-x-x-2-1-x-x-1+RT:1.09536,17228961|CAS-III-A|Nostoc\_PCC\_\_1+RT-x-x-x-csm3g7-csx19-csm3g7-csm3g7-x-csm3g7-csm3g7:0.37340|0.986:0.34526|0.475:0.09413|0.277:0.05347|0.828:0.10795|0.964:0.17610,(328953000|CAS-III|Desulfobacca\_ace\_\_6-x-x-x-x-RT-x-x-1-2:0.79732,(261415948|CAS-III-A|Fibrobacter\_suc\_\_1-2-x-x-csx1-10-csm3g7-x-csm3g7-csx20:0.76621,269798874|CAS-III-A|Veillonella\_par\_\_6-csm3g7-csx19-csm3g7-5g10-csm3g7-10-csx20-1-2-x-csx1-csx1:1.17138|0.843:0.22745|0.760:0.16672|0.679:0.01909|0.789:0.04869,(((326793969|CAS-III-B|Marinomonas\_med\_\_2-6-x-x-cmr6g7-cmr5SS-cmr4g7-cmr3g5-10-cmr1g7:0.97163,220934970|CAS-III-B|Thioalkalivibrio\_sul\_\_cmr1g7-10-cmr3g5-cmr4g7-cmr5SS-cmr6g7-csx1-x-csx1-x-1-2-x-csx1:0.60767|0.999:0.58432,((436839745|CAS-III-B|Desulfobivrio\_hyd\_\_1+RT-2-x-x-cmr6g7-cmr5SS-cmr4g7-cmr3g5-10-cmr1g7:1.37288,(283778924|CAS-III-A|Pirellula\_sta\_\_1+RT-2-x-10-csm3g7-csm3g7:1.45956,118497969|unknown|Francisella\_nov\_\_2OG-x-x-x-csa3-2-1-4:1.55280|0.320:0.28782|0.806:0.12534,(319790504|unknown|Thermovibrio\_amm\_\_2-2-2-1:1.30366,337288662|CAS-III-A|Thermodesulfobacterium\_OPB\_\_10-csm2SS-csm3g7-csm4g5-csm5g7-6-csx1-x-2-1-2:1.11781|0.980:0.53351|0.906:0.16162|0.600:0.09143,(((325980970|unknown|Nitrosomonas\_AL2\_\_1:1.73273,(407462288|unknown|Nitrosopumilus\_kor\_\_1:1.50397,(21229351|unknown|Methanosarcina\_maz\_\_1:0.67446,147921327|unknown|Methanocella\_arv\_\_1:0.99537|0.976:0.45554|0.831:0.19198|0.904:0.19310,(((150398872|CAS-III-B|Methanococcus\_van\_\_10-cmr3g5-cmr4g7-cmr5SS-cmr6g7-x-x-6-1-2:0.84562,(((332668016|unknown|Halismacobacter\_hyd\_\_RT-1-PDEDxK-2:1.20570,(327314603|CAS-III|Prevotella\_den\_\_10-cmr6g7-5g10-csm3g7-x-csm3g7-csx1-csx1-1-Prim-2:0.73847,(379728404|unknown|Saprosira\_pra\_\_2-x-1:0.87455,392395717|unknown|Flexibacter\_lit\_\_2-x-1:0.68194|0.836:0.12742|0.831:0.12483|0.909:0.21557,284040851|CAS-I-B|Spirosoma\_lin\_\_8-7-5-3-6-1-2-4:0.73413|0.213:0.10519,218961577|CAS-I-B|Cloacamonas\_aci\_\_4-2-1-3HD-5-7-8-6:0.58565|0.358:0.09219,257125862|CAS-III|Leptotrichia\_buc\_\_csm3g7-6-x-x-x-x-x-4-2-1-x-x-csx1-csx20:0.61093|0.324:0.10225,(21226661|CAS-I-B|Methanosarcina\_maz\_\_4-2-1-6-3-5-7-8-csa3:0.33047,150401497|CAS-III-A|Methanococcus\_ao\_\_6-3-5-7-8-1-2-4-x-csx1-csm5g7-csm4g5-csm3g7-csm2SS-10:0.92232|0.484:0.09616|0.933:0.21764|1.000:0.55180,(((11499462|CAS-I-A|Archaeoglobus\_ful\_\_cmr1g7-csa3-csa5SS-7-5-csa8a2-3-3HD-2-4-1-4:0.41184,383319612|CAS-I-A|Methanocella\_con\_\_4-1-4-2-csa3-x-x-x-x-x-7:0.53988|0.920:0.13193,(288560430|CAS-III-A|Methanobrevibacter\_rum\_\_1-x-2-6-csx1-csm5g7-csm4g5-csm3g7-csm2SS-10:0.47372,148642083|unknown|Methanobrevibacter\_smi\_\_1-2:0.88751|0.962:0.26391|0.999:0.31122,((((156937921|CAS-I-A|Ignicoccus\_hos\_\_4-1-2-4-3HD-3-x-5-7-csa5SS-R:0.93227,124027534|CAS-I-A|Hyperthermus\_but\_\_csaXg8-5-7-csa5SS-R-x-x-4-2-4-1-x-x-x-R:0.65197|0.613:0.22777,(305663330|CAS-I-A|Ignisphaera\_agg\_\_R-x-7-5-3-3HD-x-6-4-2-1-4:0.36006,307595807|CAS-I-A|Vulcanisaeta\_dis\_\_3HD-3-x-5-7-x-R-x-4-2-1-4:0.64930|0.000:0.08743|0.820:0.16306,118431380|CAS-I-A|Aeropyrum\_per\_\_6-8a2-3HD-3-5-7-csa5SS-R-4-2-1-4:0.62305|0.991:0.27322,(347523053|CAS-I-A|Pyrolobus\_fum\_\_4-x-x-x-x-2-1-4-R-x-x-3HD-3-8a2-5-7-csa5SS:0.78895,((218884093|CAS-I-A|Desulfurococcus\_kam\_\_6-3HD-3-csaXg8-5-7-csa5SS-R-4-2-1-4-R-x-cmr3g5-10-cmr6g7-cmr1g7-cmr5SS-cmr4g7-csm6:0.52821,389861365|CAS-I-A|Thermogladus\_163\_\_6-x-x-4-1-4-R:0.39368|0.988:0.22330,(302347808|CAS-III-A|Acidilobus\_sac\_\_6-x-4-2-1-4-cmr3g5-10-cmr6g7-csm3g7-cmr5SS-cmr4g7-csm6-x-csm6:0.75489,(385805115|CAS-I-A|Fervidicoccus\_fon\_\_6-R-3HD-3-8a2-5-7-x-x-4-1-2-4-R-R-x-x-csm6-cmr6g7-cmr1g7-cmr5SS:1.07762,(15898286|CAS-I-A|Sulfolobus\_sol\_\_csaXg8-3HD-3-5-7-csa5SS-R-R-x-4-1-4:0.66104,15922975|CAS-I-A|Sulfolobus\_tok\_\_R-4-1-2-4-x-x-csa5SS-7-5-3-3HD-csaXg8:0.46000|0.982:0.27868|0.852:0.19905|0.274:0.09946|0.000:0.06113|0.643:0.12690|0.943:0.18315,((18311772|CAS-I-A|Pyrobaculum\_aer\_\_6-4-2-1-4-csa3-x-8a2-3HD-3-5-7-csa5SS-6:0.90508,18311699|CAS-I-A|Pyrobaculum\_aer\_\_3HD-3-x-x-x-6-csa3-x-4-2-1-4:0.82264|0.635:0.11599,15898245|CAS-I-A|Sulfolobus\_sol\_\_csx1-csa5SS-7-5-csaXg8-3-3HD-2-1-6:1.32874|0.273:0.10934|0.979:0.21717,((34541577|CAS-III-B|Porphyromonas\_gin\_\_2-1+RT-cmr6g7-x-cmr4g7-cmr3g5-10:1.17610,(386750121|CAS-III|Helicobacter\_cet\_\_csm5g7-csx1-x-x-x-x-x-x-2-1:1.23102,328954440|CAS-III-A|Desulfobacca\_ace\_\_1+RT-x-x-csm3g7-x-csm6-csm3g7-x-csm3g7-csm3g7:0.77196|0.683:0.11126|0.716:0.14667,(54296139|CAS-II-B|Legionella\_pne\_\_9-1-2-4:0.74021,(34557933|CAS-II-B|Wolinella\_suc\_\_9-1-2-4:0.46386,118497353|CAS-II-B|Francisella\_nov\_\_9-1-2-4:0.52534|0.502:0.15130|1.000:0.52829|0.629:0.07561,(148656004|CAS-III-U|Roseiflexus\_RS\_\_csm3g7-10-csx1-csx1-csx3-8b-7-5-3-6-1-2-4:0.77295,(386854797|CAS-I-A|Deinococcus\_gob\_\_4-2-1-5-7-8a2-3-6:0.75119,167628642|CAS-I-A|Heliobacterium\_mod\_\_4-4-2-1-x-6-5-7-x-3:0.54240|0.076:0.07286|0.605:0.12022|0.964:0.15886|0.878:0.08588,((126465226|CAS-I-A|Staphylothermus\_mar\_\_csm3g7-csm4g5-csm5g7-10-x-x-1-4-2-4-6-R-csa5SS-7-5-csa8a2-3:0.60120,170290046|CAS-I-A|Korarchaeum\_cry\_\_1-4-2-4-R-csa5SS-7-5-csa8a2-x-3:0.38512|1.000:0.74406,(33059017|CAS-I-A|Methanosaeta\_con\_\_4-4-2-1-3-x-x-x-x-5:0.72091,408403000|CAS-I|Nitrososphaera\_gar\_\_4-1-2-4-x-x-x-3-5-7-x-6:0.85041|0.834:0.11037|0.627:0.05146|0.645:0.08920|0.700:0.09695|0.851:0.07534,(119720226|CAS-III-B|Thermofilum\_pen\_\_cmr3g5-10-cmr6g7-cmr1g7-cmr5SS-cmr4g7-1-2-3-csc1g5-csc2g7-x-10d:1.21220,(156937861|CAS-III|Ignicoccus\_hos\_\_6-x-x-1:0.82794,70607609|CAS-I-D|Sulfolobus\_aci\_\_3-csc1g5-csc2g7-10d-R-6-x-2-4-1-x-x-x-x-x-x-x-csm3g7:0.96376|0.956:0.32568|1.000:0.59773|0.890:0.10459|0.784:0.05200,(((187250661|CAS-II|Elusimicrobium\_min\_\_9-1-2:0.61891,325972002|CAS-II|Spirochaeta\_Bud\_\_2-1-9:0.74940|0.971:0.28775,(((386318631|CAS-II|Staphylococcus\_pse\_\_9-1-2:0.79215,(15675042|CAS-II-A|Streptococcus\_pyo\_\_9-1-2-csn2:0.79682,(352684362|CAS-II-A|Acidaminococcus\_int\_\_9-1-2-csn2:0.51095,(169823756|CAS-II-A|Finegoldia\_mag\_\_csa3-x-x-x-x-9-1-2-csn2-PDEDxK:0.61846,42525844|CAS-II-

A|Treponema\_den\_\_9-1-2-csn2:0.40539)0.759:0.12239)0.928:0.19604)0.863:0.16984)0.000:0.05417,(302336019|CAS-II-A|Olsenella\_uli\_\_csn2-2-1-9:0.70415,(90961086|CAS-II-A|Lactobacillus\_sal\_\_9-x-x-1-2-csn2:0.80559,(310286727|CAS-II-A|Bifidobacterium\_bif\_\_csn2-1-9:0.67816,406600270|CAS-II-A|Leuconostoc\_gel\_\_csn2-2-1-9:0.48323)0.903:0.16893)0.956:0.22166)0.823:0.11869)0.980:0.22310,(((269123825|CAS-II|Streptobacillus\_mon\_\_2-1-9:1.01742,(47458867|CAS-II|Mycoplasma\_mob\_\_1-9:0.80008,(71894593|CAS-II-A|Mycoplasma\_syn\_\_9-1-2-csn2-1:0.77706,193216853|CAS-II|Mycoplasma\_art\_\_1-2:0.64612)0.976:0.30122)0.975:0.30654)0.473:0.11491,(238924076|CAS-II|Eubacterium\_rec\_\_9-1-2:0.79548,116627543|CAS-II|Streptococcus\_the\_\_9-1-2:0.73103)0.704:0.20755)0.000:0.04759,57865886|CAS-III-A|Staphylococcus\_epi\_\_6-csm6-csm5g7-csm4g5-csm3g7-csm2SS-10-2-1:1.23206)0.549:0.13652)0.933:0.18660,((187736488|CAS-II|Akermansia\_muc\_\_2-1-9:1.39758,319957207|CAS-II|Nitratifactor\_sal\_\_9-1-2:0.78599)0.825:0.24500,((189485226|CAS-I-C|uncultured\_Ter\_\_3-5-8c-7-4-1-2-9-1-2:0.72350,34557789|CAS-II|Wolinella\_suc\_\_2-1-9:0.70129)0.951:0.22060,((15602991|CAS-II|Pasteurella\_mul\_\_2-1-9:0.67060,(222109284|CAS-II|Acidovorax\_ebr\_\_2-1-9:0.79135,(310780383|CAS-II|Ilyobacter\_pol\_\_2-1-9:0.66637,220930481|CAS-II|Clostridium\_cel\_\_2-1-9:0.45815)0.495:0.12122)0.235:0.10067)0.527:0.07214,(57238545|CAS-II|Campylobacter\_jej\_\_2-1:0.68707,291276264|CAS-II|Helicobacter\_mus\_\_2-1-9:0.53967)0.991:0.31535)0.696:0.07398)0.467:0.12246,((90425960|CAS-II|Rhodospseudomonas\_pal\_\_2-1-9:0.59972,209542526|CAS-II|Gluconacetobacter\_dia\_\_9-x-1-2:0.34389)0.999:0.30076,((60683388|CAS-II|Bacteroides\_fra\_\_2-1-9:0.67044,154250554|CAS-II|Parvibaculum\_lav\_\_2-1-9:0.59613)0.616:0.18474,(294086112|CAS-II|Puniceispirillum\_mar\_\_9-1-2:0.75736,121608212|CAS-II|Verminephrobacter\_eis\_\_9-1-2:0.66201)0.970:0.28280)0.927:0.14692)0.886:0.15928)0.523:0.07411)0.916:0.17687)0.434:0.13234)0.871:0.16414,(117929157|CAS-II|Acidothermus\_cel\_\_2-1-9:0.43620,(283456134|CAS-II|Bifidobacterium\_den\_\_2-1-9:0.77563,38232679|CAS-II|Corynebacterium\_dip\_\_9-1-2:0.38942)0.984:0.34995)0.999:0.58714)1.000:0.76830,(((50085564|CAS-I-F|Acinetobacter\_ADP\_\_3f-x-8f-5f-7f-6f-1:0.87259,(77166205|CAS-I-F|Nitrosococcus\_oce\_\_3f-1-8f-5f-7f-6f:0.70997,15602176|CAS-I-F|Pasteurella\_mul\_\_8f-5f-7f-6f-x-x-1-3f:0.74246)0.432:0.16689)0.999:0.75717,(38234755|CAS-I-E|Corynebacterium\_dip\_\_5-7-cse2SS-8e-6e-3-1-2:1.23531,((53804737|CAS-I-E|Methylococcus\_cap\_\_2-1-6e-5-7-cse2SS-8e-3:0.57557,209966592|CAS-I-E|Rhodospirillum\_cen\_\_2-1-6e-5-7-cse2SS-8e-3:0.74976)0.998:0.72881,((68535718|CAS-I-E|Corynebacterium\_jei\_\_1-6e-5-7-cse2SS-8e-3:0.84511,86738746|CAS-I-E|Frankia\_CcI\_\_3-8e-cse2SS-7-5-6e-1-2:0.59793)0.909:0.30308,((89885834|CAS-I-E|Rhodoferrax\_fer\_\_1-6e-csf3g5-csf2g7-x-csf1g8-DinG:1.24990,16130662|CAS-I-E|Escherichia\_col\_\_2-1-6e-5-7-cse2SS-8e-3:0.63487)0.991:0.50550,(51891801|CAS-I-E|Symbiobacterium\_the\_\_1-3-8e-cse2SS-7-5-6e:0.60107,21674788|CAS-I-E|Chlorobium\_tep\_\_3-8e-cse2SS-6e-7-5-1-2:1.27314)0.707:0.10574)0.656:0.10724)0.799:0.10534,29834079|CAS-I-E|Streptomyces\_ave\_\_1-6e-5-7-cse2SS-8e-3:0.75713)0.915:0.20711)0.936:0.38681)0.855:0.25733)0.999:0.98797,(124485266|unknown|Methanocorpusculum\_lab\_\_1:0.82627,((154150254|unknown|Methanoregula\_boo\_\_1:0.58226,((126178701|unknown|Methanoculleus\_mar\_\_1:0.07443,397780289|unknown|Methanoculleus\_bou\_\_1:0.16232)0.999:0.36213,307352568|unknown|Methanoplanus\_pet\_\_1:0.81980)0.633:0.12886)0.049:0.09156,219852754|unknown|Methanosphaerula\_pal\_\_1:0.54240)0.915:0.20557)1.000:0.95417)0.185:0.13326)0.547:0.10037,332661941|CAS-III-B|Haliscamenobacter\_hyd\_\_2-1-x-RT-cmr6g7-x-cmr4g7-cmr3g5-10:2.03433)0.792:0.07389)0.993:0.24809,((288947693|CAS-III-U|Allochrochromatium\_vin\_\_csx1-x-csx16-x-2-2-1:0.63642,431929780|CAS-III-B|Thioflavicoccus\_mob\_\_cmr4g7-cmr3g5-10-cmr1g7-csx1-x-x-x-2-2-1-RT:0.71938)0.990:0.42353,((292492856|CAS-III|Nitrosococcus\_hal\_\_csm4g5-csm5g7-x-csx1-x-x-csx1-csx1-x-2-1-x-2:0.61028,((206890539|CAS-III-A|Thermodesulfobivrio\_yel\_\_csm2SS-csm3g7-csm4g5-csm5g7-6-x-x-x-x-2-1-1-2:0.94103,(52425690|CAS-III-U|Mannheimia\_suc\_\_2-1-2-x-csx1-csx1-csx16-x-6:0.83608,30248142|CAS-III|Nitrosomonas\_eur\_\_2-1-2-csx1-x-csx1-csx16-6-x-csm5g7-csm4g5-csm3g7:0.51689)0.754:0.15286)0.875:0.16834,430760780|CAS-III-B|Thioalkalivivrio\_nit\_\_cmr4g7-cmr5SS-cmr6g7-csx1-x-csx1-x-x-6-2-1-1-2:0.57693)0.171:0.10187)0.479:0.12125,121997419|CAS-III-B|Halorhodospira\_hal\_\_1-2-1-2-csx1-csx16-csx1-cmr1g7-10-cmr3g5-cmr4g7-cmr5SS-cmr6g7:0.80291)0.973:0.28121)0.994:0.39809)0.748:0.06442)0.802:0.09835,((88602029|CAS-III-A|Methanospirillum\_hun\_\_csx1-x-x-x-x-csx1-csx1-x-x-2-1-x-x-x-csm3g7-csm3g7-x-x-csm3g7-csm3g7-10:1.27757,83592490|CAS-III-A|Rhodospirillum\_rub\_\_csm3g7-csm3g7-csm3g7-10-6-2-1:0.90172)0.839:0.25935,((294676823|CAS-III-A|Rhodobacter\_cap\_\_RT-x-x-x-x-x-10-csm3g7-csm3g7-2-1+RT-RT-6:0.58881,(374998939|CAS-III-B|Azospirillum\_lip\_\_2-1+RT-x-csm3g7-x-x-x-cmr1g7-10-cmr3g5-cmr4g7-cmr5SS:0.39128,(389875622|CAS-III-A|Tistrella\_mob\_\_10-cmr4g7-csm3g7-csm3g7-6-x-1+RT-2:0.63303,(302343124|CAS-III-A|Desulfarculus\_baa\_\_csm3g7-csm3g7-csm3g7-10-1+RT-2-6:0.64546,288957883|CAS-III-A|Azospirillum\_B51\_\_csm3g7-csm3g7-csm3g7-6-2-1+RT:0.24663)0.814:0.09915)0.807:0.11976)0.877:0.14374)1.000:0.61254,20094748|CAS-III-A|Methanopyrus\_kan\_\_2-x-1-x-10-csm2SS-csm3g7-csm4g5-csx1-csm5g7:1.51613)0.666:0.10913)0.922:0.15239)0.946:0.10901)0.045:0.02893)0.725:0.07257)0.132:0.03771)0.879:0.12499);

## Cas2 Tree:

((((((((269123824\_Streptobacillus\_mon\_\_CAS-II\_2-1-9:0.65435000,(90425959\_Rhodospseudomonas\_pal\_\_CAS-II\_2-1-9:0.22101000,209542527\_Gluconacetobacter\_dia\_\_CAS-II\_9-x-1-2:0.17402000)0.94:0.30411000)0.77:0.09933000,(((222109283\_Acidovorax\_ebr\_\_CAS-II\_2-1-9:0.42855000,310780382\_Ilyobacter\_pol\_\_CAS-II\_2-1-9:0.13912000)0.66:0.12085000,15602990\_Pasteurella\_mul\_\_CAS-II\_2-1-9:0.37916000)0.90:0.20861000,((291276263\_Helicobacter\_mus\_\_CAS-II\_2-1-9:0.31167000,57238544\_Campylobacter\_jej\_\_CAS-II\_2-1:0.28830000)0.97:0.34796000,189485227\_uncultured\_Ter\_\_CAS-I-C\_3-5-8c-7-4-1-2-9-1-2:0.13815000)0.81:0.07699000)0.63:0.13694000)0.85:0.07727000,(15675043\_Streptococcus\_pyo\_\_CAS-II-A\_9-1-2-

csn2:0.46351000,(374307736\_Filifactor\_alo\_\_\_CAS-II-A\_csn2-2-1-9:0.28271000,302336018\_Olsenella\_uli\_\_\_CAS-II-A\_csn2-2-1-9:0.43920000)0.76:0.09571000,(42525845\_Treponema\_den\_\_\_CAS-II-A\_9-1-2-csn2:0.39033000,169823757\_Finegoldia\_mag\_\_\_CAS-II-A\_csa3-x-x-x-9-1-2-csn2-  
PDEDxK:0.34299000)0.77:0.11939000)0.84:0.10746000)0.96:0.38688000)0.79:0.08033000,220930480\_Clostridium\_cel\_\_\_CAS-II\_2-1-9:0.29802000)0.88:0.09183000,(319957208\_Nitratifactor\_sal\_\_\_CAS-II\_9-1-2:0.70234000,187736487\_Akkermansia\_muc\_\_\_CAS-II\_2-1-9:0.70126000)0.52:0.04877000,(34557788\_Wolinella\_suc\_\_\_CAS-II\_2-1-9:0.64671000,(116627544\_Streptococcus\_the\_\_\_CAS-II\_9-1-2:0.56326000,238924077\_Eubacterium\_rec\_\_\_CAS-II\_9-1-2:0.13222000)0.94:0.21511000,(90961087\_Lactobacillus\_sal\_\_\_CAS-II-A\_9-x-x-1-2-csn2:0.11325000,(406600269\_Leuconostoc\_gel\_\_\_CAS-II-A\_csn2-2-1-9:0.31623000,331702226\_Lactobacillus\_buc\_\_\_CAS-II\_2-1-9:0.07283000)0.66:0.08097000)0.97:0.21453000)0.73:0.09770000)0.09:0.07068000)0.16:0.13698000)0.85:0.12415000,(60683387\_Bacteroides\_s\_fra\_\_\_CAS-II\_2-1-9:0.32820000,154250553\_Parvibaculum\_lav\_\_\_CAS-II\_2-1-9:0.27515000)0.72:0.07487000)0.81:0.13684000,(294086113\_Puniceispirillum\_mar\_\_\_CAS-II\_9-1-2:0.53000000,(189440766\_Bifidobacterium\_lon\_\_\_CAS-II\_9-1-2:0.31549000,(117929156\_Acidothermus\_cel\_\_\_CAS-II\_2-1-9:1.13966000,38232680\_Corynebacterium\_dip\_\_\_CAS-II\_9-1-2:0.36119000)0.34:0.23863000)0.96:0.35689000)0.60:0.03762000,(121608213\_Verminephrobacter\_eis\_\_\_CAS-II\_9-1-2:0.53910000,(57865885\_Staphylococcus\_epi\_\_\_CAS-III-A\_6-csm6-csm5g7-csm4g5-csm3g7-csm2SS-10-2-1:1.29537000,(325972001\_Spirochaeta\_Bud\_\_\_CAS-II\_2-1-9:0.39221000,187250662\_Elusimicrobium\_min\_\_\_CAS-II\_9-1-2:0.87228000)0.61:0.25072000)0.68:0.09900000)0.79:0.12183000)0.88:0.15899000)0.82:0.22250000,(193216854\_Mycoplasma\_art\_\_\_CAS-II\_1-2:0.60540000,71894594\_Mycoplasma\_syn\_\_\_CAS-II-A\_9-1-2-csn2-1:0.22111000)0.93:0.55087000)0.97:0.66890000,(148642084\_Methanobrevibacter\_smi\_\_\_unknown\_1-2:1.27532000,(((283778925\_Pirellula\_sta\_\_\_CAS-III-A\_1+RT-2-x-10-csm3g7-csm3g7:0.89402000,319790502\_Thermovibrio\_amm\_\_\_unknown\_2-2-2-1:0.93403000)0.80:0.21342000,(118497968\_Francisella\_nov\_\_\_unknown\_2OG-x-x-x-csa3-2-1-4:1.02155000,(337288663\_Thermodesulfobacterium\_OPB\_\_\_CAS-III-A\_10-csm2SS-csm3g7-csm4g5-csm5g7-6-csx1-x-2-1-2:1.15971000,337288661\_Thermodesulfobacterium\_OPB\_\_\_CAS-III-A\_10-csm2SS-csm3g7-csm4g5-csm5g7-6-csx1-x-2-1-2:0.79480000)0.77:0.26073000,(319790501\_Thermovibrio\_amm\_\_\_unknown\_2-2-2-1:0.48746000,319790503\_Thermovibrio\_amm\_\_\_unknown\_2-2-2-1:0.90092000)0.74:0.15026000)0.72:0.06215000)0.82:0.16445000,(15609953\_Mycobacterium\_tub\_\_\_CAS-III-A\_2-1-csm6-csm5g7-csm4g5-csm3g7-csm2SS-10-6:0.51178000,(296133513\_Thermicola\_pot\_\_\_CAS-III-A\_2-1-csm6-6-csm5g7-csm4g5-csm3g7-csm2SS-10:0.29366000,114567263\_Syntrophomonas\_wol\_\_\_CAS-III-A\_csm6-x-2-1-x-6-csm5g7-csm4g5-csm3g7-csm2SS-10:0.23322000)0.89:0.35153000,348026600\_Megasphaera\_els\_\_\_CAS-III-A\_1-2-10-csm2SS-csm3g7-csm4g5-csm5g7-6-csm6:0.67555000)0.78:0.13760000)0.90:0.31648000,116627765\_Streptococcus\_the\_\_\_CAS-III-A\_1-2-6-csm2SS-csm3g7-csm4g5-csm5g7-x-csm6:0.60642000)0.88:0.30205000)0.75:0.03587000)0.86:0.11603000,(((269798875\_Veillonella\_par\_\_\_CAS-III-A\_6-csm3g7-csx19-csm3g7-5g10-csm3g7-10-csx20-1-2-x-csx1-csx1:0.77156000,88602028\_Methanospirillum\_hun\_\_\_CAS-III-A\_csx1-x-x-x-csx1-csx1-x-x-2-1-x-x-x-csm3g7-csm3g7-x-x-csm3g7-csm3g7:0.85308000)0.87:0.52835000,20094746\_Methanopyrus\_kan\_\_\_CAS-III-A\_2-x-1-x-10-csm2SS-csm3g7-csm4g5-csx1-csm5g7:1.62011000)0.51:0.19062000,(((37677205\_Vibrio\_vul\_\_\_CAS-III\_6-csm3g7-x-csm3g7-5g10-cmr4g7-10-x-x-1+RT-2-2-csx1-csx16-csx16-csm6:0.72100000,83592489\_Rhodospirillum\_rub\_\_\_CAS-III-A\_csm3g7-csm3g7-csm3g7-10-6-2-1:0.71732000)0.78:0.22771000,436839746\_Desulfovibrio\_hyd\_\_\_CAS-III-B\_1+RT-2-x-x-cmr6g7-cmr5SS-cmr4g7-cmr3g5-10-cmr1g7:0.74051000)0.17:0.14583000,317051220\_Desulfurispirillum\_ind\_\_\_CAS-III-A\_csm2SS-csm3g7-csm4g5-csm5g7-x-x-csx1-csx20-x-1-2-x-2:1.75303000)0.05677000,(((386750120\_Helicobacter\_cet\_\_\_CAS-III\_csm5g7-csx1-x-x-x-x-x-x-2-1:1.01565000,(((116748795\_Syntrophobacter\_fum\_\_\_CAS-III-A\_csm4g5-csm3g7-csm2SS-10-6-csx20-csx1-x-Prim2-1-2:0.31037000,218961168\_Cloacamonas\_aci\_\_\_unknown\_csa3-csx1+x-x-x-x-x-Prim2-x-1-2:0.54685000)0.85:0.15969000,(328953423\_Desulfobacca\_ace\_\_\_CAS-III\_csm6-x-csx20-csx1-x-x-x-Prim2+x-x-1-2:0.41723000,(313673557\_Calditerrivibrio\_nit\_\_\_unknown\_2-Prim2-1:0.25389000,332296541\_Thermodesulfobium\_nar\_\_\_CAS-III-A\_4-x-2-1-Prim2-csm5g7-csm4g5-csm3g7-csm2SS-10-csx1-csx1-6:0.43566000)0.40:0.12454000)0.15:0.04882000)0.92:0.18403000,(383762166\_Caldilinea\_aer\_\_\_CAS-III-A\_2-1-6-csx15-x-csx1-csm5g7-csm4g5-csm3g7-csm2SS-10:0.51565000,(156741962\_Roseiflexus\_cas\_\_\_CAS-III-A\_10-csm2SS-csm3g7-csm4g5-csm5g7-csx1-6-1-2:0.24695000,320161860\_Anaerolinea\_the\_\_\_CAS-III-A\_10-csm2SS-csm3g7-csm4g5-csm5g7-csx1-csx15-6-1-2:0.53996000)0.80:0.22964000,328953001\_Desulfobacca\_ace\_\_\_CAS-III\_6-x-x-x-x-x-RT-x-x-1-2:0.37791000)0.38:0.04439000)0.63:0.03747000)0.84:0.09147000,(159898756\_Herpetosiphon\_aur\_\_\_CAS-I-D\_10d-csc2g7-csc1g5-3-6-4-1-2:0.79678000,(((134299483\_Desulfotomaculum\_red\_\_\_CAS-III-A\_1+4-2-10-csm2SS-csm3g7-csm4g5-csx1-6:0.63110000,119357847\_Chlorobium pha\_\_\_CAS-III-A\_csx1-csm5g7-csm4g5-csm3g7-csm2SS-10-x-csx15-csx1-1+RT-2-x-x-x-2-1-6:0.38435000)0.57:0.12431000,(76802277\_Natronomonas pha\_\_\_CAS-I-D\_R-6-10d-csc2g7-csc1g5-3-4-1-2:1.07211000,302391603\_Acetohalobium\_ara\_\_\_CAS-I-D\_10d-csc2g7-csc1g5-3-4-1-2-6:0.31311000)0.70:0.11597000)0.69:0.09059000,75910375\_Anabaena\_var\_\_\_CAS-I-D\_10d-csc2g7-csc1g5-2OG-6-4-1-2:0.30845000)0.71:0.06011000)0.92:0.23922000)0.82:0.08356000)0.60:0.01366000,(337286707\_Thermodesulfatator\_ind\_\_\_CAS-III-B\_csx1-cmr6g7-cmr5SS-cmr4g7-x-x-cmr3g5-10-cmr1g7-x-2-x-1-2-6:0.54544000,(119357852\_Chlorobium pha\_\_\_CAS-III-A\_csx1-csm5g7-csm4g5-csm3g7-csm2SS-10-x-csx15-csx1-1+RT-2-x-x-x-2-1-6:0.29854000,(((317051218\_Desulfurispirillum\_ind\_\_\_CAS-III-A\_csm2SS-csm3g7-csm4g5-csm5g7-x-x-csx1-csx20-x-1-2-x-2:0.47733000,85858453\_Syntrophus\_aci\_\_\_CAS-III\_cmr6g7-csm6-csx1-x-x-x-x-1-2-2:0.66471000)0.86:0.26707000,85858454\_Syntrophus\_aci\_\_\_CAS-III\_cmr6g7-csm6-csx1-x-x-x-x-x-1-2-2:0.90326000)0.42:0.18606000,(328949008\_Treponema\_suc\_\_\_CAS-III-A\_csx1-x-x-2-2-1-x-x-csx20-csx1-x-csm5g7-csm4g5-

csx1:0.75344000)0.10:0.23727000)0.72:0.19590000,(34541576\_Porphyrromonas\_gin\_\_CAS-III-B\_2-1+RT-cmr6g7-x-cmr4g7-cmr3g5-10:0.69930000,336116790\_Microlunatus\_pho\_\_CAS-III-A\_10-csm3g7-cmr3g5-csm3g7-x-x-x-6-1+RT-2-x-10-csm3g7-cmr3g5-csm3g7:0.98282000)0.85:0.43712000,268318377\_Rhodothermus\_mar\_\_CAS-III-U\_csx1-csx20-x-x-csx1-csx1-6-x-2-1+4:0.44664000)0.92:0.50562000)0.36:0.17225000,((((30248141\_Nitrosomonas\_eur\_\_CAS-III-A\_2-1-2-csx1-x-csx1-csx16-6-x-csm5g7-csm4g5-csm3g7-csm2SS:0.44781000,52425689\_Mannheimia\_suc\_\_CAS-III-U\_2-1-2-x-csx1-csx1-csx16-x-6:0.59489000)0.90:0.32569000,430760782\_Thioalkalivibrio\_nit\_\_CAS-III-B\_cmr3g5-cmr4g7-cmr5SS-cmr6g7-csx1-x-csx1-x-x-6-2-1-1-2:0.51091000)0.80:0.19099000,(431929779\_Thioflavicoccus\_mob\_\_CAS-III-B\_cmr6g7-cmr5SS-cmr4g7-cmr3g5-10-cmr1g7-csx1-x-x-x-2-2-1-RT:0.47668000,288947692\_Allochromatium\_vin\_\_CAS-III-U\_cmr6g7-x-x-x-x-csx1-x-csx16-x-2-2-1:0.83407000)0.89:0.32391000)0.83:0.20682000,292492858\_Nitrosococcus\_hal\_\_CAS-III-A\_csm3g7-csm4g5-csm5g7-x-csx1-x-x-csx1-csx1-x-2-1-x-2:0.56529000)0.85:0.21514000,(206890293\_Thermodesulfobivrio\_yel\_\_CAS-III-A\_10-csm2SS-csm3g7-csm4g5-csm5g7-6-x-x-x-x-2-1-1-2:0.54995000,121997420\_Halorhodospira\_hal\_\_CAS-III-B\_1-2-1-2-csx1-csx16-csx1-cmr1g7-10-cmr3g5-cmr4g7-cmr5SS-cmr6g7-6:0.80448000)0.82:0.18626000)0.92:0.35773000,(268318440\_Rhodothermus\_mar\_\_CAS-I-C\_2-1+4:0.65320000,(320102062\_Isosphaera\_pal\_\_CAS-I-C\_1+4-2-csb2:0.62829000,(134101618\_Saccharopolyspora\_ery\_\_CAS-III-A\_1+4-2-x-x-x-csm3g7-cmr3g5-csm3g7-10:0.50543000,(83591518\_Rhodospirillum\_rub\_\_CAS-I-E\_2-1-6e-5-7-cse2SS-8e-3-x-x-2-1+4-csb2-x-x-csm3g7-csm3g7-csm3g7-10:0.49671000,39995169\_Geobacter\_sul\_\_CAS-I-Cu\_3-8-csb1-csb2-x-x-1+4-2:0.23073000)0.92:0.28853000,312114616\_Rhodomicrobium\_van\_\_CAS-III-A\_RT-2-1-csm3g7-csx19-csm3g7-csm3g7-10-x-csm6-csx1:0.80211000)0.90:0.26751000)0.34:0.06159000)0.41:0.13074000,378719040\_Gordonia\_pol\_\_CAS-I-Cu\_2-1+4-csb2-csb1-8-3:0.70293000)0.27:0.09076000)0.90:0.28490000,(162457463\_Sorangium\_cel\_\_CAS-I-C\_6-3-8c-7-5-1-2:0.58650000,347756304\_Chloracidobacterium\_the\_\_CAS-I-C\_6-3-8c-7-5-1+4-2:0.47759000)0.36:0.08796000,24215881\_Leptospira\_int\_\_CAS-I-C\_1+4-2-x-x-6-3-8c-7-5:0.48595000)0.92:0.30625000)0.86:0.18671000)0.74:0.07975000,337286710\_Thermodesulfator\_ind\_\_CAS-III-B\_csx1-cmr6g7-cmr5SS-cmr4g7-x-x-cmr3g5-10-cmr1g7-x-2-x-1-2-6:0.72111000)0.83:0.20250000)0.69:0.06791000)0.69:0.05198000)0.91:0.17860000)0.78:0.06280000,(((427708212\_Nostoc\_PCC\_\_CAS-III-A\_csm3g7-csx19-csm3g7-x-x-x-6-x-x-x-2-1-x-x-1+RT:0.48505000,(((433631662\_Mycobacterium\_can\_\_CAS-I-C\_2-1-4-7-8c-5-3:0.46431000,86742033\_Frankia\_CcI\_\_CAS-I-C\_3-5-8c-7-4-1-2:0.59968000)0.25:0.10391000,((189485224\_uncultured\_Ter\_\_CAS-I-C\_3-5-8c-7-4-1-2-9-1-2:0.23678000,108759816\_Myxococcus\_xan\_\_CAS-I-C\_2-1-4-7-8c-5-3HD:0.66151000)0.76:0.28677000,156112905\_Bacillus\_hal\_\_CAS-I-C\_cmr5SS-cmr6g7-x-x-x-3-5-8c-7-4-1-2:0.12115000)0.98:0.52307000)0.86:0.20392000,261415949\_Fibrobacter\_suc\_\_CAS-III-A\_1-2-x-x-csx1-10-csm3g7-x-csm3g7-csx20:0.98191000)0.83:0.13763000)0.78:0.05780000,(297622674\_Truepera\_rad\_\_CAS-III-U\_2-1-csx1-csx1-6:0.43915000,344996858\_Caldicellulosiruptor\_lac\_\_CAS-I-D\_2-1-4-6-3-csc1g5-csc2g7-10d:0.72375000)0.71:0.35642000,(17227878\_Nostoc\_PCC\_\_CAS-III-B\_csx18-1-2:0.64378000,326793968\_Marinomonas\_med\_\_CAS-III-B\_2-6-x-x-cmr6g7-cmr5SS-cmr4g7-cmr3g5-10-cmr1g7:0.64153000)0.70:0.19291000)0.62:0.01818000)0.85:0.06567000,((38505761\_Synechocystis\_PCC\_\_CAS-III-B\_cmr6g7-cmr5SS-cmr4g7-x-cmr3g5-10-csx18-1-2:0.33189000,((389875623\_Tistrella\_mob\_\_CAS-III-A\_10-cmr4g7-csm3g7-csm3g7-6-x-1+RT-2:0.59765000,((302343125\_Desulfarculus\_baa\_\_CAS-III-A\_csm3g7-csm3g7-csm3g7-10-1+RT-2-6:0.43962000,294676822\_Rhodobacter\_cap\_\_CAS-III-A\_RT-x-x-x-x-10-csm3g7-csm3g7-2-1+RT-RT-6:0.18051000)0.66:0.10955000,288957882\_Azospirillum\_B51\_\_CAS-III-A\_csm3g7-csm3g7-csm3g7-6-2-1+RT:0.07997000)0.13:0.11882000)0.87:0.18367000,374998938\_Azospirillum\_lip\_\_CAS-III-B\_2-1+RT-x-csm3g7-x-x-x-cmr1g7-10-cmr3g5-cmr4g7:0.10149000)0.95:0.45546000,220934971\_Thioalkalivibrio\_sul\_\_CAS-III-B\_10-cmr3g5-cmr4g7-cmr5SS-cmr6g7-csx1-x-csx1-x-1-2-x-csx1:0.86008000)0.88:0.31193000)0.84:0.21401000,((148657119\_Roseiflexus\_RS\_\_CAS-III-U\_2-x-1-RT-x-x-x-x-csx15-csx1:0.64747000,159898908\_Herpetosiphon\_aur\_\_unknown\_RT-1-2:0.45464000)0.67:0.06560000,((38505685\_Synechocystis\_PCC\_\_CAS-I-D\_3-10d-csc2g7-csc1g5-6-4-1-2:0.70582000,46255266\_Thermus\_the\_\_CAS-I-A\_2-1-4-x-8a-7-5-6:0.80808000)0.34:0.16455000,218442810\_Cyanotheca\_PCC\_\_CAS-III-A\_csm6-x-x-RT-1-2:0.60968000)0.55:0.12524000)0.88:0.21577000)0.69:0.03635000)0.73:0.03037000,37677206\_Vibrio\_vul\_\_CAS-III\_6-csm3g7-x-csm3g7-5g10-cmr4g7-10-x-x-1+RT-2-2-csx1-csx16-csx16-csm6:0.81769000)0.32:0.05358000)0.72:0.05232000)0.82:0.11565000)0.15:0.12021000,(((30248143\_Nitrosomonas\_eur\_\_CAS-III-A\_2-1-2-csx1-x-csx1-csx16-6-x-csm5g7-csm4g5-csm3g7-csm2SS:0.47226000,206889468\_Thermodesulfobivrio\_yel\_\_CAS-III-A\_10-csm2SS-csm3g7-csm4g5-csm5g7-6-x-x-x-x-2-1-1-2:0.63151000)0.20:0.09160000,((430760779\_Thioalkalivibrio\_nit\_\_CAS-III-B\_cmr3g5-cmr4g7-cmr5SS-cmr6g7-csx1-x-csx1-x-x-6-2-1-1-2:0.42728000,121997422\_Halorhodospira\_hal\_\_CAS-III-B\_1-2-1-2-csx1-csx16-csx1-cmr1g7-10-cmr3g5-cmr4g7-cmr5SS-cmr6g7-6:0.48149000)0.23:0.15776000,292492855\_Nitrosococcus\_hal\_\_CAS-III-A\_csm3g7-csm4g5-csm5g7-x-csx1-x-x-csx1-csx1-x-2-1-x-2:0.23880000)0.94:0.26331000)0.81:0.16973000,52425691\_Mannheimia\_suc\_\_CAS-III-U\_2-1-2-x-csx1-csx1-csx16-x-6:1.01735000)0.74:0.20008000,(288947691\_Allochromatium\_vin\_\_CAS-III-U\_cmr6g7-x-x-x-x-csx1-x-csx16-x-2-2-1:0.79768000,431929778\_Thioflavicoccus\_mob\_\_CAS-III-B\_cmr6g7-cmr5SS-cmr4g7-cmr3g5-10-cmr1g7-csx1-x-x-x-2-2-1-RT:0.34180000)0.97:0.82237000)0.89:0.58176000)0.50:0.14925000,328949007\_Treponema\_suc\_\_CAS-III-A\_csx1-x-x-2-2-1-x-x-x-csx20-csx1-x-csm5g7-csm4g5-csm3g7:0.94210000)0.64:0.06485000)0.83:0.09917000,(((385809791\_Ignavibacterium\_alb\_\_CAS-III-U\_csx1-csx20-csx1-csx1-x-x-x-1-2:0.40745000,150021525\_Thermosiphon\_mel\_\_CAS-III-B\_2-1-2-x-x-x-csm6-cmr1g7-10-cmr3g5-cmr4g7-cmr5SS-cmr6g7:0.72705000)0.35:0.23605000,268317184\_Rhodothermus\_mar\_\_CAS-III-A\_2-1-x-csx1-csm5g7-csm4g5-csm3g7-csm2SS-10-4-3:0.47741000)0.76:0.10019000,(((289596693\_Aciduliprofundum\_boo\_\_CAS-III-A\_2-1-4-6-csx1-csx1-csm5g7-csm4g5-csm3g7-csm2SS-10:0.27366000,33359262\_Pyrococcus\_hor\_\_CAS-I-B\_csm2SS-csm3g7-csm4g5-csm5g7-csm6-8b-7-5-x-1-2-4-3-



csx1:0.59521000)0.88:0.14079000,(33359542\_Pyrococcus\_fur\_\_\_CAS-I-B\_2-1-4-3-5-7-8b-cmr6g7-cmr5SS-cmr4g7-csm6:0.30594000,((41614812\_Nanoarchaeum\_equ\_\_\_CAS-I-B\_2-1-x-7-5-3-4:0.61326000,(48477074\_Picrophilus\_tor\_\_\_CAS-I-D\_2-1-4-3-csc1g5-csc2g7-10d-6:0.64411000,154174506\_Campylobacter\_cur\_\_\_CAS-I-B\_1-2-4-3-5-7-8-6:0.68988000)0.77:0.19975000)0.87:0.23894000,13540936\_Thermoplasma\_vol\_\_\_CAS-III-A\_2-1-csx1-csm5g7-csm4g5-csm3g7-csm2SS-10-6-csm6:0.34232000)0.84:0.15228000,(84489237\_Methanosphaera\_sta\_\_\_CAS-I-B\_6-8-7-5-3-4-1-2:0.35892000,150021527\_Thermosiphon\_mel\_\_\_CAS-III-B\_2-1-2-x-x-csm6-cmr1g7-10-cmr3g5-cmr4g7-cmr5SS-cmr6g7:0.44479000)0.80:0.08895000)0.93:0.15361000)0.11:0.00015000)0.85:0.11140000,(111224948\_Frankia\_ain\_\_\_CAS-I-B\_6-x-7-3+5-4-1-2:0.86083000,55376279\_Haloarcula\_mar\_\_\_CAS-I-B\_6-8-7-5-3-4-1-2:0.50539000)0.83:0.21709000)0.72:0.03878000,389844442\_Mesotoga\_pri\_\_\_CAS-I-B\_csm6-csm6+x-x-cmr6g7-cmr5SS-cmr4g7-cmr3g5-10-cmr1g7-csm6-2-x-x-1-4-3-5-7:0.45847000)0.82:0.17195000)0.68:0.19571000,390962115\_Thermococcus\_CL1\_\_\_CAS-III-A\_csx1-x-6-10-csm2SS-csm3g7-csm4g5-csm5g7-R2-csx3-2-1:0.80322000)0.79:0.16255000,292492939\_Nitrosococcus\_hal\_\_\_CAS-I-D\_6-10d-csc2g7-x-3-4-1-2:1.14074000)0.86:0.32832000)0.90:0.17979000,(((408403001\_Nitrososphaera\_gar\_\_\_CAS-I\_4-1-2-4-x-x-x-3-5-7-x-6:0.58554000,(18311771\_Pyrobaculum\_aer\_\_\_CAS-I-A\_6-4-2-1-4-csa3-x-8a2-3HD-3-5-7-csa5SS:1.14033000,(126465228\_Staphylothermus\_mar\_\_\_CAS-I-A\_csm3g7-csm4g5-csm5g7-10-x-x-1-4-2-4-6-R-csa5SS-7-5-csa8a2-3:0.26154000,170290048\_Korarchaeum\_cry\_\_\_CAS-I-A\_1-4-2-4-R-csa5SS-7-5-csa8a2-x-3-3HD:0.40242000)0.86:0.17885000,(330509016\_Methanosaeta\_con\_\_\_CAS-I-A\_4-4-2-1-3-x-x-x-x-5:0.80370000,((148656005\_Roseiflexus\_RS\_\_\_CAS-III-U\_10-csx1-csx1-csx3-8b-7-5-3-6-1-2-4:1.02105000,386854796\_Deinococcus\_gob\_\_\_CAS-I-A\_4-2-1-5-7-8a2-3-6:1.37160000)0.38:0.04011000,167628643\_Heliobacterium\_mod\_\_\_CAS-I-A\_4-4-2-1-x-6-5-7-x-3:0.15876000)0.88:0.14551000)0.87:0.17843000)0.61:0.10408000)0.32:0.17182000)0.69:0.16217000,(((392395715\_Flexibacter\_lit\_\_\_unknown\_2-x-1:0.44069000,379728402\_Saprosira\_gra\_\_\_unknown\_2-x-1:0.77932000)0.43:0.26216000,327314605\_Prevotella\_den\_\_\_CAS-III\_10-cmr6g7-5g10-csm3g7-x-csm3g7-csx1-csx1-1-Prim-2:0.60272000)0.91:0.33715000,15898244\_Sulfolobus\_sol\_\_\_CAS-I-A\_csx1-csa5SS-7-5-csaXg8-3-3HD-2-1-6:0.58386000)0.60:0.05277000,332668018\_Haliscomenobacter\_hyd\_\_\_unknown\_RT-1-PDEDxK-2:0.97255000)0.80:0.16408000)0.66:0.05231000,(((284040852\_Spirosoma\_lin\_\_\_CAS-I-B\_8-7-5-3-6-1-2-4:0.51641000,218961576\_Cloacamonas\_aci\_\_\_CAS-I-B\_4-2-1-3HD-5-7-8-6:0.33190000)0.91:0.29536000,21226660\_Methanosarcina\_maz\_\_\_CAS-I-B\_4-2-1-6-3-5-7-8-csa3:0.27037000)0.00:0.11790000,150401498\_Methanococcus\_aeo\_\_\_CAS-III-A\_6-3-5-7-8-1-2-4-x-csx1-csm5g7-csm4g5-csm3g7-csm2SS-10:0.70927000)0.64:0.07037000,257125861\_Leptotrichia\_buc\_\_\_CAS-III\_csm3g7-6-x-x-x-x-x-4-2-1-x-x-csx1-csx20:0.64294000)0.94:0.33287000,(((34557934\_Wolinella\_suc\_\_\_CAS-II-B\_9-1-2-4:0.68476000,54296140\_Legionella\_pne\_\_\_CAS-II-B\_9-1-2-4:0.49844000)0.85:0.41634000,118497354\_Francisella\_nov\_\_\_CAS-II-B\_9-1-2-4:0.44155000)0.97:0.63521000,332661940\_Haliscomenobacter\_hyd\_\_\_CAS-III-B\_2-1-x-RT-cmr6g7-x-cmr4g7-cmr3g5-10:0.87623000)0.60:0.22102000,150398873\_Methanococcus\_van\_\_\_CAS-III-B\_10-cmr3g5-cmr4g7-cmr5SS-cmr6g7-x-x-6-1-2:0.74887000)0.46:0.29206000)0.64:0.14281000)0.68:0.06174000)0.81:0.17631000,(((385805116\_Fervidicoccus\_fon\_\_\_CAS-I-A\_R-3HD-3-8a2-5-7-x-x-4-1-2-4-R-R-x-x-csm6-cmr6g7-cmr1g7-cmr5SS-cmr4g7:0.87975000,(((119720227\_Thermofilum\_pen\_\_\_CAS-III-B\_cmr3g5-10-cmr6g7-cmr1g7-cmr5SS-cmr4g7-1-2-3-csc1g5-csc2g7-x-10d:0.29880000,70607607\_Sulfolobus\_aci\_\_\_CAS-I-D\_3-csc1g5-csc2g7-10d-R-6-x-2-4-1:0.72201000)0.98:0.47456000,(347523052\_Pyrolobus\_fum\_\_\_CAS-I-A\_4-x-x-x-x-2-1-4-R-x-x-3HD-3-8a2-5-7:0.53973000,((305663329\_Ignisphaera\_agg\_\_\_CAS-I-A\_R-x-7-5-3-3HD-x-6-4-2-1-4:0.18600000,307595806\_Vulcanisaeta\_dis\_\_\_CAS-I-A\_6-3HD-3-x-5-7-x-R-x-4-2-1-4:0.43362000)0.50:0.11061000,(118431379\_Aeropyrum\_per\_\_\_CAS-I-A\_6-8a2-3HD-3-5-7-csa5SS-R-4-2-1-4:0.27746000,156937922\_Ignicoccus\_hos\_\_\_CAS-I-A\_4-1-2-4-3HD-3-x-5-7-csa5SS-R:0.70425000)0.69:0.22932000)0.44:0.18671000)0.91:0.29882000)0.58:0.04873000,124027532\_Hyperthermus\_but\_\_\_CAS-I-A\_3-3-csaXg8-5-7-csa5SS-R-x-x-4-2-4-1-x-x-x-R:0.62624000)0.91:0.28271000,302347807\_Acidilobus\_sac\_\_\_CAS-I-A\_6-x-4-2-1-4-cmr3g5-10-cmr6g7-csm3g7-cmr5SS-cmr4g7-csm6-x-csm6:0.54554000)0.84:0.27918000)0.20:0.13179000,15922976\_Sulfolobus\_tok\_\_\_CAS-I-A\_R-4-1-2-4-x-x-csa5SS-7-5-3-3HD-csaXg8:0.41222000)0.25:0.18822000,218884092\_Desulfurococcus\_kam\_\_\_CAS-I-A\_6-3HD-3-csaXg8-5-7-csa5SS-R-4-2-1-4-R-x-cmr3g5-10-cmr6g7-cmr1g7-cmr5SS-cmr4g7:0.81926000)0.92:0.64207000)0.74:0.09009000,(288560432\_Methanobrevibacter\_rum\_\_\_CAS-III-A\_1-x-2-6-csx1-csm5g7-csm4g5-csm3g7-csm2SS-10:0.92672000,(11499460\_Archaeoglobus\_ful\_\_\_CAS-I-A\_cmr1g7-csa3-csa5SS-7-5-csa8a2-3-3HD-2-4-1-4:0.35880000,383319614\_Methanocella\_con\_\_\_CAS-I-A\_4-1-4-2-csa3-x-x-x-x-x-7-x-x-3:0.24133000)0.96:0.43829000)0.62:0.05416000)0.84:0.21065000)0.78:0.21994000,18311698\_Pyrobaculum\_aer\_\_\_CAS-I-A\_3HD-3-x-x-x-6-csa3-x-4-2-1-4:1.11375000)0.67:0.07248000,((50085558\_Acinetobacter\_ADp\_\_\_CAS-I-F\_3f-x-8f-5f-7f-6f-1:0.49611000,(77166204\_Nitrosococcus\_oce\_\_\_CAS-I-F\_3f-1-8f-5f-7f-6f:0.58084000,15602177\_Pasteurella\_mul\_\_\_CAS-I-F\_8f-5f-7f-6f-x-x-1-3f:0.71605000)0.71:0.25381000)1.00:2.48456000,((90111482\_Escherichia\_col\_\_\_CAS-I-E\_2-1-6e-5-7-cse2SS-8e-3:0.19505000,77128445\_Methylococcus\_cap\_\_\_CAS-I-E\_2-1-6e-5-7-cse2SS-8e-3:1.08019000)0.71:0.19962000,21674789\_Chlorobium\_tep\_\_\_CAS-I-E\_3-8e-cse2SS-6e-7-5-1-2:1.33635000)0.81:0.25236000,(209966591\_Rhodospirillum\_cen\_\_\_CAS-I-E\_2-1-6e-5-7-cse2SS-8e-3:1.03342000,(86738747\_Frankia\_Cci\_\_\_CAS-I-E\_3-8e-cse2SS-7-5-6e-1-2:0.29430000,38234756\_Corynebacterium\_dip\_\_\_CAS-I-E\_5-7-cse2SS-8e-6e-3-1-2:1.16325000)0.85:0.31309000)0.72:0.13876000)0.81:1.00213000)0.76:0.43903000);

## Cas4 Tree:

((170290047\_Candidatus\_Kor\_\_CAS-I-A:0.32712000,126465227\_Staphylothermus\_mar\_\_CAS-I-A:0.33457000)0.99:0.59491000,(((408402999\_Candidatus\_Nit\_\_CAS-I-A:0.46381000,(330509014\_Methanosaeta\_con\_\_CAS-I-A:0.57219000,(11499463\_Archaeoglobus\_ful\_\_CAS-I-A:0.37486000,383319613\_Methanocella\_con\_\_CAS-I-A:0.37265000)0.99:0.34884000)0.65:0.14787000)0.92:0.15885000,167628645\_Heliobacterium\_mod\_\_CAS-I-A:0.38142000)0.98:0.30697000,(((385805114\_Fervidicoccus\_fon\_\_CAS-I-A:0.87288000,(218884094\_Desulfurococcus\_kam\_\_CAS-I-A:0.32294000,389861364\_Thermogladus\_cel\_\_CAS-I-A:0.20434000)0.51:0.12318000)0.92:0.21199000,((15898287\_Sulfolobus\_sol\_\_CAS-I-A:0.39623000,15922974\_Sulfolobus\_tok\_\_CAS-I-A:0.37770000)0.96:0.21913000,((18311700\_Pyrobaculum\_aer\_\_CAS-I-A:0.81016000,347523054\_Pyrolobus\_fum\_\_CAS-I-A:0.43936000)0.20:0.06803000,18311773\_Pyrobaculum\_aer\_\_CAS-I-A:0.72574000)0.77:0.12556000)0.60:0.03377000)0.71:0.16243000,(((307595808\_Vulcanisaeta\_dis\_\_CAS-I-A:0.21634000,124027533\_Hyperthermus\_but\_\_CAS-I-A:0.57735000)0.86:0.10869000,(118431381\_Aeropyrum\_per\_\_CAS-I-A:0.41512000,305663331\_Ignisphaera\_agg\_\_CAS-I-A:0.21018000)0.90:0.10812000)0.92:0.19835000,156937920\_Ignicoccus\_hos\_\_CAS-I-A:0.23716000)1.00:0.68066000)0.23:0.03755000)0.78:0.09126000,(((111224946\_Frankia\_aln\_\_CAS-I-B:1.13081000,(((84489235\_Methanospaera\_sta\_\_CAS-I-B:0.56652000,(14590111\_Pyrococcus\_hor\_\_CAS-I-B:0.27203000,55376277\_Haloarcula\_mar\_\_CAS-I-B:0.96864000)0.88:0.20644000)0.80:0.17828000,(389844446\_Mesotoga\_pri\_\_CAS-I-B:0.83994000,41614818\_Nanoarchaeum\_equ\_\_CAS-I-B:0.35613000)0.97:0.39504000)0.09:0.06437000,(289596695\_Aciduliprofundum\_boo\_\_CAS-III-A:0.79798000,(268317193\_Rhodothermus\_mar\_\_CAS-I-A:1.07613000,(154174706\_Campylobacter\_cur\_\_CAS-I-B:0.73180000,28211140\_Clostridium\_tet\_\_CAS-I-B:0.51649000)0.92:0.28583000)0.36:0.15318000)0.71:0.11810000)0.92:0.30744000,18977491\_Pyrococcus\_fur\_\_CAS-I-B:0.40489000)0.57:0.16692000,(48477076\_Picrophilus\_tor\_\_CAS-I-D:0.57967000,292492937\_Nitrosococcus\_hal\_\_CAS-I-D:0.206459000)0.80:0.65148000)0.91:0.44422000)0.99:0.77832000,(((((((159898754\_Herpetosiphon\_aur\_\_CAS-I-D:0.42938000,(38505683\_Synechocystis\_sp\_\_CAS-I-D:0.60781000,46255268\_Thermus\_the\_\_CAS-I-A:0.79859000)0.87:0.17858000)0.86:0.16668000,(((86742031\_Frankia\_CcI\_\_CAS-I-C:0.80886000,433631664\_Mycobacterium\_can\_\_CAS-I-C:0.72421000)0.95:0.40152000,((189485222\_uncultured\_Ter\_\_CAS-I-C:0.69171000,56965355\_Bacillus\_hal\_\_check:0.50337000)0.86:0.25583000,108757432\_Myxococcus\_xan\_\_CAS-I-C:0.55447000)0.02:0.08514000)0.98:0.37358000,(302391601\_Acetohalobium\_ara\_\_CAS-I-D:0.50266000,17229059\_Nostoc\_sp\_\_CAS-I-D:0.66094000)0.17:0.14424000)0.77:0.10147000)0.49:0.10657000,344996860\_Caldicellulosiruptor\_lac\_\_CAS-I-D:1.17966000)0.54:0.03556000,134299482\_Desulfotomaculum\_red\_\_CAS-III-A:0.72503000)0.83:0.09076000,(((39995168\_Geobacter\_sul\_\_CAS-I-Cu:0.18797000,83591519\_Rhodospirillum\_rub\_\_CAS-I-Cu:0.67734000)0.91:0.14642000,320102061\_Isosphaera\_pal\_\_CAS-I-Cu:0.29118000)0.59:0.09049000,378719041\_Gordonia\_pol\_\_CAS-I-Cu:0.76296000)0.86:0.12732000,268318441\_Rhodothermus\_mar\_\_CAS-I-C:0.35064000)0.86:0.14406000,134101617\_Saccharopolyspora\_ery\_\_CAS-III-A:0.92088000)0.97:0.30155000)0.76:0.10722000,(294828260\_Leptospira\_int\_\_CAS-I-C:0.34485000,347756303\_Candidatus\_ChI\_\_CAS-I-C:0.62198000)1.00:0.82703000)0.79:0.16940000,76802275\_Natronomonas\_pha\_\_CAS-I-D:1.19261000)0.84:0.23501000,167627879\_Francisella\_nov\_\_check:2.53097000,219683006\_Bifidobacterium\_ani\_\_CAS-I-Cu:1.03586000)0.60263000)0.12:0.15433000)0.19:0.04486000,(332296539\_Thermodesulfobium\_nar\_\_CAS-III-A:2.10154000,(18311697\_Pyrobaculum\_aer\_\_CAS-I-A:1.34349000,15896973\_Sulfolobus\_sol\_\_check:2.11406000)0.32:0.26671000)0.02:0.20274000)0.43:0.05955000,(((18311770\_Pyrobaculum\_aer\_\_CAS-I-A:1.04920000,(124027531\_Hyperthermus\_but\_\_CAS-I-A:1.08384000,(156937923\_Ignicoccus\_hos\_\_CAS-I-A:1.64041000,118431378\_Aeropyrum\_per\_\_CAS-I-A:0.62763000)0.73:0.12480000,(305663328\_Ignisphaera\_agg\_\_CAS-I-A:0.64154000,307595805\_Vulcanisaeta\_dis\_\_CAS-I-A:0.34920000)0.96:0.35574000)0.14:0.05870000)0.24:0.21397000)0.80:0.16355000,(385805117\_Fervidicoccus\_fon\_\_CAS-I-A:1.48413000,(((218884091\_Desulfurococcus\_kam\_\_CAS-I-A:0.89263000,389861366\_Thermogladus\_cel\_\_CAS-I-A:0.52075000)0.92:0.41883000,347523047\_Pyrolobus\_fum\_\_CAS-I-A:1.69446000)0.60:0.04774000,(302347806\_Acidilobus\_sac\_\_CAS-I-A:1.01638000,(15898285\_Sulfolobus\_sol\_\_CAS-I-A:0.78934000,15922977\_Sulfolobus\_tok\_\_CAS-I-A:0.61606000)0.94:0.36412000)0.85:0.25630000)0.84:0.12943000)0.90:0.22262000)0.75:0.19330000,(((((((284040853\_Spirosoma\_lin\_\_CAS-I-B:0.63299000,21226659\_Methanosarcina\_maz\_\_CAS-I-B:0.36828000)0.01:0.10159000,(218961575\_Candidatus\_Clo\_\_CAS-I-B:0.52444000,150401499\_Methanococcus\_ao\_\_CAS-I-B:0.46347000)0.16:0.01868000)0.89:0.24404000,257125860\_Leptotrichia\_buc\_\_CAS-III-A:1.09081000)0.97:0.41375000,(383319611\_Methanocella\_con\_\_CAS-I-A:0.66135000,11499461\_Archaeoglobus\_ful\_\_CAS-I-A:0.51463000)0.97:0.34472000)0.89:0.14938000,(330509015\_Methanosaeta\_con\_\_CAS-I-A:0.50473000,408403002\_Candidatus\_Nit\_\_CAS-I-B:0.92921000)0.89:0.21520000)0.72:0.06975000,(((148656006\_Roseiflexus\_sp\_\_CAS-I-B:0.57761000,386854795\_Deinococcus\_gob\_\_CAS-I-A:0.79274000)0.84:0.17086000,((54296141\_Legionella\_pne\_\_CAS-II-B:0.54352000,34557935\_Wolinella\_suc\_\_CAS-II-B:0.66238000)0.97:0.37315000,118497355\_Francisella\_nov\_\_CAS-II-B:0.54478000)0.98:0.50460000)0.41:0.18627000,167628644\_Heliobacterium\_mod\_\_CAS-I-A:0.76117000)0.84:0.18847000)0.85:0.14480000,(170290049\_Candidatus\_Kor\_\_CAS-I-A:0.72124000,126465229\_Staphylothermus\_mar\_\_CAS-I-A:0.38343000)1.00:0.75378000)0.80:0.11271000)0.89:0.21765000)1.00:0.90558000);

**Supplementary Figure S3. Multiple sequence alignments of type I and type III CRISPR repeats.** See Figure 3. The alignments of short (24-26 nt) type I-A (**A**) and long (37 nt) type I and type III (**B**) CRISPR repeats used to create the logoplots of consensus repeat sequences are shown.

**A**

|                                            |                            |
|--------------------------------------------|----------------------------|
| <i>Pyrolobus fumarii</i> 1A                | GAAACAAC-CAAGAATGAATTGAAAG |
| <i>Ignisphaera aggregans</i> DSM 17230     | GAAAC-TCCCAAAAGGGAGTAGAAAG |
| <i>Hyperthermus butylicus</i> DSM 5456     | GAACA-ACTCAAAAGAGAATTGCAAG |
| <i>Thermogladius cellulolyticus</i> 1633   | GAAGCAA-TCAAGAA-GAATTGAAAG |
| <i>Desulfurococcus kamchatkensis</i> 1221n | GAATA--CAATAGAAAGAATTGAAAG |
| <i>Pyrobaculum aerophilum</i> str. IM2     | GAA-TCT-CAAAAAGAGGATTGAAAG |
| <i>Fervidicoccus fontis</i> Kam940         | GAA-TCTGTT-AGATAGAATTGAAAG |
| <i>Sulfolobus tokodaii</i> str. 7          | GATAA-TCCTTAATG-GAATTGAAAG |
| <i>Sulfolobus solfataricus</i> P2          | GATAA-TCTCTTAT-AGAATTGAAAG |
| <i>Vulcanisaeta distributa</i> DSM 14429   | GATAT-TCTCTAAAGAGAATAGAAGG |
| <i>Sulfolobus solfataricus</i> P2          | GATTAATCCCAAAAG-GAATTGAAAG |
| <i>Aeropyrum pernix</i> K1                 | GCATA-TCCCTAAAGGGAATAGAAAG |
| <i>Ignicoccus hospitalis</i> KIN4/1        | GTGAAGTCTCAAAAGAGGATAGAAAG |
| <i>Acidilobus saccharovorans</i> 345-15    | GTTGCAACACCATCTCGTGGTTTCC- |
| <i>Pyrobaculum aerophilum</i> str. IM2     | GTTTCAACTATCTTTTGATTTCTG-G |

**B**

|                                           |                                        |
|-------------------------------------------|----------------------------------------|
| <i>Desulfobacca acetoxidans</i> DSM 11109 | GTCGCAATCCCTTCGTAATCAGGTCAATGAAGCAGAG  |
| <i>Porphyromonas gingivalis</i> W83       | GTCTTAATAGCCTTACGGACTGTGTATGTATAGTGAG  |
| <i>Helicobacter cetorum</i> MIT 00-7128   | GTTTCAATCCCCTTGAACGGGTCAATCTGTAATAAAT  |
| <i>Heliobacterium modesticaldum</i> lce1  | GTTTCACTGGATGACCCGCTATGTAGGGGATTGAAAG  |
| <i>Roseiflexus</i> sp. RS-1               | GTTTCAGTACTCTTCAACGAGTCGAAATTGCCGAAAT  |
| <i>Deinococcus gobiensis</i> I-0          | GTTTTCAGTCCCCTATCGCCCGGGGAGTACGTTGCGGC |



Jnet 331001027  
P. excrementihominis  
W. succinogenes  
L. pneumophila  
S. wadsworthensis  
HTC5015  
F. novicida  
consensus/95%  
consensus/85%  
  
A. coloeocanis  
C. glomerans  
Acidaminococcus D21  
V. atypica  
F. nucleatum  
F. locis  
S. moorei  
C. catus  
T. denticola  
P. dusterdenii  
C. miesoukai  
S. thermophilus  
S. mutans  
S. pyogenes

domains  
catalytic residues  
domains  
catalytic residues  
  
B. bifidum  
O. kitaharae  
S. sanguinis  
F. fructosus  
E. yurii  
L. farcininis  
S. pseudintermedium  
L. rhamnosus  
F. magna  
P. antarcticus  
consensus/95%  
consensus/85%

Jnet 227501312  
M. mobile  
M. gallisepticum  
M. synoviae  
M. ovipneumoniae  
M. canis  
consensus/95%  
consensus/85%

E. rectale  
E. faecalis  
S. thermophilus  
S. lugdunensis  
E. dolichum  
R. albus  
R. inulinivorans  
L. coryniformis  
I. polytropus  
consensus/95%  
consensus/85%

Bacteroides sp.20  
I. album  
B. fragilis  
N. salsginis  
E. minutum  
S. globus  
M. trichosporium  
F. branchiophilum  
Prevotella C561  
P. timonensis  
P. timonensis  
A. paucivorans  
P. marinum  
A. denitrificans  
R. syzygii  
D. shibae  
R. rubrum  
Azospirillum B510  
C. salinarum  
N. hamburgensis  
Bradyrhizobium BTA11  
W. succinogenes  
C. jejuni  
Jnet 218563121  
H. mustelae  
A. ebreus  
B. smithii  
C. cellulolyticum  
HF0070\_07E19  
P. lavamentivorans  
N. meningitidis  
P. multocida  
A. muciniphila  
Actinomyces F0310  
A. cellulolyticus  
B. longum  
A. naeslundii

domains  
catalytic residues  
  
A. hesperidum  
Alcanivorax W11-5  
B. zoohelcum  
Porphyromonas F0450  
B. intestinhominis  
O. laneus  
Trepionema JC4  
Rhodovulum PH10  
consensus/95%  
consensus/85%

#map \*\*\*\*\*



Jnet 331001027  
P. excrementihominis  
W. succinogenes  
L. pneumophila  
S. wadsworthensis  
HTCC5015  
F. novicida  
consensus/95%  
consensus/85%  
A. coleocanis  
C. glomerans  
Acidaminococcus D21  
V. atypica  
P. nucleatum  
F. aloecis  
S. moorei  
C. catus  
T. denticola  
P. duerdenii  
C. mitisukai  
S. thermophilus  
S. mutans  
S. pyogenes

domains  
catalytic residues  
domains  
catalytic residues

B. bifidum  
O. kitaharae  
S. sanguinis  
F. fructosus  
E. yurii  
L. farcinis  
S. pseudintermedius  
L. rhamnosus  
F. magna  
P. antarcticus  
consensus/95%  
consensus/85%  
Jnet 227501312  
M. mobile  
M. gallisepticum  
M. syroviae  
M. cypripneumoniae  
M. canis  
consensus/95%  
consensus/85%  
E. rectale  
E. faecalis  
S. thermophilus  
S. lugdunensis  
E. dolichum  
R. albus  
R. imulinivorans  
L. coryniformis  
I. polytropus  
consensus/95%  
consensus/85%  
Bacteroides sp.20  
I. album  
B. fragilis  
N. salsguinis  
E. minutum  
S. globus  
M. trichosporium  
F. branchiophilum  
Prevotella C561  
P. timonensis  
P. timonensis  
A. paucivorans  
P. marinum  
A. denitrificans  
R. syzygii  
D. shibae  
R. rubrum  
Azospirillum B510  
C. salinarum  
N. hamburgensis  
Bradyrhizobium BTA11  
W. succinogenes  
C. jejuni  
Jnet 21856121  
H. mustelae  
A. ebreus  
B. smithii  
C. cellulolyticum  
HF0070\_07E19  
P. lavamentivorans  
N. meningitidis  
P. multocida  
A. muciniphila  
Actinomyces F0310  
A. cellulolyticus  
B. longum  
A. naeslundii

domains  
catalytic residues

A. hesperidum  
Alcanivorax W11-5  
B. zoohelcum  
Porphyromonas F0450  
B. intestinhominis  
O. laneus  
Treponema JC4  
Rhodovulum PH10  
consensus/95%  
consensus/85%  
#map

Jnet 331001027
P. excrementihominis
W. succinogenes
L. pneumophila
S. wadsworthensis
HTCC5015
F. novicida
consensus/95%
consensus/85%
A. coleocanis
C. glomerans
Acidaminococcus D21
V. atypica
P. nucleatum
F. aloecis
S. moorei
C. catus
T. denticola
P. duerdenii
C. mitisokai
S. thermophilus
S. mutans
S. pyogenes

domains
catalytic residues
domains
catalytic residues

B. bifidum
O. kitaharae
S. sanguinis
F. fructosus
E. yurii
L. farcininis
S. pseudintermedius
L. rhamnosus
F. magna
P. antarcticus
consensus/95%
consensus/85%

Jnet 227501312
M. mobile
M. gallisepticum
M. synoviae
M. ovipneumoniae
M. canis
consensus/95%
consensus/85%

E. rectale
E. faecalis
S. thermophilus
S. lugdunensis
E. dolichum
R. albus
R. inulinivorans
L. coryniformis
I. polytropus
consensus/95%
consensus/85%

Bacteroides sp.20
I. album
E. fragilis
N. salusginis
E. minutum
S. globus
M. trichosporium
F. branchiophilum
Prevotella C561
P. timonensis
P. timonensis
A. paucivorans
P. marinum
A. denitrificans
R. syzygii
D. shibae
R. rubrum
Azospirillum B510
C. salinarum
N. hamburgensis
Bradyrhizobium BTA11
W. succinogenes
C. jejuni
Jnet 218563121
H. mustelae
A. ebreus
B. smithii
C. cellulolyticum
HF0070\_07E19
P. lavamentivorans
N. meningitidis
P. multocida
A. muciniphila
Actinomyces F0310
A. cellulolyticus
B. longum
A. naeslundii

domains
catalytic residues

A. hesperidum
Alcanivorax W11-5
B. zoohelcum
Porphyromonas F0450
B. intestinhominis
O. laneus
Treponema JC4
Rhodovulum PH10
consensus/95%
consensus/85%

#map







Jnet 331001027
P. excrementihominis
W. succinigenes
L. pneumophila
S. wadsworthensis
HTCC5015
P. novida
consensus/95%
consensus/85%
A. coleocanis
C. glomerans
Acidimannococcus D21
V. atypica
P. neutratum
P. allocis
S. moorei
C. catus
T. denticola
P. duerdenii
C. mitsuokai
S. thermophilus
S. mutans
S. pyogenes

domains
catalytic residues
domains
catalytic residues

B. bifidum
O. kitaharae
S. sanguinis
F. fructosus
E. yurii
L. farcininis
S. pseudintermedius
L. rhamnosus
F. magna
P. antarcticus
consensus/95%
consensus/85%

Jnet 227501312
M. mobile
M. gallisepticum
M. synoviae
M. ovipneumoniae
M. canis
consensus/95%
consensus/85%

E. rectale
E. faecalis
S. thermophilus
S. lugdunensis
E. dolichum
R. albus
R. inulinivorans
L. coryniformis
I. polytropus
consensus/95%
consensus/85%

Bacteroides sp.20
I. album
E. fragilis
N. salusginis
E. minutum
S. globus
M. trichosporium
F. branchiophila
Prevotella C561
P. timonensis
P. timonensis
A. paucivorans
P. marinum
A. denitrificans
R. syzygii
D. shibae
R. rubrum
Azospirillum B510
C. salinarum
N. hamburgensis
Bradyrhizobium BTA11
W. succinigenes
C. jejuni
Jnet 218563121
H. mustelae
A. ebreus
B. smithii
C. cellulolyticum
HF0070\_07E19
P. lavamentivorans
N. meningitidis
P. multocida
A. muciniphila
Actinomyces F0310
A. cellulolyticus
B. longum
A. naeslundii

domains
catalytic residues

A. hesperidum
Alcanivorax W11-5
B. zoohelium
Porphyromonas F0450
B. intestinhominis
O. lanus
Treponema JC4
Rhodovulum PH10
consensus/95%
consensus/85%

#map

Jnet 331001027  
P. excrementihominis  
W. succinogenes  
L. pneumophila  
S. wadsworthensis  
HTC5015  
F. novicida  
consensus/95%  
consensus/85%

A. coleocanis  
C. glomerans  
Acidaminococcus D21  
V. atypica  
P. nucleatum  
F. aloocis  
S. moorei  
C. catus  
T. denticola  
P. duerdenii  
C. suisuokai  
S. thermophilus  
S. mutans  
S. pyogenes

domains  
catalytic residues  
domains  
catalytic residues

B. bifidum  
O. kitaharae  
S. sanguinis  
F. fructosus  
E. yurii  
L. farcininis  
S. pseudintermedius  
L. rhamnosus  
F. magna  
P. antarcticus  
consensus/95%  
consensus/85%

Jnet 227501312  
M. mobile  
G. gallisepticum  
M. synoviae  
S. ovipneumoniae  
M. canis  
consensus/95%  
consensus/85%

E. rectale  
E. faecalis  
S. thermophilus  
S. lugdunensis  
E. dolichum  
R. albus  
R. inulinivorans  
L. coryniformis  
I. polytropus  
consensus/95%  
consensus/85%

Bacteroides sp.20  
E. fragilis  
N. salusginis  
E. minutum  
S. globus  
M. trichosporium  
F. branchiophilum  
Prevotella C561  
P. timonensis  
P. timonensis  
A. paucivorans  
P. marinum  
A. dentrificans  
R. syzygii  
D. shibae  
R. rubrum  
Azospirillum B510  
C. salinarum  
N. hamburgensis  
Bradyrhizobium BTA11  
W. succinogenes  
C. jejuni  
Jnet 218563121  
H. mustelae  
A. ebreus  
B. smithii  
C. cellulolyticum  
HF0070\_07E19  
P. lavamentivorans  
N. meningitidis  
F. multocida  
A. muciniphila  
Actinomyces F0310  
A. cellulolyticus  
B. longum  
A. naeslundii

domains  
catalytic residues

A. hesperidum  
Alcanivorax W11-5  
B. zoohelium  
Porphyromonas F0450  
B. intestinhominis  
O. laneus  
Treponema Jc4  
Rhodovulum PH10  
consensus/95%  
consensus/85%

map



Jnet 331001027  
P. excrementihominis  
W. succinigenes  
L. pneumophila  
S. wadsworthensis  
HTCC5015  
F. novicida  
consensus/95%  
consensus/85%

A. coleocanis  
C. glomerans  
Acidaminococcus D21  
V. atypica  
P. nucleatum  
F. aloecis  
S. moorei  
C. catus  
T. denticola  
P. duerdenii  
C. mitisuoaki  
S. thermophilus  
S. mutans  
S. pyogenes

domains  
catalytic residues  
domains  
catalytic residues

B. bifidum  
O. kitaharae  
S. sanguinis  
F. fructosus  
E. yurii  
L. farcininis  
S. pseudintermedius  
L. rhamosus  
F. magna  
P. antarcticus  
consensus/95%  
consensus/85%

Jnet 227501312  
M. mobile  
M. gallesepticum  
M. synoviae  
M. ovipneumoniae  
M. canis  
consensus/95%  
consensus/85%

E. rectale  
E. faecalis  
S. thermophilus  
S. lugdunensis  
E. dolichum  
R. albus  
R. inulinivorans  
L. coryniformis  
I. polytropus  
consensus/95%  
consensus/85%

Bacteroides sp.20  
I. album  
B. fragilis  
N. salusginis  
E. minutum  
S. globus  
M. trichosporium  
P. branchiophilum  
Prevotella C561  
P. timonensis  
P. timonensis  
A. paucivorans  
P. marinum  
A. denitrificans  
R. syzygii  
D. shibae  
R. rubrum  
Azospirillum B510  
C. salinarum  
N. hamburgensis  
Bradyrhizobium BTA11  
W. succinigenes  
C. jejuni  
Jnet 218563121  
H. mustelae  
A. ebreus  
B. smithii  
C. cellulolyticum  
HF0070\_07E19  
P. lavamentivorans  
N. meningitidis  
M. multicida  
A. muciniphila  
Actinomyces F0310  
A. cellulolyticus  
B. longum  
A. naeslundii

domains  
catalytic residues

A. hesperidum  
Alcanivorax W11-5  
B. zoohelium  
Porphyromonas F0450  
B. intestinihominis  
O. lanus  
Treponema JC4  
Rhodovulum PH10  
consensus/95%  
consensus/85%

map

Jnet 331001027  
P. excrementihominis  
W. succinogenes  
L. pneumophila  
S. wadsworthensis  
HTCC5015  
P. novicida  
consensus/95%  
consensus/85%  
A. coleocanis  
C. glomerans  
Acidaminococcus D21  
V. atypica  
P. nucleatum  
F. alocis  
S. moorei  
C. catus  
T. denticola  
P. duerdenii  
C. mitisukoi  
S. thermophilus  
S. mutans  
S. pyogenes

domains  
catalytic residues  
domains  
catalytic residues

B. bifidum  
O. kitaharae  
S. sanguinis  
F. fructosus  
E. yurii  
L. farcinimus  
S. pseudintermedius  
L. rhamnosus  
F. magna  
P. antarcticus  
consensus/95%  
consensus/85%

Jnet 227501312  
M. mobile  
M. gallisepticum  
M. synoviae  
M. ovipneumoniae  
M. canis  
consensus/95%  
consensus/85%

E. rectale  
E. faecalis  
S. thermophilus  
S. lugdunensis  
E. dolichum  
R. albus  
R. inulinivorans  
L. corniformis  
I. polytropus  
consensus/95%  
consensus/85%

Bacteroides sp.20  
I. album  
B. fragilis  
N. salusginis  
E. minutum  
S. globus  
M. trichosporium  
F. branchiophilum  
Prevotella C561  
P. timonensis  
P. timonensis  
A. paucivorans  
P. marinum  
A. denitrificans  
R. syzygii  
D. shibae  
R. rubrum  
Azospirillum B510  
C. salinarum  
N. hamburgensis  
Bradyrhizobium BTA11  
W. succinogenes  
C. jejuni  
Jnet 218563121  
H. mustelae  
A. ebreus  
B. smithii  
C. cellulolyticum  
HF0070\_07E19  
P. lavamentivorans  
N. meningitidis  
P. multocida  
A. muciniphila  
Actinomyces F0310  
A. cellulolyticus  
B. longum  
A. naeslundii

domains  
catalytic residues

A. hesperidum  
Alcanivorax W11-5  
B. zoohelium  
Porphyromonas F0450  
B. intestinhominis  
O. laneus  
Treponema JC4  
Rhodovulum PH10  
consensus/95%  
consensus/85%

#map

Jnet 331001027 -----EEE-----EEEE-----EEEE-----EEEE-----HHHH-----HHHHHHHHHHHH-----HHH-H-----  
P. excrementihominis -----TGRPLDDV-----GEIDHIIIPRSI-----TLKKSSEIYNSEVNIIPVSAQGNQ-----EKKNNIYLIS-----NLAKNYLAAVFGTSDLSQITNEIESTV-----LQL-KAAGRIL-----  
W. succinogenes -----CGTITGDD-----GEIDHIIIPRSI-----TLKIIYGVTFNPEGNLIIVHQQCKN-----AKADSIYLLS-----DIKA-----GVSAQWIEEGV-----ANI-KGY-----  
L. pneumophila -----KGASIQGQ-----GEIDHIIIPRSI-----SKKHFGVFNSEVNIIVCSSQGNR-----EKKSEIYLLS-----HLSPFLFKHQFGTDNVDIKNFISQNV-----ANI-KKY-----  
S. wadsworthensis -----TGRILAEQ-----GEIDHIIIPRSI-----TKDARGIVFNAEENLIIVASSQGNQ-----LKKQVYSLI-----DLKAYNEIFKTSNIAATPAEIEEDV-----TKL-QGTHRI-----  
HTCC5015 -----TGRAPLGS-----GEIDHIIIPRSI-----TGRTKKIVFNAEENLIIVCSSQGNH-----DKGNRVVIE-----QLNDYKLFQFSTSDNLIKKIKITTI-----QRFTGGKGL-----  
F. novicida -----SGANLTGDFPDGAK-----EELDHIIPRS-----HKYKGTLDNEANLIIVCTRGDNK-----NKNRIFPCILR-----DLANDYKLFQFSTDDLEIEKKIADITWANKDKPFF-GNY-----  
consensus/95% -----G.h.h-----EHDIIIPRS-----c.c.h.N.E.NLI-----N.K.a.a.h-----h-----I.h.h-----h-----  
consensus/85% -----G.h.h-----EHDIIIPRS-----c.c.h.N.E.NLI-----N.K.a.a.h-----h-----I.h.h-----h-----

A. coleocanis -----CGTALTIVN-----SEMDHIVPRAGLGS-----NTRNDLVATCERCMK-SKSN-KPPAV-----WAAECGIP-GVSAEALK-----RVDF-----WIADG-FASSK-----  
C. glomerans -----SGRAIDIHQLSNAGI-----YVDHIIIPRTY-VKD-----DSLANKVLYREENQ-RKTDMLLIDP-----EIRRRMSGVWR-----MYHE-----AKLIG-----  
Acidaminococcus D21 -----TGDPIKLEHIKQDSF-----YVDHIIIPQSM-VKD-----DSLANKVLYREENQ-RKTDMLLIDP-----EIRRRMSGVWR-----MYHE-----AKLIG-----  
V. atypica -----TGMNIDLNLQNTDN-----YVDHIIIPRSI-TKD-----DSFDNLVLCERTANA-KKSDIYPIIDN-----RIQTKQKFFWA-----FLKH-----QGLIS-----  
F. nucleatum -----TGREIDLRLQNNYD-----YVDHIIIPRSI-TKD-----DSFDNLVLYLKNENA-EKSNEYVFKK-----EIQEKMSKFFWR-----FLKE-----KNFIS-----  
F. aloocis -----SGDDIDLINELIRGNSK-----WDRDHIIPQSK-TKD-----DSIDNLVLVNKTINA-KKSNELLED-----IQKMHMSFWL-----SLLN-----KKLIT-----  
C. moorei -----TGRIDPDKLINDKNT-----YVDHIIIPRSI-TKD-----DSITNRVLEKIDING-EKTDIYPISE-----DIRQKQKFFWA-----ILKE-----KGLIN-----  
C. catus -----SGETIQDLDELWNTK-----YVDHIIIPQSK-TMD-----DSLANNRVLVKKYNA-IKSDTVPYLSL-----DIQKMSKFFWR-----MLQK-----QGFIT-----  
T. denticola -----CGKPIEIGHVFTTSN-----YVDHIIIPQSK-TMD-----DSISNRVLCVSSCNK-NKEDKVPYLSK-----EIQKQKQGFVN-----FLQR-----NPFIS-----  
P. dierudii -----SGEIDILADLKSNNI-----YVDHIIIPQSK-TMD-----DSLANNRVLVKKYNA-IKSDTVPYLSL-----DIQKMSKFFWR-----MLQK-----QGFIT-----  
C. misuii -----SGKLLIDSLDK-----YVDHIIIPQSK-TMD-----DSFDNRVLYVPSNQ-RKLDLVVFPF-----DIRDKMYPFW-----LFLD-----KGLIS-----  
S. thermophilus -----TGBDLDLDRLSN-----YVDHIIIPQAF-LKD-----NSIDNKLVLSSASNR-GKSDVPSLFE-----VVKRRTFFYF-----QLK-----SKLIS-----  
S. mutans -----TGBEIDLIDYLSQ-----YVDHIIIPQAF-LKD-----NSIDNRVLTSSKENR-GKSDVPSKLD-----VVRKMSYSWS-----KLLS-----AKLIT-----  
S. pyogenes -----VDQELDIRLSD-----YVDHIIIPQAF-LKD-----DSIDNKLVLTRSDKNR-GKSDVPSSEE-----VVKKMKNYWR-----QLLN-----AKLIT-----

domains -----HHHHHH-----HHHHHH-----HHHHHH-----HHHHHH-----HHHHHH-----HHHHHH-----HHHHHH-----HHHHHH-----HHHHHH-----HHHHHH-----  
catalytic residues -----HHHHHH-----HHHHHH-----HHHHHH-----HHHHHH-----HHHHHH-----HHHHHH-----HHHHHH-----HHHHHH-----HHHHHH-----HHHHHH-----  
domains -----HHHHHH-----HHHHHH-----HHHHHH-----HHHHHH-----HHHHHH-----HHHHHH-----HHHHHH-----HHHHHH-----HHHHHH-----HHHHHH-----  
catalytic residues -----HHHHHH-----HHHHHH-----HHHHHH-----HHHHHH-----HHHHHH-----HHHHHH-----HHHHHH-----HHHHHH-----HHHHHH-----HHHHHH-----

B. bifidum -----TGBEILDRLSSA-----YVDHIIIPQAF-TQN-----DSIDNRVLYVPSNQ-RKLDLVVFPF-----DIRDKMYPFW-----LFLD-----KGLIS-----  
O. kitaharae -----SGEKLNLNLSN-----YVDHIIIPQAF-TKD-----DSLANKVLYREENQ-RKTDMLLIDP-----EIRRRMSGVWR-----MYHE-----AKLIG-----  
S. sanguinis -----TLDKTGSAPALYLDQDQ-----YVDHIIIPQAF-LPI-----DSIDNKLVLTHRENNQ-QKLANLIY-DK-----ETVANMKFFWE-----KLVN-----AKLIS-----  
F. fructosus -----TGRPIINFERLSQD-----YVDHIIIPQAF-TKD-----DSLANKVLYREENQ-RKTDMLLIDP-----EIRRRMSGVWR-----MYHE-----AKLIG-----  
E. yurii -----SGEVLKDKLMDDN-----LYVDHIIIPRSI-VKD-----DSLANKVLYREENQ-RKTDMLLIDP-----EIRRRMSGVWR-----MYHE-----AKLIG-----  
L. farcinis -----SEESLNINKLSD-----YVDHIIIPRTY-IPD-----DSLANKVLYREENQ-RKTDMLLIDP-----EIRRRMSGVWR-----MYHE-----AKLIG-----  
S. pseudintermedius -----SQSILDALLSPNATHYVHIFPSPF-TKD-----DSIDNKLVLKKNNA-EKSNEYVFKK-----EIQEKMSKFFWR-----FLKE-----KNFIS-----  
L. rhamnosus -----TGPLNIDLQSL-----YVDHIIIPQAF-LKD-----NSIDNKLVLTHRENNQ-QKLANLIY-DK-----ETVANMKFFWE-----KLVN-----AKLIS-----  
F. magna -----TGEKIDLKLFDSH-----YVDHIIIPQAF-LKD-----NSIDNKLVLTHRENNQ-QKLANLIY-DK-----ETVANMKFFWE-----KLVN-----AKLIS-----  
P. antarcticus -----TGKALDIQNLMS-----YVDHIIIPQAF-LKD-----NSIDNKLVLTHRENNQ-QKLANLIY-DK-----ETVANMKFFWE-----KLVN-----AKLIS-----  
consensus/95% -----h.h.h-----a.d.IHP-----h-----h-----h-----h-----h-----h-----h-----h-----h-----h-----h-----h-----  
consensus/85% -----o.o.h.h.L-----Y.H.IHP-----h-----h-----h-----h-----h-----h-----h-----h-----h-----h-----h-----h-----

Jnet 227501312 -----EEEE-----HHHHHHHHHH-----HH-----HH-----HH-----HH-----HH-----HH-----HH-----HH-----HH-----HH-----  
M. mobile -----SLRKEIANDVINKPNN-----YVDHIIIPRSI-SFD-----DSFDNLVLYREENQ-RKTDMLLIDP-----EIRRRMSGVWR-----MYHE-----AKLIG-----  
M. galisepticum -----SLKEIAFDPIFKTEK-----YVDHIIIPRSI-SFD-----DSFDNLVLYREENQ-RKTDMLLIDP-----EIRRRMSGVWR-----MYHE-----AKLIG-----  
M. synoviae -----TQLDINKINEIDE-----YVDHIIIPRSI-SAD-----DSFDNLVLYREENQ-RKTDMLLIDP-----EIRRRMSGVWR-----MYHE-----AKLIG-----  
M. ovipneumoniae -----TLDKINIDLINGSQ-----YVDHIIIPRSI-SAD-----DSFDNLVLYREENQ-RKTDMLLIDP-----EIRRRMSGVWR-----MYHE-----AKLIG-----  
M. canis -----TGAQISVNEIVN-----YVDHIIIPRSI-SAD-----DSFDNLVLYREENQ-RKTDMLLIDP-----EIRRRMSGVWR-----MYHE-----AKLIG-----  
consensus/95% -----o.o.I.h.h-----I-hhP.S.h-----h-----h-----h-----h-----h-----h-----h-----h-----h-----h-----h-----h-----  
consensus/85% -----o.o.I.h.h-----I-hhP.S.h-----h-----h-----h-----h-----h-----h-----h-----h-----h-----h-----h-----h-----

E. rectale -----SGKITDPNDIINNQL-----FEIDHIIIPRSI-SFD-----DARSNKVLVYREENQ-RKTDMLLIDP-----EIRRRMSGVWR-----MYHE-----AKLIG-----  
E. faecalis -----TGLPISELLVSDS-----FEIDHIIIPRSI-SLD-----DARSNKVLVYREENQ-RKTDMLLIDP-----EIRRRMSGVWR-----MYHE-----AKLIG-----  
S. thermophilus -----TGKTIISIDLINNSQ-----FEVDHIIIPRSI-TFD-----DSLANKVLYREENQ-RKTDMLLIDP-----EIRRRMSGVWR-----MYHE-----AKLIG-----  
S. lugdunensis -----SLESIPLEDLLNPNH-----YVDHIIIPRSI-SFD-----DSFDNLVLYREENQ-RKTDMLLIDP-----EIRRRMSGVWR-----MYHE-----AKLIG-----  
E. dolichum -----SLEPIDLKLLIDDPNA-----YVDHIIIPRSI-SLD-----DARSNKVLVYREENQ-RKTDMLLIDP-----EIRRRMSGVWR-----MYHE-----AKLIG-----  
R. albus -----SGETITKEDMLRDKDKL-----FEVDHIIIPRSI-ILD-----DSIDNKLVLTHRENNQ-QKLANLIY-DK-----ETVANMKFFWE-----KLVN-----AKLIS-----  
L. inulinivorans -----SGKIPLEELFDGG-----YVDHIIIPRSI-TFD-----DSYRNKVLVYREENQ-RKTDMLLIDP-----EIRRRMSGVWR-----MYHE-----AKLIG-----  
R. coryniformis -----TGDQIPPERAFSEG-----YVDHIIIPRSI-SWD-----DSYRNKVLVYREENQ-RKTDMLLIDP-----EIRRRMSGVWR-----MYHE-----AKLIG-----  
I. polytropus -----SRKELSLSEVILDESM-----TDHIIIPRSI-SMD-----DSYRNKVLVYREENQ-RKTDMLLIDP-----EIRRRMSGVWR-----MYHE-----AKLIG-----  
consensus/95% -----o.o.h.h.h-----h-----h-----h-----h-----h-----h-----h-----h-----h-----h-----h-----h-----  
consensus/85% -----o.o.I.h.h-----h-----h-----h-----h-----h-----h-----h-----h-----h-----h-----h-----h-----

Bacteroides sp.20 -----TGEMIPLSKLFPPA-----YEIHHIIPQAF-TQN-----DSIDNRVLYVPSNQ-RKLDLVVFPF-----DIRDKMYPFW-----LFLD-----KGLIS-----  
I. album -----TCHILPISKLFDSNV-----YEIHHIIPRSI-MKH-----DSIDNRVLYVPSNQ-RKLDLVVFPF-----DIRDKMYPFW-----LFLD-----KGLIS-----  
E. fragilis -----SNTYISREKLFSEK-----YVDHIIIPQAF-LPD-----DSFDNLVLYREENQ-RKTDMLLIDP-----EIRRRMSGVWR-----MYHE-----AKLIG-----  
N. salusginis -----SGKVINLSQLDGS-----ADIEHIIIPQAF-LPD-----DSFDNLVLYREENQ-RKTDMLLIDP-----EIRRRMSGVWR-----MYHE-----AKLIG-----  
E. minutum -----CGCQISPNDIINNQ-----ADIEHIIIPQAF-LPD-----DSFDNLVLYREENQ-RKTDMLLIDP-----EIRRRMSGVWR-----MYHE-----AKLIG-----  
S. globus -----CLEHISVADIAAGR-----ADVDHIIIPRSI-SFD-----DSFDNLVLYREENQ-RKTDMLLIDP-----EIRRRMSGVWR-----MYHE-----AKLIG-----  
M. trichosporium -----TDDYISPSQVATDAA-----VQVDHIIIPRSI-TAD-----DSYRNKVLVYREENQ-RKTDMLLIDP-----EIRRRMSGVWR-----MYHE-----AKLIG-----  
F. branchiophilum -----EKGKNIISCDIIGSNA-----YVDHIIIPRSI-SFD-----DSFDNLVLYREENQ-RKTDMLLIDP-----EIRRRMSGVWR-----MYHE-----AKLIG-----  
Prevotella C561 -----TGRITNLSNLPDFA-----YVDHIIIPRSI-SFD-----DSFDNLVLYREENQ-RKTDMLLIDP-----EIRRRMSGVWR-----MYHE-----AKLIG-----  
P. timonensis -----TGEQIGITDFIGSNPK-----FDIEHTIIPQAF-GGD-----STQMNLTCDNFRNREVKKAKLPELANHEE-----ILTRIEPWNKYEQLVKERD-----KQRTFAGMDKAV-----KDIRIQKRHL-----  
P. timonensis -----TGEQIGITDFIGSNPK-----FDIEHTIIPQAF-GGD-----STQMNLTCDNFRNREVKKAKLPELANHEE-----ILTRIEPWNKYEQLVKERD-----KQRTFAGMDKAV-----KDIRIQKRHL-----  
A. paucivorans -----CEBYLNPTRALEPGY-----AEMDHIIPRSI-SLD-----NGWNNRVLVYREENQ-RKTDMLLIDP-----EIRRRMSGVWR-----MYHE-----AKLIG-----  
P. marinum -----TGKMSISDLFSDK-----VEIHHIIPRSI-TLD-----DSYRNKVLVYREENQ-RKTDMLLIDP-----EIRRRMSGVWR-----MYHE-----AKLIG-----  
A. dentrificans -----SGVQISAMLLSDE-----VEIHHIIPRSI-TLD-----DSYRNKVLVYREENQ-RKTDMLLIDP-----EIRRRMSGVWR-----MYHE-----AKLIG-----  
R. syzygii -----SGRQISLQRLFSND-----VQVDHIIIPRSI-TLD-----DSYRNKVLVYREENQ-RKTDMLLIDP-----EIRRRMSGVWR-----MYHE-----AKLIG-----  
D. shibae -----TGRISAAMIIPDGS-----CVDHIIPRSI-TLD-----DSYRNKVLVYREENQ-RKTDMLLIDP-----EIRRRMSGVWR-----MYHE-----AKLIG-----  
R. rubrum -----TSTPIGHADLLGDA-----YVDHIIIPRSI-TLD-----DSYRNKVLVYREENQ-RKTDMLLIDP-----EIRRRMSGVWR-----MYHE-----AKLIG-----  
Azospirillum B510 -----SGTISMRMLLSQ-----YVDHIIIPRSI-SLD-----DSYRNKVLVYREENQ-RKTDMLLIDP-----EIRRRMSGVWR-----MYHE-----AKLIG-----  
C. salinarum -----CAERPKLRATDLFSPA-----YVDHIIIPRSI-SLD-----DSYRNKVLVYREENQ-RKTDMLLIDP-----EIRRRMSGVWR-----MYHE-----AKLIG-----  
N. hamburgensis -----TGRQISLRLSDE-----YVDHIIIPRSI-TLD-----DSYRNKVLVYREENQ-RKTDMLLIDP-----EIRRRMSGVWR-----MYHE-----AKLIG-----  
Bradyrhizobium BTA11 -----TGBAIGLERLVSD-----YVDHIIIPRSI-SAD-----DSYRNKVLVYREENQ-RKTDMLLIDP-----EIRRRMSGVWR-----MYHE-----AKLIG-----  
W. succinogenes -----TGDVIELERLFDGQ-----CEIHHIIPRSI-SWD-----DSYRNKVLVYREENQ-RKTDMLLIDP-----EIRRRMSGVWR-----MYHE-----AKLIG-----  
C. jejuni -----SGEKIKISDLQDKEM-----LEIHHIIPRSI-SFD-----DSYRNKVLVYREENQ-RKTDMLLIDP-----EIRRRMSGVWR-----MYHE-----AKLIG-----  
Jnet 218563121 -----EEEEEEEE-----HHHHHHHHHH-----HH-----HH-----HH-----HH-----HH-----HH-----HH-----HH-----HH-----HH-----  
H. mustelae -----SGEKITIDHLDQRA-----LQIDHAFPLSR-SLD-----DSQNKVLYREENQ-RKTDMLLIDP-----EIRRRMSGVWR-----MYHE-----AKLIG-----  
A. ebreus -----SQQLDIDQRLVDHNY-----AQVDHIIIPRSI-SYD-----DSYRNKVLVYREENQ-RKTDMLLIDP-----EIRRRMSGVWR-----MYHE-----AKLIG-----  
B. smithii -----SLKPIELERLLEPGY-----YVDHIIIPRSI-SLD-----DSYRNKVLVYREENQ-RKTDMLLIDP-----EIRRRMSGVWR-----MYHE-----AKLIG-----  
C. cellulolyticum -----SGKPIVCDLLNLSL-----YVDHIIIPRSI-SMD-----DSYRNKVLVYREENQ-RKTDMLLIDP-----EIRRRMSGVWR-----MYHE-----AKLIG-----  
HF0070\_07E19 -----SGRMIPVNSVLSL-----YVDHIIIPRSI-SFD-----DSYRNKVLVYREENQ-RKTDMLLIDP-----EIRRRMSGVWR-----MYHE-----AKLIG-----  
P. lavamentivorans -----TGDQIGFNLFRGFR-----YVDHIIIPRSI-SFD-----DSYRNKVLVYREENQ-RKTDMLLIDP-----EIRRRMSGVWR-----MYHE-----AKLIG-----  
N. meningitidis -----SGKEINLGRLEKGY-----YVDHIIIPRSI-TWD-----DSYRNKVLVYREENQ-RKTDMLLIDP-----EIRRRMSGVWR-----MYHE-----AKLIG-----  
P. multocida -----SGKEINLGRLEKGY-----YVDHIIIPRSI-TWD-----DSYRNKVLVYREENQ-RKTDMLLIDP-----EIRRRMSGVWR-----MYHE-----AKLIG-----  
A. muciniphila -----TGATYGDHELEN-----LEIHHIIPRSI-RQS-----NALSLVLTWPGVNR-MKGQRTGYDF-----VEQEQNPVDPKPNLHICLSLNNYR-----LVEKLDKKGH-----  
Actinomyces F0310 -----CGNEINFQT-----YVDHIIIPRSI-SYD-----DSYRNKVLVYREENQ-RKTDMLLIDP-----EIRRRMSGVWR-----MYHE-----AKLIG-----  
A. cellulolyticus -----CGAPISWEN-----SELDHIIIPRSI-GGS-----NRENHAIITCGACNK-EKGR-RPFS-----WABTSNQRVLR-----DIVD-----RVQKL-----KY-----  
B. longum -----CGRTITPRT-----CEMDHIIIPRSI-GVST-----NTRNFAAVCAEBCNR-MKSN-TPAI-----WARSEDAQTRGVSLA-----EAKK-----RVMTPTFNFS-----  
A. naeslundii -----CGTITGVHT-----CQDHIIPQAF-GGSN-----NRRGNLVAVCBCNR-SKSN-TPAV-----WAQCKGIPHYGV-----EALG-----RVGRKQTPN-----

domains -----HHHHHH-----HHHHHH-----HHHHHH-----HHHHHH-----HHHHHH-----HHHHHH-----HHHHHH-----HHHHHH-----HHHHHH-----HHHHHH-----  
catalytic residues -----HHHHHH-----HHHHHH-----HHHHHH-----HHHHHH-----HHHHHH-----HHHHHH-----HHHHHH-----HHHHHH-----HHHHHH-----HHHHHH-----

A. hesperidum -----SGEKLDVTRLEP-----GYAEVDHIIIPQAF-TQN-----DSYRNKVLVYREENQ-RKTDMLLIDP-----EIRRRMSGVWR-----MYHE-----AKLIG-----  
Alcanivorax W11-5 -----CESNISLEQALSG-----AYNFEHIIIPRTY-IGQ-----RKRSELVLAHRECD-EKGNRTPEYQ-----FGHDDR-----KWR-----IVEQ-----PAMA-----LPI-KK-----  
B. zoohelium -----TQQPIPLSDFDK-----EKYVDHIIIPRSI-TGQ-----DSFDNLVLYREENQ-RKTDMLLIDP-----EIRRRMSGVWR-----MYHE-----AKLIG-----  
Porphyromonas P0450 -----CGSIEEQLRE-----GDMVEHIIIPRSI-LYD-----DSYRNKVLVYREENQ-RKTDMLLIDP-----EIRRRMSGVWR-----MYHE-----AKLIG-----  
B. intestinhominis -----CGQPVDVDFLRG-----PDVEHIIIPRSI-SFD-----DSYRNKVLVYREENQ-RKTDMLLIDP-----EIRRRMSGVWR-----MYHE-----AKLIG-----  
O. lanus -----TGKTLNISHTLGS-----NSVQIEHIIIPRSI-SLD-----DSLANKVLYREENQ-RKTDMLLIDP-----EIRRRMSGVWR-----MYHE-----AKLIG-----  
Treponema J04 -----CGKISGAEFLT-----EIEIHHIIPRSI-TLL-----DAESNLTVAHSSCNA-FKAERSPEFA-----FGTNP-----GYSWQ-----EIIQ-----RANQ-----LKYA-----  
Rhodovulum PH10 -----TGRAIGIAELPTS-----EVEIHHIIPRSI-TLD-----DSLANKVLYREENQ-RKTDMLLIDP-----EIRRRMSGVWR-----MYHE-----AKLIG-----  
consensus/95% -----h.h.h-----h-----h-----h-----h-----h-----h-----h-----h-----h-----h-----h-----h-----  
consensus/85% -----o.o.h.h.h-----h-----h-----h-----h-----h-----h-----h-----h-----h-----h-----h-----h-----

#map -----\*\*\*\*\*-----





```

Jnet 331001027 -----HHHHHHHHHHHH--HEE-----
P. excrementihominis -----ADSEEMKRFQAEYRPEFRK-----
W. succinogenes -----TEVSELRQYARQNPFLAK-----
L. pneumophila -----EVHHRLLSKQBPFLVK-----
S. wadsworthensis -----SDKMLLKLQNPDPFK-----
HTCC5015 -----NSVSKQRKMLASAEPIWAK-----
F. novicida -----RGIAEIRQLYEKVDSDIQAYAK-----
consensus/95% .....R.h.....h.....
consensus/85% .....R.h.....h.....

A. coleocanis -----SR-----
C. glomerans -----KC-----
Acidaminococcus D21 -----KS-----
V. atypica -----KV-----
F. nucleatum -----KV-----
F. allocis -----KS-----
S. moorei -----KF-----
C. catus -----KV-----
T. denticola -----KC-----
P. duerdenii -----KC-----
C. mitsuokai -----KN-----
S. thermophilus -----KV-----
S. mutans -----KV-----
S. pyogenes -----KV-----

```

```

domains
catalytic residues
domains
catalytic residues

```

```

B. bifidum -----HK-----
O. kitaharae -----KN-----
S. sanguinis -----K-----
F. fructosus -----K-----
E. yurii -----K-----
L. farciminis -----K-----
S. pseudintermedius -----K-----
L. rhamnosus -----KN-----
F. magna -----KS-----
P. antarcticus -----K-----
consensus/95% ..
consensus/85% ..

```

```

Jnet 227501312 -----SI-----
M. mobile -----SI-----
M. gallisepticum -----KK-----
M. synoviae -----EE-----
M. ovipneumoniae -----PE-----
M. canis -----KL-----
consensus/95% ..
consensus/85% ..

```

```

E. rectale -----KN-----
E. faecalis -----LD-----
S. thermophilus -----KT-----
S. lugdunensis -----KE-----
E. dolichum -----KD-----
R. albus -----EK-----
R. inulinivorans -----QK-----
L. coryniformis -----KV-----
I. polytropus -----KV-----
consensus/95% ..
consensus/85% ..

```

```

Bacteroides sp.20 -----DVWNKIVLPRPFRIL-----
I. album -----GVWKKDILRPFKRL-----
B. fragilis -----DV-----M-----
N. salusginis -----SK-----
E. minutum -----GL-----
S. globus -----GI-----
M. trichosporium -----WM-----
F. branchiophilum -----ES-----
Prevotella C561 -----SV-----
P. timonensis -----SE-----
P. timonensis -----SE-----
A. paucivorans -----KN-----
P. marinum -----SI-----
A. denitrificans -----DV-----
R. syzygii -----RV-----
D. shibae -----SL-----
R. rubrum -----TAARRFLDGLTPPLAKAVEGAVQ-----
Azospirillum B510 -----AI-----
C. salinarum -----HHAEDACLILLAGPA-----
N. hamburgensis -----GL-----
Bradyrhizobium BTA11 -----DL-----
W. succinogenes -----SK-----
C. jejuni -----AK-----
Jnet 218563121 -----EK-----
H. mustelae -----KV-----
A. ebreus -----KN-----
B. smithii -----KN-----
C. cellulolyticum -----KN-----
HF0070_07E19 -----NI-----
P. lavamentivorans -----KV-----
N. meningitidis -----KA-----
P. multocida -----KV-----
A. muciniphila -----KR-----
Actinomyces F0310 -----KR-----
A. cellulolyticus -----RL-----
B. longum -----GK-----
A. naeslundii -----SR-----

```

```

domains
catalytic residues

```

```

A. hesperidum -----KD-----
Alcanivorax W11-5 -----TVIPQVRFESG-MPVVDEEGAEI-----TPEEFKPRLQWEGHRVTREMRTDRR-----
B. zoohelcum -----DKFKLLKERY-BALLESEKPLEAEYDNVKKDFDSRKKYEKVEVLFEEQELTREEFIKEYKENYIRYKKNLILKGS-----
Porphyromonas F0450 -----KILHTMLDRY-DSMGTERV-----SREGATEELHITNWS-----
B. intestihominis -----TVLHDLNFDY-KKVGLETVIEV-----NHRGVSIRREIKDWS-----
O. laneus -----NILQSAPDITPPLPVSATENHREYVITNEQNEVIRLFPKQGETPRTKRGELLTGEVERKVFRCCKGMQEPQTDVSDGKYWRRIKLSSSVTWSPLFAPKPTISADQIVLKGRIEKGVFVNCQLKQKILKTGLPDGSSWISL-----
Treponema JC4 -----SIL-----CRKFTKEVALLGLK-----
Rhodovulum PH10 -----SIL-----SDSN-----
consensus/95% .....
consensus/85% .....

```

```

#map -----

```

Jnet 331001027  
P. excrementihominis  
W. succinogenes  
L. pneumophila  
S. wadsworthensis  
HTCC5015  
F. novicida  
consensus/95%  
consensus/85%  
  
A. coleocanis  
C. glomerans  
Acidaminococcus D21  
V. atypica  
F. nucleatum  
F. alocis  
S. moorei  
C. catus  
T. denticola  
P. duerdenii  
C. mitsuokai  
S. thermophilus  
S. mutans  
S. pyogenes

domains  
catalytic residues  
domains  
catalytic residues

B. bifidum  
O. kitaharae  
S. sanguinis  
F. fructosus  
E. yurii  
L. farciminis  
S. pseudintermedius  
L. rhamnosus  
F. magna  
P. antarcticus  
consensus/95%  
consensus/85%

Jnet 227501312  
M. mobile  
M. gallisepticum  
M. synoviae  
M. ovipneumoniae  
M. canis  
consensus/95%  
consensus/85%

E. rectale  
E. faecalis  
S. thermophilus  
S. lugdunensis  
E. dolichum  
R. albus  
R. inulinivorans  
L. coryniformis  
I. polytropus  
consensus/95%  
consensus/85%

Bacteroides sp.20  
I. album  
B. fragilis  
N. salisurginis  
E. minutum  
S. globus  
M. trichosporium  
F. branchiophilum  
Prevotella C561  
P. timonensis  
P. timonensis  
A. paucivorans  
P. marinum  
A. denitrificans  
R. syzygii  
D. shibae  
R. rubrum  
Azospirillum B510  
C. salinarum  
N. hamburgensis  
Bradyrhizobium BTA11  
W. succinogenes  
C. jejuni  
Jnet 218563121  
H. mustelae  
A. ebreus  
B. smithii  
C. cellulolyticum  
HF0070\_07E19  
P. lavamentivorans  
N. meningitidis  
P. multocida  
A. muciniphila  
Actinomyces F0310  
A. cellulolyticus  
B. longum  
A. naeslundii

domains  
catalytic residues

A. hesperidum  
Alcanivorax W11-5  
B. zoohelcum  
Porphyromonas F0450  
B. intestinhominis  
O. laneus  
Treponema JC4  
Rhodovulum PH10  
consensus/95%  
consensus/85%

#map







Jnet 331001027
P. excrementihominis
W. succinogenes
L. pneumophila
S. wadsworthensis
HTC5015
F. novicida
consensus/95%
consensus/85%
A. coleocanis
C. glomerans
Acidaminococcus D21
V. atypica
P. nucleatum
F. aloecis
S. moorei
C. catus
T. denticola
P. duerdenii
C. mitisuoakai
S. thermophilus
S. mutans
S. pyogenes

domains
catalytic residues
domains
catalytic residues

B. bifidum
O. kitaharae
S. sanguinis
F. fructosus
E. yurii
L. farcininis
S. pseudintermedius
L. rhamnosus
F. magna
P. antarcticus
consensus/95%
consensus/85%

Jnet 227501312
M. mobile
M. galeisepitum
M. synoviae
M. ovipneumoniae
M. canis
consensus/95%
consensus/85%

E. rectale
E. faecalis
S. thermophilus
S. lugdunensis
E. dolichum
R. albus
R. inulinivorans
L. coryniformis
I. polytropus
consensus/95%
consensus/85%

Bacteroides sp.20
I. album
N. fragilis
N. salusginis
E. minutum
S. globus
M. trichosporium
F. branchiophilum
Prevotella C561
P. timonensis
P. timonensis
A. paucivorans
P. marinum
A. denitrificans
R. syzygii
D. shibae
R. rubrum
Azospirillum B510
C. salinarum
N. hamburgensis
Bradyrhizobium BTA11
W. succinogenes
C. jejuni
Jnet 218563121
H. mustelae
A. ebreus
B. smithii
C. cellulolyticum
HF0070\_07E19
P. lavamentivorans
N. meningitidis
P. multocida
A. muciniphila
Actinomyces F0310
A. cellulolyticus
B. longum
A. naeslundii

domains
catalytic residues

A. hesperidum
Alcanivorax W11-5
B. zoohelium
Porphyromonas F0450
B. intestinhominis
O. laneus
Treponea Jc4
Rhodovulum PH10
consensus/95%
consensus/85%
#map





```
Jnet 331001027      ---EE-EEEE---EEEEEE---HHHHHHHHHH---
P. excrementihominis  --GTI--FFELVG--PRVIFNYIVGGAASLKEIFSEAGKER
W. succinogenes     --VKI--QLRDTGGISNIVVRKNADFTLSFRSEHIQLLK-
L. pneumophila     --GKM--KIVSTG--KIVTYEPEESDSTPQWIQTIVTQLKKQ
S. wadswoorthensis --SEI--PIENWGNARKHEFWIVVSSKKKMEISYRNWVYS
HTCC5015           --SNL--PLLETG--QKITFEVYANGAMAEVKKAYSLRRA-
F. novicida        --KVL--EILK---QSTIIEPESSGFNKTIKEMLGKLAGI
consensus/95%      .h.h.....h.....h.h.....
consensus/85%      .h.h...|.....h.....h.....

A. coelecanis      AMPEVIRRDGLGR--KRRFSYSGLPVSWQG-----
C. glomerans       NVHLI--DQSVTGM--FERRTKIGL-----
Acidaminococcus D21 D1RLV--EQSASGL--FVSKSQNLLEYL-----
V. atypica         EPKII--NESITGL--YSNEVTIV-----
F. nucleatum       NKNLLESVITGL--PVKIKL-----
F. aloccis         KIILV--NQSITGL--YENRREL-----
S. moorei          SVFVKIHSITGL--FEKEMDLLK-----
C. catus           KQISVINQSPTGI--YEKIDLILK-----
T. denticola       DNCILIVQSITGI--FEKIDLLK-----
P. duerdenii       KECKLINQSITGL--FENEVDLNL-----
C. mitsuokai       NNIVFISQSPITGI--YTKKYL-----
S. thermophilus    KDATLIHQSVITGL--YETRIDLAKLGE-----
S. mutans          LNATLIHQSVITGL--YETRIDLNLKLGSD-----
S. pyogenes        LDATLI|HSITGL--|RIDLSQLGSD-----

domains            ---EEEE---EEEE
catalytic residues  ccccccccccccccccccccccccccccccccccc|
domains            Pppppppppppppppppppppppppppppppppp|
catalytic residues Pppppppppppppppppppppppppppppppppp|

B. bifidum         DEDEFIQSPSGL--FEKRVTVGELKRKAKKVVNSKYRTNEK
O. kitaharae       DTDEFIQSVITGL--FSTQKTVAQLYQTK-----
S. sanguinis       LNATLIHQSVITGL--YETRIDLAKLGE-----
F. fructosus       DNSSEMIQSATGI--FETRVKIDSL-----
E. yurii           KEFKLIQSSITGL--YSCEKDLMTI-----
L. farciminis      NNDFIYQSITGL--YETRIHIE-----
S. pseudintermedius KDVKIAYTISISGLKTTPKPSLFLAESRNL-----
L. rhamnosus       KDQTIVQSPSGL--FKRIDPLADL-----
F. magna           DNTYLVYKSVITGI--YEKRIRIK-----
P. antarcticus     EEAIVGYESITGLKYRKPRSVVGTGR-----
consensus/95%      ...h...s.c|g|h.....h.....
consensus/85%      ...h...s.c|g|h.....h.....

Jnet 227501312    --EEEE---EEEE
M. mobile         --MKV--NLTYMGE--IFPK-----
M. gallisepticum   LLDADKNDFILGL--SKNRIDEILNKLGLDKIVK-----
M. synoviae        EYKIIHEVNPLGI--NLNWKKLENNN-----
M. ovipneumoniae  EYIPI--HDELGN--EYPVKIKEHTDDEKLMCTIK-----
M. canis           NYEQV--DISPFGI--NKKIFE-----
consensus/95%      .h.....h..|c.g.....
consensus/85%      .h.....h..|c.g.....

E. rectale        FIKKY--RYDILGN--KYSCSEKFTSFC-----
E. faecalis        KLRKF--NTDILGK--KHLYFYEKPKNLIK-----
S. thermophilus    SIYKV--RTDVLGN--QHILKNEGKPKLDF-----
S. lugdunensis     SIEKL--TTDVLGN--VFTNTQVTKPQLLFRGN-----
E. dolichum        RIDKY--ATDVVGN--LYVKKNTLKFEPD-----
R. albus           NGKGISCGEPLSL--LKEKN-----
R. inulinivorans   IFEKC--QVDILGN--ISVVRHENRQEPH-----
L. coryniformis    KFEKY--QVDYFGR--YHKVHEKRRQLFVKRDE-----
I. polytropus      NIKKY--QVDVLGN--VYKVKREKRSQTF-----
consensus/95%      .....-h|u.....
consensus/85%      .hc|h.....Dh|h.....

Bacteroides sp.20 ICFPI--KVDRILGN--IIQVSSCILTN-----
I. album           VCKKI--RVDRILGN--VREI-----
B. fragilis        TIVKV--RVNHIGQ--IVSVGEY-----
N. salusginis      RSVVEFGLTPEGSS--IENFKESGYSQVREDDPHI-----
E. minutum         NPKLI--ILSSCGF--IKVRSPILNKKEG-----
S. globus          DVKKV--QLSSAGL--VRYVSPILVDKIEKDEVALCGE-----
M. trichosporium   EPKFP--NVDRFGR--KHEVERELRTWRGETWRGKAYI-----
F. branchiophilum KMNHN--QTFVFGIDFKVLPKSG--FEKI-----
Prevotella C561    SVKSL--NFLIMGENRDFVIKN--GKIIFNHR-----
P. timonensis      SINNI--NILVDGI--DPTIDILGKVTLKE-----
P. timonensis      SINNI--NILVDGI--DPTIDILGKVTLKE-----
A. paucivorans     SMSKY--QVDLGE--IRLVGSEKPPFVL-----
P. marinum         SARKV--HISPTGL--IREG-----
A. denitrificans   KTRRV--TISPIGE--VRDPGPKG-----
R. syzgyii         GARRI--FVDLIGR--VLDGIGKD-----
D. shibae          GIRRV--SVDELGR--LRDGGTRPI-----
R. rubrum          KIRTT--SCTALGR--LRLSKKAT-----
Azospirillum B510 GARRV--TVDDLGR--VRVHAPGARVIGDAGRAMEPAEDI-----
C. salinarum       VAKGD--TVKPKGTYKVKV--ITQGIQMPVDAAGSAPRT-----
N. hamburgensis    AAVPV--RVDDELGR--VRRVMPH-----
Bradyrhizobium BTA11 NAEVL--RIDTLGQ--PWRKRGLQLETGSADATIGWTRPKKWP-----
W. succinogenes    DVKKY--QIDPLGY--YEVKQEKRLGTIPQRSALKLVK-----
C. jejuni          VPEKY--IVSALGE--VTKAEFRQREDFKK-----
Jnet 218563121    EEEEE--EEE-----EEE-----
H. mustelae       VFQKV--KLSVLGE--VLEHKPRNQIALKTTPKHV-----
A. ebreus          SVEKF--NVDVLGR--IYLAPPETRSGLA-----
B. smithii        RFEKY--QVDVLGN--IHKVGEKRVGLAAPTINQKGGTVDL-----
C. cellulolyticum  SIEKY--NVDILGN--KSIKVEPRRGMEKYSFKSN-----
HF0070_07E19      HFAKV--QVNLGK--VIK-----
P. lavamentivorans DAKKV--SIDPIGR--VRPSND-----
N. meningitidis    SPQKY--QIDELGK--EIRPCLLKRPPV-----
P. multocida       SFEKY--QVDELGK--NRQICRPQQRQVPR-----
A. muciniphila     NWRVVDLISLLK--YQMKRYPTSYSYTGTPR-----
Actinomyces F0310 GLIRVIRRNALGE--VRTSPKSGLPISLNL-----
A. cellulolyticus  GLTVI--RRTALGQ--PRWRGHLPSWRPWSADPWSSGPT-----
B. longum          AVRIV--RRNAFGE--FRLSSAHHMPCSQWRHE-----
A. naeslundii      HPTVV--RRDALGR--FRYSSRNLPSTWITTE-----

domains            ---EEE-----EE
catalytic residues  ccccccccccccccccccccccccccccccccccc|

A. hesperidum     VFEKY--VVGPLGD--THPVYKERMPFRVERKMN-----
Alcanivorax W11-5 KPADI--LSAKWGR--LKVGGRNHHLRLLCAE-----
B. zoohelcum       NCFKL--EIDRLGN--IVKVIK-----
Porphyromonas F0450 NIKKV--RVDLGR--ISLL-----
B. intestihominis NPHKV--HISVLGE--IKEIS-----
O. laneus          NPVKV--QIDEIGR--ITFLNGPLC-----
Treponema JC4      KARLV--TVSPIGR--VFRK-----
Rhodovulum PH10   GCYAV--RVDPIGV--VTLLRSNV-----
consensus/95%      .....|c.g.....
consensus/85%      ...h.h..|c.g.....

#map              ..*****
```

**Supplementary Figure S5. Multiple alignment of Cas1 sequences associated with type II CRISPR-Cas systems (Please see Supplementary Materials and Methods for details); Sequences are denoted by Genbank identifiers and complete organism name.**

```

16130662 Escherichia_coli_str_K-12_substr_MG1655 -----MTWLPNPIPLKDRVSMIFLQYGGQIDVIDGAFVLIDKT-----GIRT
11500011 Archaeoglobus_fulgidus_DSM_4304 -----MRK-----KNYYLVSDG-KLRRHENTLYFENE-----DGKR
18977490 Pyrococcus_furiosus_DSM_3638 -----MRK-----KSLTIFSDG-TLRRRENTLYFENV-----NGRK
46447796 Desulfotribrio_vulgaris_str_Hildenborough -----MKKLL-----NTLVVTTQGTYLAKEGECIVVRVGD-----EVRL
54296139 Legionella_pneumophila_str_Paris -----M-----KHLTLSEQGSFCKLQGERILVFNKD-----QMVF
331001028 Parasutterella_excrescentihominis_YIT_11859 -----M-----RHLTVSGGDFLGVHGNRLVFRNGD-----NVIL
319941582 Sutterella_wadsworthensis_3_1_45B -----M-----RVLTVSSFGTALGSLGERLUVVHEAD-----GRTW
118497353 Francisella_novicida_U112 -----M-----KHLIISEVYIYGLLESGRLVVRNK-----DKK
34557933 Wolinella_succinogenes_DSM_1740 -----MT-----KHLVIDEYGSFVGTSERLTVSQGG-----ELKA
187736488 Akkermansia_muciniphila_ATCC_BAA-835 -----MSY-----HILSIDAYTCHLSCDKQRCADGE-----NSPR
407803668 Alcaivorax_sp_W11-5 -----MSEQ-----HILLVESP-ALNTHLECLKVSRRG-----MEPL
325972002 Sphaerochaeta_globus_str_Buddy -----MW-----RVLDLGGTGYVLTVHNKLVKED-----GEES
187250661 Elusimicrobium_minutum_Pe1191 -----MW-----RVLDIPGDGYHLCKVKNNSFAVKDR-----EKKL
47458867 Mycoplasma_mobile_163K -----MGW-----KIVEINTDE-YVHVLNLLNVIKRR-----NEKI
363542551 Mycoplasma_ovipneumoniae_SC01 -----MK-----KIIIEISE-YVYFLNLLNVIKRD-----SEKF
71894593 Mycoplasma_synoviae_53 -----MMAK-----KVVEIKETE-YLFFHLNLSLVKKE-----NNKI
384393287 Mycoplasma_canis_PG_14 -----MSK-----KVLIEISQE-YISYFLNLSLVKSN-----EKRI
284931711 Mycoplasma_gallisepticum_str_F -----MQLPHPEHLCSGFLFMSK-----KVLVESETE-FISLHLDLTVVRKH-----GARV
117929157 Acidothermus_cellulolyticus_11B -----MTGPW-----RVVDLSELSGVEHAAQGALLVGD-----
317482065 Bifidobacterium_sp_12_1_47BFAA -----MQNQW-----RVLDLDCGSEIYERGRMRVVKNDT-----GECV
315605739 Actinomyces_sp_oral_taxon_180_str_F0310 -----MNSQW-----RVLDLDCGFEGLRSTRGGVEVCAQE-----TLPT
294086112 Candidatus_Punicispirillum_marinum_IMCC1322 -----M-----MTEISGQPRHISVRRGATVSDNE-----GLGT
282880053 Prevotella_timonensis_CRIS_5C-B1 -----MLK-----RSVVFSPHA-SLSLRKYNQLVITMKDLP-----DERR
374384762 Odoribacter_laneus_YIT_12061 -----MLK-----RTLFFGKPS-RVSLRDKQLVIEIKET-----GELH
423317188 Bergeyella_zooheicum_ATCC_43767 -----MLY-----RSIYIGNPA-YLKLKQDQMKLVCPETK-----AEKG
385811610 Ignavibacterium_album_YOM_16511 -----MLK-----RTLYFGNPA-YLSLRNAQQLVLRPEVKA-----KRNQ
402847305 Porphyromonas_sp_oral_taxon_279_str_F0450 -----MMK-----RTYIIGNPA-YLSLRKQMEVRQLDDRE-----TTVR
345885719 Prevotella_sp_C561 -----MIK-----KTYLYGNPA-YLSLRNQLVLRPEVKA-----LFDLIK-----QETIR
404487227 Barnesiella_inTestinohominis_YIT_11860 -----MIK-----RTLYFGNPS-YLSLRNAQQLVLRPEVSNNDTLPDTPK-----KEAER
301311870 Bacteroides_sp_20_3 -----MIK-----KTFYFGNPA-YLSLRNQLVLRPEVKNNDTVPESFK-----RQSEI
60683388 Bacteroides_fragilis_NCTC_9343 -----MIK-----KTYLYGNPV-YLSLRNAQQLVLRPEVKA-----LFDLIK-----QAEI
402849996 Rhodovulum_sp_PH10 -----MLG-----RIIEVEGEGRRCLERGFILITGPA-----GLLG
154250554 Parvibaculum_lavamentivorans_DS-1 -----MIR-----KTVEFATPGRLSVANKQLVIERPD-----LPKA
159042957 Dinoroseobacter_shibae_DFL_12 -----MD-----QIVDIATDGRHLSRDRGLVSEGA-----REIG
288957740 Azospirillum_sp_B510 -----MTG-----RIVEIAEDGRHLSRGLVVTAEAG-----RELJ
330822846 Alicyclophilus_denitrificans_K601 -----MITG-----RIVEIADDRHLSRDRGLVVTAEGER-----KELG
344171926 Ralstonia_syzygii_R24 -----MITG-----RIVEIATNNRYLGLDRGFVVKSDA-----EEVG
319957207 Nitratifactor_salsuginis_DSM_16511 -----MAAW-----KTRITKPC-RLSIENGNLVEDE-----KVRP
315149831 Enterococcus_faecalis_TX0012 -----MLLGF-----RTVFVKNGE-KLKVLDNLEVIKE-----GNTY
116627543 Streptococcus_thermophilus_LMD-9 -----MTW-----RVVHVQSSE-KMRLKLDNLLVQKM-----GQEF
238924076 Eubacterium_rectale_ATCC_33656 -----MAF-----RVLIIENEV-TIKVKLNLLITKC-----GEDI
218563120 Campylobacter_jejuni_subsp_jejuni_NCTC_11168_-ATCC_700819 -----MSYDEAF-----KTLIISSNA-KNLELNHLVIGQD-----ENIA
291276264 Helicobacter_mustelae_12198 -----MFDEAF-----RTLFMSPKA-KLSHKNNLLIHGK-----EDIG
325677757 Rumicoccus_albus_8 -----MW-----RVLVFKGE-KTLRKNLIVVYSD-----NNEQ
296446028 Methylosinus_trichosporium_QB3b -----MAW-----KGLHLSRPA-RLNPFSDNQVVAQD-----DGEA
34557789 Wolinella_succinogenes_DSM_1740 -----MAAW-----RTVVIATSC-HLRVDRQLVIESRE-----GERT
222109284 Acidovorax_ebreus_TPSY -----MVW-----RSIVINRPA-KLKRHFALVVEQE-----Q-SA
336393380 Lactobacillus_coryniformis_subsp_torquens_KCTC_3535 -----MAF-----RNLIYNPA-RLSISRSQVLVQEE-----ERY
218767587 Neisseria_meningitidis_22491 -----MTW-----RSLLIQNGK-KLSLQRKQLLQON-----GESH
15602991 Pasteurella_multocida_subsp_multocida_str_Pm70 -----MMSVVKIDKFDADLSDKNLCKVLYHPDFLYIGNRDFLGVMSW-----RSILISQGG-KLSLQRKQLVQOS-----NNSF
310780383 Ilyobacter_polytropus_DSM_2926 -----MGW-----RNIFITSS-TKSTRSDGLLITKE-----GGEV
312879014 Aminomonas_paucivorans_DSM_12260 -----MGW-----RSVFIANPA-RLSTGGRLVVEQE-----GEAA
403744859 Alicyclobacillus_hesperidum_URH17-3-68 -----MSH-----RHVMVTRSA-KLSCRNNQLVVRQDESSGE-----TCEY
421874296 Brevibacillus_laterosporus_GI-9 -----MW-----MSTRLNQLVVKQ-----EDEV
220930481 Clostridium_cellulolyticum_H10 -----MGW-----RNIIVSNPT-KLKLQNNLWVEQ-----SDGF
225377803 Roseburia_inulinivorans_DSM_16841 -----MGF-----RNIMISSNM-KLRIQDQLVVT-----GDEV
315659847 Staphylococcus_lugdunensis_M23590 -----MSW-----RIVVYSDVN-HMSLNLSLKIKKG-----DLET
160915783 Eubacterium_dolichum_DSM_3991 -----MGF-----RVLYIENQY-HLQYLDNLLKVEYS-----QGDI
323463802 Staphylococcus_pseudintermedius_ED99 -----MSF-----RTVITKES-KLSLRNQLVVKSE-----NLS
389815358 Planococcus_antarcticus_DSM_14505 -----MSW-----RTVILAKEA-KTLRPMGHLVSGE-----TVN
328956316 Coriobacterium_glomerans_PW2 -----MW-----RNVILSNA-KCTYQGGILVVRKE-----DDA
42284107 Streptococcus_sanguinis_SK49 -----MGW-----RTVVIWHS-KLSYKNNHLIFKDA-----SKTE
116628212 Streptococcus_thermophilus_LMD-9 -----MAGW-----RTVVVNIHS-KLSYKNNHLIFRNS-----YKTE
24379808 Streptococcus_mutans_UA159 -----MGW-----RTVVVNIHS-KLSYKNNHLIFKDA-----YQTE
13622194 Streptococcus_pyogenes_M1_GAS -----MAGW-----RTVVVNIHS-KLSYKNNHLIFKDA-----YKTE
227824982 Acidaminococcus_sp_D21 -----MSY-----RTVITQRC-KLDFCMNVEVQTA-----VSKK
169823756 Finegoldia_magna_ATCC_29328 -----MGW-----RTVLSGRA-KLDLKNLNLVIRK-----EIEV
320528779 Solobacterium_moorei_F0204 -----MGW-----RTVVISNTA-KLDYKMDYLVVRS-----NQVS
303229394 Veillonella_atypica_ACS-134-V-Col7a -----MSW-----RTVVISRS-KLDFKNNYMIIRK-----FETT
304438953 Peptoniphilus_duerdenii_ATCC_BAA-1640 -----MTW-----RVVVDNRA-KLELKLSHLVVRQD-----NKVQ
374307737 Filifactor_alocis_ATCC_35896 -----MSW-----REVITGHA-KLDYKMDYLVVRRQ-----DGTD
256845020 Fusobacterium_sp_3_1_36A2 -----MSGW-----RVVITGRS-KLDLRYNSISIRRD-----NGTD
306821690 Eubacterium_yurii_subsp_margaretiae_ATCC_43715 -----MSW-----RTIEISNA-KLDYQMGYVVRQ-----ESTT
42525844 Treponema_denticola_ATCC_35405 -----MSW-----RTVVISRA-KLDLHLNHLVVRG-----EKTQ
291520706 Coprococcus_catus_GD-7 -----MSW-----RIVVISRA-KLDLQLGRMVRSD-----EITK
258509198 Lactobacillus_rhamnosus_GG -----MGW-----RSFIITQHC-KVTTKQHSLLVQTN-----GEVY
336394883 Lactobacillus_farciminis_KCTC_3681 -----MGW-----RTYITQKA-KLSYKANHLIQTN-----MDIK
339625080 Fructobacillus_fructosus_KCTC_3544 -----MAW-----RTVVFNEHA-KINYPNDINIQTK-----EGGT
310286727 Bifidobacterium_bifidum_S17 -----MAW-----RNVVTRHC-KISTKMRLLVIQTD-----DDVC
366983954 Oenococcus_kitaharae_DSM_17330 -----MAW-----RNILINQHC-KISYKNNHLIQTQ-----TVH
#map of conserved positions used for tree reconstruction -----*****-----

```







294086112 Candidatus\_Punicispirillum\_marinum\_IMCC1322  
282880053 Prevotella\_timonensis\_CRIS\_5C-B1  
374384762 Odoribacter\_laneus\_YIT\_12061  
423317188 Bergeyella\_zooheicum\_ATCC\_43767  
385811610 Ignavibacterium\_album\_JCM\_16511  
402847305 Porphyromonas\_sp\_oral\_taxon\_279\_str\_F0450  
345885719 Prevotella\_sp\_C561  
404487227 Barnesiella\_intestinihominis\_YIT\_11860  
301311870 Bacteroides\_sp\_Z0\_3  
60683388 Bacteroides\_fragilis\_NCTC\_9343  
402849996 Rhodovulum\_sp\_PH10  
154250554 Parvibaculum\_lavamentivorans\_DS-1  
159042957 Dinoroseobacter\_shibae\_DFL\_12  
288957740 Azospirillum\_sp\_B510  
330822846 Alicyclophillus\_denitrificans\_K601  
344171926 Ralstonia\_syzgyii\_R24  
319957207 Nitratifactor\_salsuginis\_DSM\_16511  
315149831 Enterococcus\_faecalis\_TX0012  
116627543 Streptococcus\_thermophilus\_LMD-9  
238924076 Eubacterium\_rectale\_ATCC\_33656  
218563120 Campylobacter\_jejuni\_subsp\_jejuni\_NCTC\_11168\_-ATCC\_700819  
291276264 Helicobacter\_mustelae\_12198  
325677757 Ruminococcus\_albus\_8  
296446028 Methylosinus\_trichosporium\_OB3b  
34557789 Wolinella\_succinogenes\_DSM\_1740  
222109284 Acidovorax\_ahbreus\_TPSY  
336393380 Lactobacillus\_coryniformis\_subsp\_torquens\_KCTC\_3535  
218767587 Neisseria\_meningitidis\_22491  
15602991 Pasteurella\_multocida\_subsp\_multocida\_str\_Pm70  
310780383 Llyobacter\_polytropus\_DSM\_2926  
312879014 Aminomonas\_paucivorans\_DSM\_12260  
403744859 Alicyclobacillus\_hesperidum\_URH17-3-68  
421874296 Brevibacillus\_laterosporus\_GI-9  
220930481 Clostridium\_cellulolyticum\_H10  
225377803 Roseburia\_inulinivorans\_DSM\_16841  
315659847 Staphylococcus\_lugdunensis\_M23590  
160915783 Eubacterium\_dolichum\_DSM\_3991  
323463802 Staphylococcus\_pseudintermedius\_ED99  
389815358 Planococcus\_antarcticus\_DSM\_14505  
328956316 Coriobacterium\_glomerans\_PW2  
422884107 Streptococcus\_sanguinis\_SK49  
116628212 Streptococcus\_thermophilus\_LMD-9  
24379808 Streptococcus\_mutans\_DA159  
13622194 Streptococcus\_pyogenes\_M1\_GAS  
227824982 Acidaminococcus\_sp\_DZ1  
169823756 Finegoldia\_magna\_ATCC\_29328  
320528779 Solobacterium\_moorei\_F0204  
303229394 Veillonella\_atypica\_ACS-134-V-Col7a  
304438953 Peptoniphilus\_duerdenii\_ATCC\_BAA-1640  
374307737 Pilifactor\_alocis\_ATCC\_35896  
256845020 Fusobacterium\_sp\_3\_1\_36A2  
306821690 Eubacterium\_yurii\_subsp\_margaretiae\_ATCC\_43715  
42525844 Treponema\_denticola\_ATCC\_35405  
291520706 Coprococcus\_catus\_GD-7  
258509198 Lactobacillus\_rhamnosus\_GG  
336394883 Lactobacillus\_farciminis\_KCTC\_3681  
339625080 Fructobacillus\_fructosus\_KCTC\_3544  
310286727 Bifidobacterium\_bifidum\_S17  
366983954 Oenococcus\_kitaharae\_DSM\_17330  
#map of conserved positions used for tree reconstruction

DQ-----AVVGATSPFLQHMSSQLSYSLWENLDGQKT---TMPMPQLIPELETEAMVSEC-----  
DT-----YFINVTRPLSVGLTMTMASLVKYYAKEVK---KISLPLLK-----  
DT-----YFENTTRPLMVGLSQTMTASLARCFSGEQK---KMYVPEFK-----  
DV-----KIDQVRPLLVAVKSTVSSLYKCYTGEKR---QISYPKML-----  
DV-----FIEEQKRPLMIAVQRTTSSLAKCFNSGNQR---KIIYVPFKL-----  
DV-----ETEGQRKPLMLAATQATSLLRCTFGEAR---RLAYPLLSCEPSA-----  
DV-----VIGGKRSPLMIAAGLTASLAKCYNGEAR---EISYSPFL-----  
EV-----GIQGRRSPLMVAVAGTTASLKYCFNGELR---KIIYPEL-----  
EV-----KIGGKRSPLMIAVAGTTASLKYCFNGEQR---RIVYPER-----  
EV-----IIGGKRSPLMVAVAGTTASLKYCFNGELR---RISYPER-----  
DF-----ATSDGRTPSLNVLARLAVSLAQVFTERR---GLAFPELTVPLPTAEDDGSANETAHVAVGVSDDL  
TV-----LVGGRMPLMLLALHASAASLCRALTGGEA---ALALPEGMPLAPDLLDNDGEG-----  
DL-----PLGDSLTPVSVVALGKLAISLQGSFESGTL---DLALPAPFDALTLAGLGA-----  
DM-----LTAQGTTPIGTVLIRLAGSLAQVVEEGKG---DLDLPALDRFPWAMPLEWPAAPPAGGETGC-----  
DM-----QTSVGVTPVMVCMQKLAISLAQVYLGERT---KLDLPLQGLPLALAGSSESD-----  
DM-----PSPQGITPVMGAVQRLCTSLAQVYLGERK---ELELPLCPTPFDLAAMFVPLA-----  
EYL-----IYDAGRSTLRVATRYIQGFKAVVRSRKI---ENLHFPTIDFGALRECF-----  
KI-----KVNKKIYMQAMSEYVAAFVKAMETGDF---ENQVKIHLVNMLECEGK-----  
KI-----KYGKETCSVTVMADKVVKGFYIKYISEKDS---SKFPCVVSLSLEWRK-----  
KI-----MYREKKMYMCMNIENYIQEYASLIMKRTD---NIVFPDVYVNLIGEEYG-----  
KI-----NFDGQNYPLNRAINHVNANFKNALLYEDE---LKIVKFD-----  
KV-----LLQGGKFPFHRSITRMVWSISNFIICDRGK---MIEPLLDKESNGREVVYESFSDV-----  
KV-----KMGKKTRVRYAIDKYISSLTSALERKNDP---GLLQLPTLIQIDEMFEDDEDG-----  
NA-----RVGKEIVSLVAASEKAAEGLVQAMESGSA---AIIKLPFFVTPKGSPP-----  
SC-----IMTERYETLLSATQIARSLSVAGEQKES---RRLI-LPFWGEDDVGQEVVEADGDV-----  
DV-----AMPFGQMSVLASIEQAESLARLVDGGSE---QVLELPLRILGLRQHVFEI-----  
EV-----RIDGEPHLSLNAHVKLSVYTCRCRNISA---AGLKLPELPLVAHEYE-----  
QT-----SIEQHFHSTLAAIDKMISSFOAGVTDKNA---KQIKLPELPLKHEQYQE-----  
QM-----SFOEETFSLAAIDRTVGSFOAALTTPNA---NLLKLPPELPLKHEQYQE-----  
DV-----KLTGKKYSVNIISIDEVITKTKIRGKGG---NLLKLPPELPLKHEQYQE-----  
RM-----EQGERHTILRGTLECAEFPAAACREKNP---DLALPALISPDG-----  
MV-----WLEGERYDLTASIEAMVSSFNASTEDP---SALQLPRLTEVQMGVVE-----  
QV-----ELEGERYSCNRAIEEMIKSVVTACTRSMY---ERLRLPTLLPKIHSYE-----  
EC-----VFEKGIISIRSAIEKVISSPSSCAKNRY---SLKLPPELPLKHEQYQE-----  
DM-----SVKGDMRVNSCIDMLIASYSSALQGNRT---ELDLPELPLKHEQYQE-----  
RI-----EIDGKMQTIRAEIIMQSIIEYFKNGHL---DIVKFPNLRKYQHYEL-----  
KI-----EIDGKMQTIRAEIIMQSIIEYFKNGHL---DIVKFPNLRKYQHYEL-----  
KL-----KIDNKKYFPLNAVEIYVDSLFKYLNGNR---EVKIPPTWY-----  
KV-----QIRNSKQFLQAAVQVYVDSLQYLNDGKH---EKLFPPLDFPKAR-----  
CI-----AYRGTYKTSVSIISLVQDCLNALNKRLA---IDEIDPFDIV-----  
TF-----HYNGKDMYLSNIVSDYTKKVIKALNQLGE---EIPPEFRI-----  
TY-----LYNGKEMYLSNIVSDYTKKVIKALNQLGE---EIPPEFRI-----  
TF-----SYNGKEMYLSNIVSDYTKKVIKALNQLGE---EIPPEFRI-----  
IL-----YIDDSQFLANAIMYVANSIFQALEKDT---SKTKIYEL-----  
EV-----FIGKTRVTLNANVNEYCKSVFLALEKGE---QLIKPDIYEL-----  
KV-----SIMGREQYMLNAIEIYVKSILDAISSEN---SLIKFVVEEFTCYESDSVL-----  
DV-----KINDTQTFSAAVR1YCKSVFDALRVQAA---NEIRIFIEYEL-----  
FV-----TIDNKYCRINQALEIYIRSVFDALNDRD1---SLRFPYSYEL-----  
EV-----RIDSKSVYVNAIKLYCKSIFEALHYEDT---SYIKFYTNEL-----  
KF-----RINNVNHYLSDIIEIKYTKSIFDALSANL1---SLVRFEEDEL-----  
SV-----IINGRTEVLTNAVYIYCKSIFDALQKDI1---SLIRFYENEF-----  
KV-----LNNKHEHYLNKAIIEYVHSIFDALNEKDI1---SQINFYRNEF-----  
EV-----RIDGKQVYVNAIKLYCKSVFDALSEDD3---ALIRFYKIEL-----  
EI-----TFNGKQALLQNAVADHVENCLAFLDGKAKVCR1EVKFPDEVSSHAINDHV-----  
EI-----SYGSKTFLKNAISQYIRDCIYSLDSNQE---VEIKKVGFKDEE-----  
EI-----TMNSKRYELAAQVQKHVQELKYLCSDDS---ELPEMDFEL-----  
D-----VPELGTITQLISVFRDALRYLSGEEC---LPELGFVRCGTLECE-----  
EV-----GYLQHQATVNSAIEYVRNALDYLCGKRP---EVAVSVAI-----  
\*\*\*\*\*

# Cas1

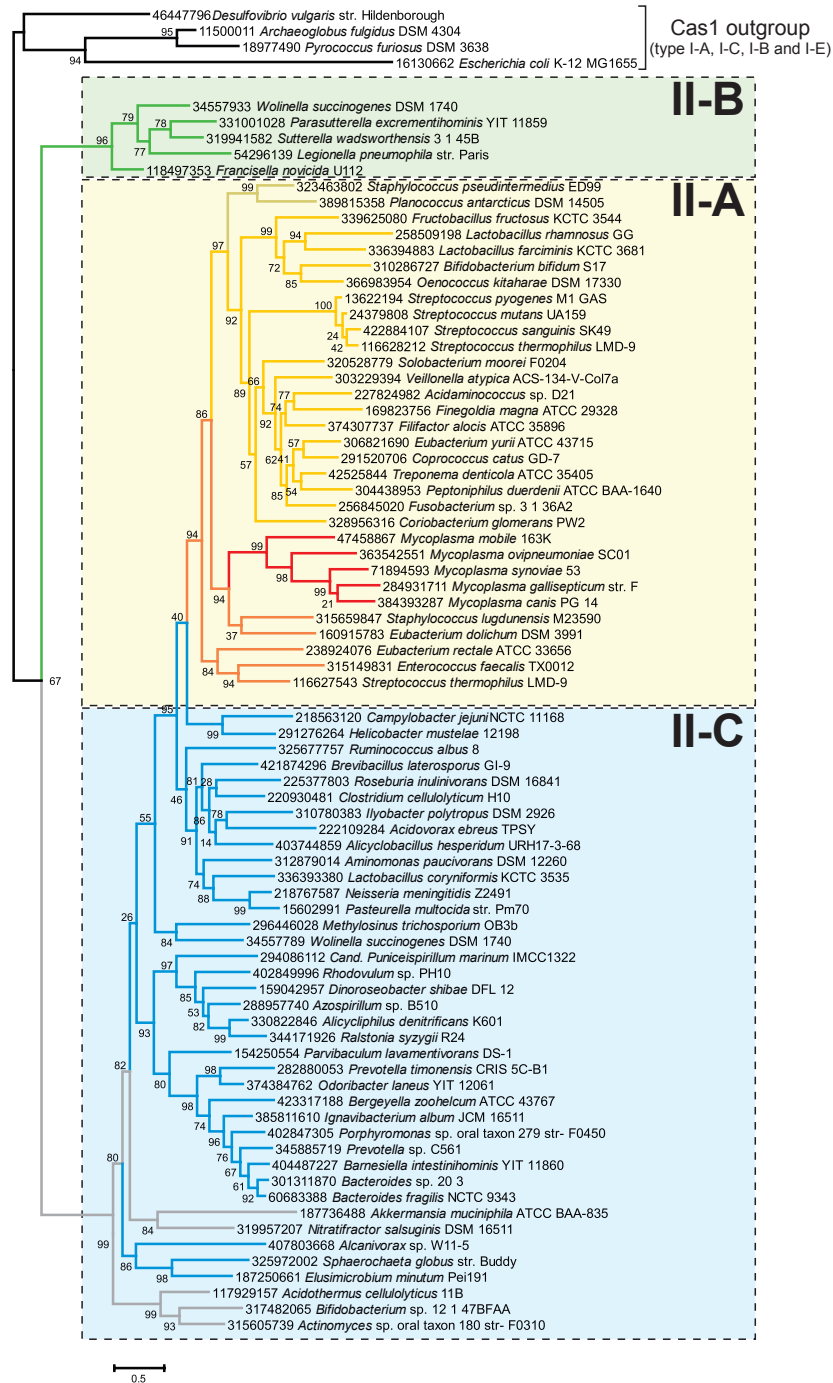

**Supplementary Figure S6. Phylogenetic tree of representative Cas1 sequences.** The tree was reconstructed from selected, informative positions of the Cas1 multiple sequence alignment (see Supplementary Figure S5 and Supplementary Materials and Methods), and was rooted to selected Cas1 orthologs of the type I CRISPR-Cas outgroup. Shaded boxes group Cas1 sequences associated with three major type II CRISPR-Cas subtypes. Colored branches indicate the CRISPR-Cas loci with similar architecture. Compare with Figure 4. Note the similar topology of Cas1 and Cas9 trees (Figure 4).

**Supplementary Figure S7. Analysis of Csn2 orthologs.** (A) Complete multiple sequence alignment of selected Csn2 orthologs and selected ATPases. See Figure 5. Underlined, regions of homology with short Csn2 ortholog according to HHPRED. (B) HHPRED hits for selected Csn2 orthologs representative of five families. See Figure 5. (C) Selected proteins with structures similar to long and short Csn2 structures (3zth and 3toc) according to PDBe and their structural alignment with long and short Csn2 representatives (3toc and 3zth). Walker A, Walker B and signature motifs are highlighted in boxes. See Figure 5 and Supplementary Materials and Methods.







**B**

**HHPRED hits for Csn2 long**

| No | Hit                             | Probab | E-value | P-value | Score | SS   | Cols | Query HMM | Template HMM  |
|----|---------------------------------|--------|---------|---------|-------|------|------|-----------|---------------|
| 1  | 4199_A Chromosome partition pr  | 95.0   | 2.5     | 1.7E-05 | 43.4  | 14.0 | 230  | 2-245     | 1-305 (354)   |
| 2  | glxew.1 c.37.1.12 (X:,Y:) Smc   | 94.6   | 3.1     | 2.1E-05 | 42.3  | 13.3 | 219  | 4-236     | 6-278 (329)   |
| 3  | 3auy_A DNA double-strand break  | 81.5   | 8.8     | 5.9E-05 | 37.8  | 4.9  | 66   | 1-67      | 4-72 (371)    |
| 4  | 4ad8_A DNA repair protein REC N | 76.4   | 18      | 0.00012 | 40.1  | 5.9  | 47   | 1-48      | 39-88 (517)   |
| 5  | 4aby_A DNA repair protein REC N | 75.0   | 21      | 0.00014 | 38.5  | 5.7  | 46   | 1-47      | 39-87 (415)   |
| 6  | 3kta_B Chromosome segregation   | 73.2   | 71      | 0.00048 | 32.3  | 8.4  | 115  | 113-242   | 9-123 (173)   |
| 7  | glf2T.1 c.37.1.12 (A:;B:) Rad5  | 72.6   | 1.1E+02 | 0.00074 | 30.8  | 9.4  | 216  | 13-244    | 15-263 (292)  |
| 8  | d2za4b c.9.1.1 (B:) automatod   | 72.3   | 70      | 0.00047 | 29.0  | 7.3  | 62   | 175-243   | 26-89 (90)    |
| 9  | 2fnaA01                         | 71.5   | 60      | 0.0004  | 31.6  | 7.3  | 87   | 161-249   | 95-181 (208)  |
| 10 | d1e69a c.37.1.12 (A:) Smc hea   | 70.9   | 13      | 8.7E-05 | 37.8  | 3.1  | 47   | 4-51      | 5-55 (308)    |
| 11 | PF02463 SMC N: RecF/RecN/GMC    | 69.4   | 23      | 0.00016 | 35.2  | 4.4  | 46   | 1-47      | 1-51 (220)    |
| 12 | d2hxxa c.9.1.1 (A:) automatod   | 69.3   | 1.1E+02 | 0.00073 | 27.8  | 7.8  | 52   | 191-243   | 34-88 (89)    |
| 13 | PF13304 AAA_21: AAA domain; P   | 68.1   | 1.6E+02 | 0.0011  | 27.9  | 9.0  | 215  | 22-244    | 1-295 (303)   |
| 14 | lwlw_A Structural maintenance   | 67.3   | 1.3E+02 | 0.00086 | 31.5  | 8.9  | 124  | 113-244   | 269-393 (430) |
| 15 | 3zgx_A SMC, chromosome partiti  | 66.5   | 20      | 0.00014 | 36.5  | 3.4  | 44   | 4-48      | 5-52 (426)    |

No 1

>4199\_A Chromosome partition protein SMC; winged-helix domain and SMC head domain, chromosome condensa SCPB, DNA binding protein; 2.30A (Pyrococcus furiosus)

Probab=95.02 E-value=2.5 Score=43.40 Aligned\_cols=230 Identities=11% Similarity=0.085 Sum\_probs=0.0

```

Q ss_pred ce-----EEEEeccc-----EEEeccc-eEEEeCcHHHHHHHHHHHHHCCCCcCHHHhh-----
Q gi|365905381|r 1 -M---RLKIEIDDQSF---FELDFGD-IVYISGYNQNMWKIYRSLYYFNKSPM--LSTN----- 51 (340)
Q Consensus 2 mM---l-i-h-----ie---g---tqi-G-N-qlK-yi-q-L--yF-gkkyse-e----- 55 (365)
| | ++++ . |+ . + ++++++ +|. +|. | -|=| +++++|. |+|. | . . . . .
T Consensus 1 m-yI--i-I~NFksf-----i-f~---inviI-G-NgSGKSnIeAI~l~-----r~-----d-i~----- 79 (354)
T 4199_A 1 MPYIEKLELK-GFKSYGNKKVVIPFSGKFTAIVGANGSGKSNIGDAILFVLGGLSAKAMRASRISDLIFAGSKNEPPAKY 79 (354)
T ss_dssp -CEEEEEEEE-SBGGGCSCEEEECSSSEEEECCTTSSHHHHHHHHHHHTCCCTGGTCCSSGGGBCCCSSCCSSCCSCC
T ss_pred CCcCEEEEEE-CcccccCEEEECCEEEECCEEEECCHHHHHHHHHHHHCCcCchhhccccchHHhccccCCcCce

```

```

Q ss_pred -----hccccEEecCccccCcc-----ceEEEEcCHHHHHH-----
Q gi|365905381|r 52 -----TYGDDNIEISLDVSP-STK-----NTQTYFISNRDSIYQ----- 85 (340)
Q Consensus 56 -----if---ep-I~d~v~l~rk-----i---I-s~di~e----- 90 (365)
+ . + . + . + . + + + | + . + . + + + . + + . + . + . + . . + . + . + .
T Consensus 80 ~i~-----i~-----g~-----i~-----i~-----i~-----i~----- 158 (354)
T 4199_A 80 AEVAIYFNNEDRGFFIDEDEVVIRRRVYDGRSSYWLNRRRA-TRSEILDILTAAAMISPDGYNIQLQGDITKFKIMSPLE 158 (354)
T ss_dssp EEEEEEEECTCCSSSSSSSEEEEEECTTSCEEEEEETTEE-CHHHHHHHHHHTCCTTCTTTEECTTHHHHHHCHHHH
T ss_pred EEEEEEccccccCccccceEEEEEEEcCCcEEEEECce-eHHHHHHHHHHHCCcCceEBEEccccchhhhhcCHH

```

```

Q ss_pred ---HHHhccccCHHHHHHHHHHHHHHHHHHHHHHHHHHHHChHHHHhhCcEEehhccccchHHHHHHhhccc
Q gi|365905381|r 86 ---QMiyKGNLLFENLNTLNDSPFETRILEELNDTNTKLSLLVQ--EHNNYANNLLIDFEDV--TYFD--VLKYFLKV 156 (340)
Q Consensus 91 ---qgm~krGTll~yL~-----dI~le~iNd~l~-----iN~-----i~-----e~-----ll-k~----- 167 (365)
+ . . . . . + . . . . . + . . . . . + . . . . . + . . . . . + . . . . . + . . . . .
T Consensus 159 ~-----i~-----g~-----i~-----i~-----i~-----i~-----i~----- 231 (354)
T 4199_A 159 RRLLLDDISGIAEYDSKKEKALEE-EKEKKNVFMRTFEASIRNFS--EIFAKLSPGGSARLILE--NPED--PFGGLEI 231 (354)
T ss_dssp HHHHHHHHTC-----CCHHHHHHHHHHHHHHHHH--HHHHHTTCEEEEEES--STTS--GGGCSEEE
T ss_pred hhhhhccccchHHHHHHHHHH--HHHHhhhhhhhhhhHHHH--HHhhhhcCCceeeee--cccc--cccceeeE

```

```

Q ss_pred ccccCcee-cccchHHHHHHHHHHHHHHHHHHHCCcCEEEECChHHHHhccCHHHHHHHHHHHhCCCCEEEEEC
Q gi|365905381|r 157 SYEDSNRTF-PLEFMETESLVDELNLNLISSLKKANNDTWIVLYNLDSFVSRSAKTKILNKLKFTDRF-ELKVIYLG 232 (340)
Q Consensus 168 ~-----le-v~-----L-ll~l~-----lVlknId-fls~s~s~i~-----l~lt-k~-----iif- 245 (365)
+ . . . . . + . . . . . + . . . . . + . . . . . + . . . . . + . . . . . + . . . . .
T Consensus 232 ~-----s-g~-----l~-----l~-----i~-----liDEpe~Lhp~-----l~-----L~-----v~-----qviit 305 (354)
T 4199_A 232 EAKPAGKDVKRIEAMSGEAKLTALAFVFAIQKFKPAP-FYLFDEIDAHLDDA-NVKRVADLIKSS--KESQFIVIT 305 (354)
T ss_dssp EESSSSSSCCCGGGSCHHHHHHHHHHHHHHHHHHSCCS-EEEESTTTTCHH-HHHHHHHHHHHH--TTSEEEEEEC
T ss_pred EccccccccccccchHHHHHHHHHHHHHHHhCCc-hhhccCHhhcCHH-HHHHHHHHHHHc---CCeEEEE

```

No 2

>glxew.1 c.37.1.12 (X:,Y:) Smc head domain (Pyrococcus furiosus [TaxId: 2261])

Probab=94.58 E-value=3.1 Score=42.31 Aligned\_cols=219 Identities=12% Similarity=0.084 Sum\_probs=0.0

```

Q ss_pred EEEEEecccce---EEEeccc-eEEEeCcHHHHHHHHHHHHHCCCCc-----
Q gi|365905381|r 2 RLKIEIDDQSF---FELDFGD-IVYISGYNQNMWKIYRSLYYFNKSPM----- 47 (340)
Q Consensus 4 ~l-i-h-----ie---g---tqi-G-N-qlK-yi-q-L--yF-gkkyse-e----- 50 (365)
+++++ . |+ . + ++++++ +|. +|. | -|=| +++++|. |+|. | . . . . .
T Consensus 6 ~i-i~NFks-----l-f~---lvi-G-NgSGKS~i~AI~---L~-----r~-----i~----- 84 (329)
T glxew.1 6 KLELK-GFKSYGNKKVVIPFSGKFTAIVGANGSGKSNIGDAILFVLGGLSAKAMRASRISDLIFAGSKNEPPAKYAEVAI 84 (329)
T ss_dssp EEEEBE-SBTBCESEEEECSSSEEEECCTTSSHHHHHHHHHHTTSCCCC-----CSEEEEE
T ss_pred EEEEE-CeEcccCCEEEECCEEEECCEEEECCHHHHHHHHHHHCCcCchhhccccchhhhhccccccccchhhhh

```

```

Q ss_pred -----HHHHhhcCCEEEcCccCccceEEEE---ccHHHHHHHH-----hccccHHHHHHHHhh
Q gi|365905381|r 48 -----LSTNIYGDDNIEISLDVSP-STKNQTYFI---SNRDSIYQMI-----YKGNLFLFENLNTLNDSP 105 (340)
Q Consensus 51 -----e-e~if---ep-I~d~v~l~rk-----i-I-s~di~egm-----krGTll~yL~----- 110 (365)
+ . . . . . + . . . . . + . . . . . + . . . . . + . . . . . + . . . . . + . . . . .
T Consensus 85 ~-----i~-----g~-----i~-----i~-----i~-----i~-----i~----- 159 (329)
T glxew.1 85 YFNNEDRGFFIDEDE---EVVIRRRV-YDGRSSYWLNRRRTRSEILDILTAAAMISPDGYNIQLQGDITKFKIMSPLE 159 (329)
T ss_dssp EEEECTCCSSSSSS---EEEEEEEC-CCTSCCEEEETTEECHHHHHHHHHHTCCTTCTTEECTTHHHHHHCHHHH
T ss_pred hhhhhccccCcccC---cccEEEEE-ecCCEEEECcECCcEchHHHHHHHHhCCcCceEEehhhhhcchcchh

```

```

Q ss_pred HHHHHHHHHHHHHHHHHHHHHChHHHHhhCcEEehhccccchHHHHHHhccccccCCEe-cccchHHHHHH
Q gi|365905381|r 106 FEITRIILELNDTNTKLSLLVQ--EHNNYANNLLIDFEDV--TYFD--VLKYFLKVSIEDSNRTF-PLEFMETESLVDE 178 (340)
Q Consensus 111 ~dI~le~iNd~l~-----iN~-----i~-----i~-----e~-----ll-k~-----le-v~----- 189 (365)
+ . . . . . + . . . . . + . . . . . + . . . . . + . . . . . + . . . . . + . . . . .
T Consensus 160 ~-----i~-----g~-----i~-----i~-----i~-----i~-----i~----- 233 (329)
T glxew.1 160 RLLLDLISVFMRTFEASIRNFS-EIFAKLSPGGSARLILE--NPED--PFGGLEIEAKPAGKDVKRIEAMSGEAKLT 233 (329)
T ss_dssp HHHHHHCHHHHHHHHHHHH--HHHHHTTCEEEEEES--CSSS--GGGSEEEEECTTSCCEEGGGSCHHHHHH
T ss_pred hhhhhccccchhhhhhhhhhh--hhheecCCcEEEEcc--CCcc--ccccCceEEEECCCCceehhhhhHHHHHH

```

```

Q ss_pred HHHHHHHHHHHcCCEEEEEChHHHHhccCHHHHHHHHHHHHHHHCC
Q gi|365905381|r 179 LLNLISSLKKANNDTWIVLYNLDSFVSRSAKTKILNKLKFTDRF 224 (340)
Q Consensus 190 ~l~l~l~-----lVlknId-fls~s~s~i~-----l~lt-k~ 236 (365)
+ . . . . . + . . . . . + . . . . . + . . . . . + . . . . . + . . . . . + . . . . .
T Consensus 234 ~l~-----i~-----e~-----l~-----i~-----i~----- 278 (329)
T glxew.1 234 ALAFVFAIQKFK-PAPFYLFDEIDAHLDDA-NVKRVADLIKSSKES 278 (329)
T ss_dssp HHHHHHHHHHS-CSEEEESTTTTSCCHH-HHHHHHHHHHHTTTS
T ss_pred HHHHHHHHHhcc-ccccchhhhhHHhhcCHH-HHHHHHHHHHHhccC

```







# HHPRED hits for Csn2 Mycoplasma

| No Hit                          | Prob | E-value | P-value | Score | SS Cols | Query HMM | Template HMM  |
|---------------------------------|------|---------|---------|-------|---------|-----------|---------------|
| 1 PIRSF037215 Peptidase_T       | 21.0 | 2.9E+02 | 0.002   | 31.2  | 3.1 33  | 90-122    | 293-325 (419) |
| 2 PF07693 KAP_NTPase: KAP famil | 17.6 | 1.8E+03 | 0.012   | 22.8  | 7.1 81  | 143-237   | 157-246 (325) |

## No 9

>PIRSF037215 Peptidase\_T  
 Probab=20.96 E-value=2.9e+02 Score=31.18 Aligned\_cols=33 Identities=15% Similarity=0.278 Sum\_probs=0.0

Q ss\_pred cchHhhhhhhHHHHHHHHHHHHhhcchheecc  
 Q gi|350546883|r 83 -IETNKILGNDKI-HNIKEYINISKIGFDVIEEK 113 (250)  
 Q Consensus 90 ~~~~dki~~~~i~~~I~~~iN~kiGfdfv~~e 122 (265)  
 T Consensus 293 DfD~~~F~~rK~~~~~v~~~n~~g~~~~e 325 (419)  
 T PIRSF037215 293 DFDRDGFPEARKELIKEIVDKLNKYGRARIKLE 325 (419)  
 T ss\_pred CCCHHHHHHHHHHHHHHHHHhhCCCCeEEEE

## No 10

>PF07693 KAP\_NTPase: KAP family P-loop domain; InterPro: IPR011646 The KAP (after Kidins220/ARMS and PifA) family of predicted NTPases are sporadically distributed across a wide phylogenetic range in bacteria and in animals. Many of the prokaryotic KAP NTPases are encoded in plasmids and tend to undergo disruption to form pseudogenes. A unique feature of all eukaryotic and certain bacterial KAP NTPases is the presence of two or four transmembrane helices inserted into the P-loop NTPase domain. These transmembrane helices anchor KAP NTPases in the membrane such that the P-loop domain is located on the intracellular side [].  
 Probab=17.57 E-value=1.8e+03 Score=22.80 Aligned\_cols=81 Identities=16% Similarity=0.138 Sum\_probs=0.0

Q ss\_pred HHHHHHHHHhhccccceEEEEecCCcccHHHHHHhhc-----ceeEEEEcCCHHHHHhhHHHHHHhhcCCcc  
 Q gi|350546883|r 134 KNIFISLIKNNLFD-ERMTEVFCDDIDLWLNINDISEYIN-----SHNFIFVTND-LRKNIVNITQIESVCICND--- 199 (250)  
 Q Consensus 143 ~~~~~s~len~~~~~e~~~~vILKd~d~I~i~~L~e~~n-----n~IiltNd~~~~~i~~f~~iE~~~f~~~~~ 213 (265)  
 T Consensus 157 ~~~~~l~~~~~l~~~~~iViiDdLDR~~~~~i~~~~l~~~~ik~~~~~i~~~~i~~I~~D~~~~l~~~~ai~~~~~ 228 (325)  
 T PF07693\_consen 157 EELISKIKKKLKESSKRRIVIIIDDLRCSPEEIVELLEAIKLLDFPNIIFILAFDP--EILEKAIEKNYGGF----- 228 (325)  
 T ss\_pred HHHHHHHHHhhcCCceEEEEecchhcCCcHHHHHHHHHHhhcCCCCeEEEEecH--HHHHHHHHhhcCccc-----

Q ss\_pred eEEEEcchHHHHHHHHhhCccc  
 Q gi|350546883|r 200 FLVEIYDYNKLISYLELKMMNTLIN 223 (250)  
 Q Consensus 214 ~iv~I~n~~~~~y~lE~~~~~i~  
 T Consensus 229 ~~~~~~yLeKiIq~~~~ 246 (325)  
 T PF07693\_consen 229 -----DEIDGREYLEKIIQVFPFS 246 (325)  
 T ss\_pred -----ccccHHHHHHhhcCeEEEE





No 7

>i499\_A Chromosome partition protein SMC; winged-helix domain and SMC head domain, chromosome condensa SCPB, DNA binding protein; 2.30A (Pyrococcus furiosus)
Probab=84.00 E-value=4.2 Score=38.51 Aligned\_cols=35 Identities=23% Similarity=0.264 Sum\_probs=0.0

Q ss\_pred ccCCCCHHHHHHHHHhC---CCeEEECcChhHHH
Q gi|315659845|r 189 PEANLSPKEQIRLKQLLISL--DVNIIIVLTGSMHFLA 223 (333)
Q Consensus 201 PEANLs~KEqir~r~l~L---i~iVLT~S~FLA 235 (345)
T Consensus 276 pe~~Lhp~~~~~l~~~~L~~~~~QviitTHsp~l~ 312 (354)
T 4i99\_A 276 IDAHLDDANVKRVADLIKESSESQFIVITLDRVMMVA 312 (354)
T ss\_dssp TTTTCCHHHHHHHHHHHHHHTTSEEEECcCHHHHT
T ss\_pred HhhhcCHHHHHHHHHHHHHCCcEEEEECcHHHHH

No 8

>glf2t.1 c.37.1.12 (A;B:) Rad50 {Archaeon Pyrococcus furiosus [TaxId: 2261]}
Probab=82.01 E-value=6.5 Score=35.39 Aligned\_cols=35 Identities=11% Similarity=0.217 Sum\_probs=0.0

Q ss\_pred ccCCCCHHHHHHHHHhC---CCeEEECcChhHHH
Q gi|315659845|r 189 PEANLSPKEQIRLKQLLISL---VNIIIVLTGSMHFLA 223 (333)
Q Consensus 201 PEANLs~KEqir~r~l~L---i~iVLT~S~FLA 235 (345)
T Consensus 234 p~~~Id~~~~~l~~~~L~~~~~qvi~v~TH~~~~~ 271 (292)
T glf2t.1 234 PTPYLDEERRRKLITIMERYLKPIQVILVSHDEELKD 271 (292)
T ss\_dssp CSTTCHHHHHHHHHHHHHTGGSSSEEEECcGGGGG
T ss\_pred CcccCHHHHHHHHHHHHHHhCCcEEEEECcHHHHH

No 9

>SUFFAM0046693 c.37.1 P-loop containing nucleoside triphosphate hydrolases (52540) SCOP seed sequence: dif2t.1.
Probab=80.50 E-value=8.3 Score=30.15 Aligned\_cols=34 Identities=35% Similarity=0.573 Sum\_probs=0.0

Q ss\_pred ccCCCCHHHHHHHHHhC---CCeEEECcChhHHH
Q gi|315659845|r 189 PEANLSPKEQIRLKQLLISL--DVNIIIVLTGSMHFL 222 (333)
Q Consensus 201 PEANLs~KEqir~r~l~L---i~iVLT~S~FL 234 (345)
T Consensus 235 p~~~LD~~~~~l~~~~L~~~~~H~~~~~ 271 (293)
T SUPFAM0046693 235 PTAGLDPETRELELLELLAKEKGTIVVTHDLELL 271 (293)
T ss\_pred CcccCHHHHHHHHHHHHHHhCCcEEEEECcHHHHH

No 10

>dle69a c.37.1.12 (A:) Smc head domain {Thermotoga maritima [TaxId: 2336]}
Probab=79.78 E-value=33 Score=32.35 Aligned\_cols=60 Identities=17% Similarity=0.143 Sum\_probs=0.0

Q ss\_pred HHHHHHHHHHHHhCCEEEEEccCCHHHHHHHHHH---hCCCCeEEECcChhHHH
Q gi|315659845|r 164 EQVLPVIEELKQHNQLLIIYLYPEANLSPKEQIRLKQLL--ISLDVNIIVLTGSMHFLA 223 (333)
Q Consensus 176 eqvLPL~veemn~q~~~k~~~lIYLYPEANLs~KEqir~r~l~L---i~iVLT~S~FLA 235 (345)
T Consensus 225 ~l~~~~~l~~~~~iDEpe~~Lhp~~~~~l~~~~~QviitTHsp~~~~ 286 (308)
T dle69a\_ 225 KALVGLALLFALMEIKPSPFYVLDVDSPLDDYNAERFKRLLKENSKHOTQIVITTHNKIVME 286 (308)
T ss\_dssp HHHHHHHHHHHHHTTSCSEEEECcSSCCHHHHHHHHHHHHHTTSEEEECcCTTGGG
T ss\_pred hhHHHHHHHHHHhCCEEEECcChhHHhCCEEEECcCHHHHHHhCCEEEEEECcHHHHH

No 11

>PF13175 AAA\_15: AAA ATPase domain
Probab=78.91 E-value=21 Score=35.16 Aligned\_cols=57 Identities=26% Similarity=0.446 Sum\_probs=0.0

Q ss\_pred HHHHHHHHHHhCCEe---EEEEEccCCHHHHHHHHHhC---CCeEEECcChhHHH
Q gi|315659845|r 166 VLPIVIEELKQHNQLLIIYLYPEANLSPKEQIRLKQLLISL---DVNIIIVLTGSMHFLA 222 (333)
Q Consensus 178 vLPL~veemn~q~~~k~~~lIYLYPEANLs~KEqir~r~l~L---i~iVLT~S~FL 234 (345)
T Consensus 351 ~l~~~~~l~~~~~illidEPE~~Lhp~~~~~l~~~~~QiiitTHsp~ii 415 (415)
T PF13175 consen 351 YISLLINFLRENKESNNNNYILLLIDPELHLHPQAQRKFDLKKLSKNNNIQIITTHSPFI 415 (415)
T ss\_pred HHHHHHHHHHhCCEeEEEEcCccccCHHHHHHHHHHHhCCEEEEEECcChhC

No 12

>PF11398 DUF2813: Protein of unknown function (DUF2813); InterPro: IPR022602 This entry contains YbjD from Escherichia coli (strain K12), which is a conserved protein with a nucleotide triphosphate binding domain.
Probab=71.25 E-value=17 Score=39.29 Aligned\_cols=36 Identities=36% Similarity=0.271 Sum\_probs=0.0

Q ss\_pred ccCCCCHHHHHHHHHhCCEEEECcChhHHH
Q gi|315659845|r 189 PEANLSPKEQIRLKQLLISLDVNIIIVLTGSMHFLAQ 224 (333)
Q Consensus 201 PEANLs~KEqir~r~l~L~L~L~i~iVLT~S~FLae 236 (345)
T Consensus 293 PEARLHP~m~l~~a~w~l~l~1P~QKI~TtnSgeLLS~ 328 (373)
T PF11398 consen 293 PEARLHPIMLATAWSLLSLPGQKITTTNSGELLSQ 328 (373)
T ss\_pred cccccCHHHHHHHHHHHhCCEeEEeECcCHHHHH

No 13

>SUFFAM0050337 c.37.1 P-loop containing nucleoside triphosphate hydrolases (52540) SCOP seed sequence: dlwla\_.
Probab=69.89 E-value=24 Score=30.21 Aligned\_cols=36 Identities=36% Similarity=0.515 Sum\_probs=0.0

Q ss\_pred ccCCCCHHHHHHHHHhC---CCeEEECcChhHHH
Q gi|315659845|r 189 PEANLSPKEQIRLKQLLISL---DVNIIIVLTGSMHFLAQ 224 (333)
Q Consensus 201 PEANLs~KEqir~r~l~L---i~iVLT~S~FLae 236 (345)
T Consensus 363 ~~~~Ld~~~~~l~~~~L~~~~~h~~~~~ 401 (427)
T SUPFAM0050337 363 PTAGLDPENRERLLELLRELAEGGQVIVVTHDPFLAAR 401 (427)
T ss\_pred CcccCHHHHHHHHHHHHHhCCEEEEEECcHHHHH

No 14

>SUFFAM0050943 c.37.1 P-loop containing nucleoside triphosphate hydrolases (52540) SCOP seed sequence: dlxew.1.
Probab=66.11 E-value=31 Score=28.06 Aligned\_cols=34 Identities=35% Similarity=0.563 Sum\_probs=0.0

Q ss\_pred ccCCCCHHHHHHHHHhC---CCeEEECcChhHHH
Q gi|315659845|r 189 PEANLSPKEQIRLKQLLISL--DVNIIIVLTGSMHFL 222 (333)
Q Consensus 201 PEANLs~KEqir~r~l~L---i~iVLT~S~FL 234 (345)
T Consensus 256 ~~~~Ld~~~~~l~~~~L~~~~~h~~~~~ 291 (330)
T SUPFAM0050943 256 PTAGLDPETRELERLELLKELAEGRQVIVVTHDELELA 291 (330)
T ss\_pred ccccCHHHHHHHHHHHHHhCCEEEEEECcHHHH

No 15  
>SUPFAM0036790 c.37.1 P-loop containing nucleoside triphosphate hydrolases (52540) SCOP seed sequence: die69a\_  
Probab=65.91 E-value=34 Score=27.51 Aligned\_cols=35 Identities=34% Similarity=0.552 Sum\_probs=0.0

```
Q ss_pred          ccCCCCHHHHHHHHHHhC--CCcEEEEcCChHHH
Q gi|315659845|r  189 PEANLSPKEQIRLKQLLISL--DVNIIVLTGSMHFLA  223 (333)
Q Consensus       201 PEAnLS~KEqir~r~l~L--~i~iVLT~S~FLa  235 (345)
                  |.++|.+.+.+.++|.++  +.-+|.|.+.+.+.
T Consensus       250 p~~~Ld~~~~~]~~~~~h~~~~~  286 (308)
T SUPFAM0036790  250 PTSGLDPETREALLELLRELAKGRTVIVVTHDELLA  286 (308)
T ss_pred         ccccCHHHHHHHHHHHhCCEEEEEcCHHHH
```





No 9

>cd03293 ABC\_NrtD\_SsuB\_transporters NrtD and SsuB are the ATP-binding subunits of the bacterial ABC-type nitrate and sulfonate transport systems, respectively. ABC transporters are a large family of proteins involved in the transport of a wide variety of different compounds, like sugars, ions, peptides, and more complex organic molecules. The nucleotide binding domain shows the highest similarity between all members of the family. ABC transporters are a subset of nucleotide hydrolases that contain a signature motif, Q-loop, and H-loop/switch region, in addition to, the Walker A motif/P-loop and Walker B motif commonly found in a number of ATP- and GTP-binding and hydrolyzing proteins.

Probab=95.32 E-value=0.75 Score=41.53 Aligned\_cols=93 Identities=14% Similarity=0.162 Sum\_probs=0.0

Q ss\_pred HHHHHhhCcc--hhcccchHHHHHHHHhhhhhhcccCcccccEEEEECCHhChHHHHHHHHHHHH--ceeEE
Q qi|389815356|r 136 FEQLIKIAPIE--VRTVSDPEPMGAYQYSFLKSWLHLVHNKATNVCFYDFPENLNKSELKELQFATSQ---ACTMI 209 (288)
Q Consensus 138 l~kLk~f~d~--fhn~lddl~n~qrk~Fid~L~h~keNvL~LFE~hLg~sd~K~f~-----T~I 211 (291)
T Consensus 112 ~~~~~~L~a~l~a~-----LsgG~--qrl~l~a~l~a~-----p~l1LLEPt~LD~-----L~-----tii 186 (220)
T cd03293 112 ABEELLVLSGFENAYPHQLSGMQRVALARALAV-----DPDVLLEDFPSALDALTRQLQEBLLDIWRETGTKTVL 186 (220)
T ss\_pred HHHHHHHChhHHHhCcccccCHHHHHHHHHHHHHc-----CCEEEECCcccCHHHHHHHHHHHHHhCCEEEE

Q ss\_pred EEcCHHHHHhCccceeeec-CCc
Q qi|389815356|r 210 CLTTSPOVINQVGLSNVHLIKR-TGE 234 (288)
Q Consensus 212 i~T~hP~i~i~v~nv~LiK~nge 236 (291)
T Consensus 187 i~sH~-----d~i~l~-----G~ 211 (220)
T cd03293 187 LVTHDIDEAVFLA-DRVVLSARPR 211 (220)
T ss\_pred EEcCHHHHHhC-CEEEEECCcC

No 10

>d1e69a\_c.37.1.12 (A:) Smc head domain {Thermotoga maritima [TaxId: 2336]}
Probab=95.25 E-value=0.36 Score=43.76 Aligned\_cols=76 Identities=13% Similarity=0.133 Sum\_probs=0.0

Q ss\_pred HHHHHhhHHhhhhcCCccceEEEEECCHhChHHHHHHHHHHhh--eeEEEEcCHHHHHhCccceeeecCCcc
Q qi|389815356|r 159 QYSFLKSWLHLVHNKATNVCFYDFPENLNKSELKELQFATSQA---CTMICTTSPQVINQVGLSNVHLIKRTGER 235 (288)
Q Consensus 161 qrk~Fid~L~h~keNvL~LFE~hLg~sd~K~f~-----T~Ii~T~hP~I~i~v~nv~LiK~nge~ 237 (291)
T Consensus 224 ~~~~~~i~l~a~l~a~-----vlllDEp~LD~-----L~-----qviittH~----- 301 (308)
T d1e69a 224 EKALVGLALFALMEIKPSPFFVLDVDSPLDDYNAERFKRLKENSKHQPIVITHNKIVMEADLL-HGVTMVNGVS 301 (308)
T ss\_dssp HHHHHHHHHHHHHHtttCCcEEEBESSCCCHHHHHHHHHHHHtttEEEBECCCTGGCCSE-EEEBESSCE
T ss\_pred HHHHHHHHHHHHHHCCCEEBECCcccccCHHHHHHHHHHHHhCCcCEEEEEcCHHHhhhhhhE-EEEBECCCE

No 11

>TIGR02211 LolD\_lipo\_ex lipoprotein releasing system, ATP-binding protein. This model represents LolD, a member of the ABC transporter family (pfam00005). LolD is involved in localization of lipoproteins in some bacteria. It works with a transmembrane protein LolC, which in some species is a paralogous pair LolC and LolE. Depending on whether the residue immediately following the new, modified N-terminal Cys residue, the nascent lipoprotein may be carried further by LolA and LolB to the outer membrane, or remain at the inner membrane. The top scoring proteins excluded by this model include homologs from the archaeal genus Methanosarcina.

Probab=95.22 E-value=0.82 Score=41.08 Aligned\_cols=94 Identities=13% Similarity=0.282 Sum\_probs=0.0

Q ss\_pred HHHHHhhCcc--hhcccchHHHHHHHHhhhhhhcccCcccccEEEEECCHhChHHHHHHHHHH--ceeEE
Q qi|389815356|r 136 FEQLIKIAPIE--VRTVSDPEPMGAYQYSFLKSWLHLVHNKATNVCFYDFPENLNKSELKELQFATSQA---ACTMI 209 (288)
Q Consensus 138 l~kLk~f~d~--fhn~lddl~n~qrk~Fid~L~h~keNvL~LFE~hLg~sd~K~f~-----T~I 211 (291)
T Consensus 122 ~~~~~~L~a~l~a~-----LsgG~--qrv~l~a~l~a~-----p~illDEPt~LD~-----L~-----tii 196 (221)
T TIGR02211 122 AYEMLKVLGELHRNHRPELSGGERQVAIARALAV-----QPSVLVADEPTGNLDDNNAKIIFDLMLLNRELNTPSFL 196 (221)
T ss\_pred HHHHHHhCChhHHhCChHHHHHHHHHHHHc-----CCEEEEcCCCCCHHHHHHHHHHHHHhCCcCEEEEEcCHHHHHhChE-EEEBECCCE

Q ss\_pred EEcCHHHHHhCccceeeec-CCccccc
Q qi|389815356|r 210 CLTTSPOVINQVGLSNVHLIKRTGERYS 237 (288)
Q Consensus 212 i~T~hP~i~i~v~nv~LiK~nge~ 239 (291)
T Consensus 197 ~tH~-----d~v~l~-----g~i~ 221 (221)
T TIGR02211 197 VVTHDLELAKKL--DRVLEMK-DGQLFN 221 (221)
T ss\_pred EEcCHHHHHhC-CEEEEEc-CCeC

No 12

>SUFFAM0050337 c.37.1 P-loop containing nucleoside triphosphate hydrolases (52540) SCOP seed sequence: dlwlwa\_
Probab=95.16 E-value=0.74 Score=38.14 Aligned\_cols=74 Identities=18% Similarity=0.277 Sum\_probs=0.0

Q ss\_pred HHHHHhhhhhhhhcCCccceEEEEECCHhChHHHHHHHHHH--ceeEEEEcCHHHHHhCccceeeecCCcc
Q qi|389815356|r 159 QYSFLKSWLHLVHNKATNVCFYDFPENLNKSELKELQFATSQA---ACTMICTTSPQVINQVGLSNVHLIKRTGER 233 (288)
Q Consensus 161 qrk~Fid~L~h~keNvL~LFE~hLg~sd~K~f~-----T~Ii~T~hP~I~i~v~nv~LiK~nge~ 235 (291)
T Consensus 337 e~-----L~a~-----LDEp~LD~-----L~-----h~----- 413 (427)
T SUFFAM0050337 337 EKQRLALALALABELPPLLLLEPTAGLDPENRRELLELASEGGQVIVVTHDPELAARL-ADRILVLKDG 413 (427)
T ss\_pred HHHHHHHHHHHHHHhCCCEEBECCcccCHHHHHHHHHHHHHhCCcCEEEEEccCHHHHHHHHHHH--ccEEEEEcCC

No 13

>3zgx\_A\_SMC, chromosome partition protein SMC; cell cycle; 3.40A {Bacillus subtilis}
Probab=95.04 E-value=0.42 Score=42.72 Aligned\_cols=77 Identities=10% Similarity=0.156 Sum\_probs=0.0

Q ss\_pred HHHHHhhhhhhhhcccCccceEEEEECCHhChHHHHHHHHHH--ceeEEEEcCHHHHHhCccceeeecCCcc
Q qi|389815356|r 159 QYSFLKSWLHLVHNKATNVCFYDFPENLNKSELKELQFATSQA---ACTMICTTSPQVINQVGLSNVHLIKRTGER 236 (288)
Q Consensus 161 qrk~Fid~L~h~keNvL~LFE~hLg~sd~K~f~-----T~Ii~T~hP~I~i~v~nv~LiK~nge~ 238 (291)
T Consensus 333 e~-----L~a~-----lDEp~LD~-----L~-----Q~iittHsp~-----d~-----v~ 410 (426)
T 3zgx\_A 333 ERALTAIALFSLKVRPVPFVCLDEVAALDEANVFRFAQYLKYSSTDPQIVITHRKGTEEA--DVLVGYVMTQESGV 410 (426)
T ss\_dssp HHHHHHHHHHHHHHhCCcEEEBESSTTTCCHHHHHHHHHHHHhCCSSSSSEEBECSCCHHH--CCEEBEEc-CC-
T ss\_pred hHHHHHHHHHHHHhCCcEEEBECCcccCHHHHHHHHHHHHHhCCcEEEBEEcCHHHHHh--CcEEEBEEcCCCC

Q ss\_pred c
Q qi|389815356|r 237 s 237 (288)
Q Consensus 239 ~ 239 (291)
T Consensus 411 s 411 (426)
T 3zgx\_A 411 s 411 (426)
T ss\_dssp B
T ss\_pred E

No 14

>1w1w\_A Structural maintenance of chromosome 1; cohesin, chromosome segregation, cell adhesion, kleisin, MIT cell cycle; HET: AGS; 2.90A (Saccharomyces cerevisiae) SCOP: c.37.1.12
Probab=94.95 E-value=0.79 Score=41.46 Aligned\_cols=77 Identities=8% Similarity=0.119 Sum\_probs=0.0

Q ss\_pred HHHHHhhhhhhhhcccCccceEEEEECCHhChHHHHHHHHHH--ceeEEEEcCHHHHHhCccceee-eeecCCc
Q qi|389815356|r 159 QYSFLKSWLHLVHNKATNVCFYDFPENLNKSELKELQFATSQA---ACTMICTTSPQVINQVGLSNVHLIKRTGER 234 (288)
Q Consensus 161 qrk~Fid~L~h~keNvL~LFE~hLg~sd~K~f~-----T~Ii~T~hP~I~i~v~nv~LiK~nge~ 236 (291)
T Consensus 338 e~-----L~a~l~a~-----lDEp~LD~-----L~-----Q~IvtTH~-----ad~-----v~ 415 (430)
T 1w1w\_A 338 EKTVAALALLFAINSYQSPFFVLDVDAALDITNVQRIAAVIRRRNPDQLQFIVISLKNMTF--EKSDALVGVYRQQQE 415 (430)
T ss\_dssp HHHHHHHHHHHHHHtttCCcEEEBESSTTTCCHHHHHHHHHHHHhCCBTBEEEBECCSCHHH--TTCSEEBEEEBETT
T ss\_pred HHHHHHHHHHHHHhCccCEEBECCcccCHHHHHHHHHHHHHhCCcCEEBEEcCHHH--HhCCcEEEBEEcCC

Q ss\_pred ccc  
Q gi|389815356|r 235 RYS 237 (288)  
Q Consensus 237 ~~~ 239 (291)  
T Consensus 416 ~+~ 418 (430)  
T lwlw\_A 416 NSS 418 (430)  
T ss\_dssp TEE  
T ss\_pred Cce

No 15  
>PRK10247 putative ABC transporter ATP-binding protein YbbL; Provisional  
Probab=94.94 E-value=1 Score=41.20 Aligned\_cols=94 Identities=13% Similarity=0.127 Sum\_probs=0.0

Q ss\_pred HHHHHhCcc---hhcccchHHHHHHHHHHhhhhhhccCcccccEEEECChhcCHHHHHHHHHHHhh---ceeE  
Q gi|389815356|r 136 FEQLIKIAPIE---VRTVSDPEMGAYQYSFLLKSWLHLVHNKATNVCFYDFPENELNKSELKELQFATSQ----ACTM 208 (288)  
Q Consensus 138 l~kLlk~f~d---fhn~lddl~qrk~Fid~~~~L~h~keNv1~~lFPE~hLg~sd~K~f~~~~~t~ 210 (291)  
T Consensus 117 ~~~1~~~1~~~~~LS~G~grv~laral~~~~~p~llllDEft~~LD~~~~~l~~~1~~~~~tv 191 (225)  
T PRK10247 117 FLDDLERFALPDTILTKNIAELSGGEKQRISLIRNLQF----MPKVLLLEITSALDES NKHNVEI IHRYVREQNI AV 191 (225)  
T ss\_pred HHHHHhCccCHHHhCcccccCHHHHHHHHHHHhhc-----CCEEEEeCcccccCHHHHHHHHHHHHHhhcCCEE

Q ss\_pred EEEeCCHHHHhCccceeeecCcc  
Q gi|389815356|r 209 ICLTSPQVINQVGLSNVHLIKRTGERY 236 (288)  
Q Consensus 211 Ii~T~hP~I~I~i~nv~LiK~nge~~ 238 (291)  
T Consensus 192 ii~sh~~~~~d~i~l~~~~~ 217 (225)  
T PRK10247 192 LWVTHDKDEIN~H~ADKVITLQPHAGEM 217 (225)  
T ss\_pred EEEECCHHHH~h~CCEEEeEccchH

HHPRED hits for Csn2 short

Table with columns: No Hit, Probab, E-value, P-value, Score, SS, Cols, Query HMM, Template HMM. Lists 15 hits for Csn2 short.

No 1
>2yl5\_A Beta-N-acetylhexosaminidase; hydrolase; 2.15A {Streptococcus pneumoniae} PDB: 2yla\_A\* 2yl9\_A\*
Probab=68.49 E-value=45 Score=36.01 Aligned\_cols=70 Identities=16% Similarity=0.270 Sum\_probs=0.0

Q ss\_pred cHHHHHHhCcCecccCCcCHHHHHHHHHHHHHhCCCEEEEE-----
Q gi|339625078|r 126 ELERLLHSQNIIVVEKGNSTIFGKIEEVIHVMGMLDESRYLFLT----- 169 (224)
Q Consensus 141 d~~~lK~~~ikie~~~ekl~~~iKi~~~l~~kkllvfv----- 184 (251)

Q ss\_pred ---ChHHhCCHHHHHHHHHHHhCCeEE
Q gi|339625078|r 170 ---NASLYCKLSDLNQLHECLLAEGVNL 195 (224)
Q Consensus 185 ---Nl~~YlT~~el~~L~~i~~~l~vL~i 210 (251)

No 2
>dlt5ia c.37.1.19 (A:): Spliceosome RNA helicase BAT1 {Human (Homo sapiens) [TaxId: 9606]}
Probab=66.89 E-value=64 Score=29.83 Aligned\_cols=45 Identities=13% Similarity=0.269 Sum\_probs=0.0

Q ss\_pred HHHHHHHHHHHhCCCEEEEEChHHhCCHHHHHHHHHHHhCCeEEEE
Q gi|339625078|r 148 GKIEEVIHVMGMLDESRYLFLTNASLYCKLSDLNQLHECLLAEGVNLISI 197 (224)
Q Consensus 163 eki~~~iki~~~l~~kkllvfvNl~~YlT~~el~~L~~i~~~l~vL~i 212 (251)

No 3
>dls2ma2 c.37.1.19 (A:252-422) Putative ATP-dependent RNA helicase DHH1 {Baker's yeast (Saccharomyces cerevisiae) [TaxId: 4932]}
Probab=64.23 E-value=67 Score=29.63 Aligned\_cols=45 Identities=11% Similarity=0.121 Sum\_probs=0.0

Q ss\_pred HHHHHHHHHHHhCCCEEEEEChHHhCCHHHHHHHHHHHhCCeEEEE
Q gi|339625078|r 148 GKIEEVIHVMGMLDESRYLFLTNASLYCKLSDLNQLHECLLAEGVNLISI 197 (224)
Q Consensus 163 eki~~~iki~~~l~~kkllvfvNl~~YlT~~el~~L~~i~~~l~vL~i 212 (251)

No 4
>d2gjxal c.1.8.6 (A:167-528) beta-hexosaminidase A {Human (Homo sapiens) [TaxId: 9606]}
Probab=51.25 E-value=81 Score=33.35 Aligned\_cols=61 Identities=13% Similarity=0.196 Sum\_probs=0.0

Q ss\_pred CeEcccCCcCHHHHHHHHHHHhCCCEEE-----EEChHHh-----CCHHHHHHHHHHHhC
Q gi|339625078|r 135 NIVVEKGNSTIFGKIEEVIHVMGMLDESRYLFLT-----LTNASLY-----CKLSDLNQLHECLLAEG 191 (224)
Q Consensus 150 ~~eki~~~iki~~~l~~kkllvfvNl~~YlT~~el~~L~~i~~~l~vL~i 206 (251)

Q ss\_pred CeEE
Q gi|339625078|r 192 VNLI 195 (224)
Q Consensus 207 l~vL 210 (251)

No 5
>d2rb4al c.37.1.19 (A:307-474) ATP-dependent RNA helicase DDX25 {Human (Homo sapiens) [TaxId: 9606]}
Probab=51.19 E-value=1.3e+02 Score=28.07 Aligned\_cols=48 Identities=8% Similarity=0.167 Sum\_probs=0.0

Q ss\_pred cHHHHHHHHHHHHhCCCEEEEEChHHhCCHHHHHHHHHHHhCCeEEEE
Q gi|339625078|r 145 TIFGKIEEVIHVMGMLDESRYLFLTNASLYCKLSDLNQLHECLLAEGVNLISI 197 (224)
Q Consensus 160 ~~eki~~~iki~~~l~~kkllvfvNl~~YlT~~el~~L~~i~~~l~vL~i 212 (251)







## C

Proteins with structure most similar to *S. thermophilus* Csn2 structure (3zth)

|        | Target                                                                                     | Q-score | P-score  | Z-score | Seq%   |
|--------|--------------------------------------------------------------------------------------------|---------|----------|---------|--------|
| 1wlw:A | <i>S. cerevisiae</i> Smc1                                                                  | 0.1447  | -0       | 6.767   | 11.73  |
| 4i99:A | <i>P. furiosus</i> Smc                                                                     | 0.1404  | 0.6379   | 8.12    | 11.9   |
| 1vpl:A | <i>T. maritima</i> ABC transporter ATP-binding protein                                     | 0.1374  | -0       | 5.211   | 13.38  |
| 2onk:A | <i>A. fulgidus</i> Molybdate/tungstate ABC transporter, ATP-binding protein                | 0.1346  | -0       | 5.001   | 7.273  |
| 4glu:D | <i>Y. pestis</i> Hemin import ATP-binding protein HmuV                                     | 0.1308  | 1.04e-09 | 5.957   | 13.69  |
| 4hlu:C | <i>T. maritima</i> Energy-coupling factor transporter ATP-binding protein Ecfa             | 0.1288  | -0       | 5.253   | 11.52  |
| 2olk:A | <i>G. stearothermophilus</i> Amino acid ABC transporter                                    | 0.1271  | -0       | 5.316   | 10.19  |
| 1g6h:A | <i>M. jannaschii</i> high-affinity branched-chain amino acid transport ATP-binding protein | 0.1266  | -0       | 5.862   | 10.69  |
| 4fi3:C | <i>E. coli</i> Vitamin B12 import ATP-binding protein BtuD                                 | 0.1253  | -0       | 5.085   | 10.78  |
| 2fgk:B | <i>E. coli</i> Alpha-hemolysin translocation ATP-binding protein hlyB                      | 0.1231  | -0       | 4.874   | 12.26  |
| 2yz2:A | <i>T. maritima</i> Putative ABC transporter ATP-binding protein TM_0222                    | 0.1219  | -0       | 5.316   | 0.1562 |
| 112t:A | <i>M. jannaschii</i> Hypothetical ABC transporter ATP-binding protein MJ0796               | 0.1216  | 0.001364 | 5.357   | 0.1241 |

Proteins with structure most similar to *S. pyogenes* Csn2 structure (3toc)

|        | Target                                                                                     | Q-score | P-score  | Z-score | Seq%  |
|--------|--------------------------------------------------------------------------------------------|---------|----------|---------|-------|
| 2onk:A | <i>A. fulgidus</i> Molybdate/tungstate ABC transporter, ATP-binding protein                | 0.1986  | 0.05449  | 4.77    | 9.028 |
| 2pcj:A | <i>A. aeolicus</i> Lipoprotein-releasing system ATP-binding protein lolD                   | 0.1959  | 0.00532  | 4.49    | 7.692 |
| 3gfo:A | <i>C. perfringens</i> Cobalt import ATP-binding protein cbiO 1                             | 0.1766  | 0.1979   | 5.312   | 14.39 |
| 1ji0:A | <i>T. maritima</i> ABC transporter TM_1139                                                 | 0.1728  | 0.859    | 5.647   | 15.15 |
| 3n70:D | <i>E. coli</i> P-loop NTPase domain of the Sigma-54 transport activator                    | 0.172   | 0.09933  | 3.876   | 6.522 |
| 2fgj:A | <i>E. coli</i> Alpha-hemolysin translocation ATP-binding protein hlyB                      | 0.1675  | 0.3295   | 5.372   | 8.759 |
| 2olk:B | <i>G. stearothermophilus</i> Amino acid ABC transporter ArtP                               | 0.1624  | -0       | 4.349   | 4.511 |
| 3vx4:A | <i>S. mutans</i> Putative ABC transporter, ATP-binding protein ComA                        | 0.1614  | 0.493    | 5.853   | 6.923 |
| 2ihy:A | <i>S. aureus</i> ATPase subunit of ABC transporter                                         | 0.1602  | -0       | 4.327   | 11.03 |
| 1g9x:C | <i>M. jannaschii</i> High-affinity branched-chain amino acid transport ATP-binding protein | 0.1597  | -0       | 4.683   | 10.08 |
| 117v:C | <i>E. coli</i> Vitamin B12 transport system permease protein Btuc                          | 0.1591  | 8.58e-10 | 4.305   | 8.209 |

```
3zth:Ass -----EE-EE-----EE-EE-----EEEE--HHHHHHHHHHHHHH--HH-----HHHHHH-----
3zth:A (1) ---X-KF-FV-QH--P-----Y-K---ERIE-LNI-G--AITQIVGQNNELKYTWQILSWYF--GG--KK---YSSDLS-----IFDYEEP-----TILDEAREIVKRSSY-----

1wlw:Ass --EE-EE-EEE-----EE-E-EE-----EEEE--HHHHHHHHHH--HHH-----HH-----HHH-----EEEEEE-----EEE-EEEEEEEE-----E--
1wlw:A (2) GRLV--GL-ELSNF--K-----SY-RG--VT-K-VGFGES-NFTSIIGP-NGS--GKSNMMDAIS--FVLGV-----L-----DLIYRGPQSAYVKAF-----YQGNKLVLELMRIISRNGDT--
4i99:A (2) --PYI-EKLE--LKGFK-----S--YGKKV--VIPFS-K--GFTAIVGA-NGS--GKSNIGDAILFVLG--GLSAKAXRASRISDLIFAGSKNEPPAKYAE-----VAIY-----FNNEDRGFPIDEDDEVVIRRRVY
1vp1:A (2) --GAVVV-KDLRK--RIG-----KKEILK--GI-S-FEI-EEGEIFGLIGP-NGA--GKTTLRIIS--T--L-----I-----I-----KPS-----SGIVT-----VFGKNV-----
2onk:A (1) --MF--LK-VRAEK--RLG-----NFR--L--NV-D-FEM-GR-DYCVLLIGP-TGA--GKSVFLELIA--G--I-----V-----KPD-----RGEVR-----LNGADIT-----
4glu:D (10) --ALL-EA-SHLHY--HVQ-----QQALIN--DV-S-LHI-ASGEMVAIIGP-NGA--GKSTLLRLLT--G--Y-----L-----L-----SPS-----HGECH-----LLGQNLN-----
4hlu:C (999) GSGRI-EL-NSVSF--RYN-----GDYVLK--DV-N-AEF-ETGKIYVVVGK-NGS--GKTLLKILA--G--L-----L-----L-----AA-----AGEIF-----LDGSPAD-----
2olk:A (1) ---MIDV-HQLKK--SFG-----SLEVLK--GI-N-VHI-REGEVVVIGP-SGS--GKSTFLRCLN--L--L-----E-----DFD-----EGEII-----IDGINLKA-----
1g6h:A (4) -TMEILRT-ENIVK--YFG-----EFKALD--GV-S-ISV-NKGDVTLIIGP-NGS--GKSTLINVIT--G--F-----L-----L-----KAD-----EGRVY-----FENKDIT-----
4fi3:C (2) --SIVMQL-QDVAE--S-----TRLG--PL-S-GEV-RAGEILHLVGP-NGA--GKSTLLARMA--G--M-----T-----SG-----KGSIQ-----FAGQPLE-----
2fgk:B (467) ---DI-TF-RNIRF--RYKP-----DSPVILD--NI-N-LSI-KQGEVIGVGR-SGS--GKSTLTKLIQ--R--F-----Y-----IPE-----NGQVL-----IDGHDLA-----
2y2:A (1) --MRI-EV-VNVSH--IFHRGTPLEKKALE--NV-S-LVI-NEGECLLVAGN-TGS--GKSTLLQIVA--G--L-----I-----I-----EPT-----SGDVL-----YDGERK-----
112t:A (1) ---MI-KL-KNVTK--TYKMG-EEIIYALK--NV-N-LNI-KEGEFVSIKMP-SGS--GKSTMLNIIIG--C--L-----D-----D-----KPT-----EGEVY-----IDNIKTNDL-----
```

```
3toc:Ass -----EEE-----EEEEEE-HH-H-HHHHHHHHHHH-----E--EE-----E-EEE-----HHHHHHHHHHHHHHHHHHHHHHHHHHHHHHHHHHHHHHHH
3toc:A (1) -----XNLNFSLLDEPI-PLRG-GTILVLEDV-C-VFSKIVQYCYQYES--ELK--FFXKT-----IKES-----EI-XLV-T-DILGFDVNSSTILKLIHADLESQFNEKPEVKSXIDKLVATITELIVF

2pcj:Ass -----EEEEEEEEEEEE--EEEEEE-EE-EE--EEEE-E-----HHHHHHHHHH-----EEEEEE-----HHHHHHHHHH--HHHE-EEE-----HHHHHHHHHHHHHH--HHHH--
2pcj:A (2) ---AEILRAENIKKVIKYEILKGIS-LS--VKKGEFVSII-GAS-GSGKSTLLYILG-LLDAPTEGKVFLGKVEVDYTNKELSLLR--NRKL-GFV-FQFH-YLIPELTALENVI VPKMKGPKKKEA-----
2onk:A (1) -----MFLKVRAEKRLGNFRINVD-FE--MGRD-YCVLL-GPT-GAGKSVFLELIA-GIVKPDGRGEVRLNGAD----ITPLPPE--RRGI-GFV-PQDY-ALFPHLSVYRNIA YGLRNVVERVD-----
3gfo:A (2) --EDYILKVEELNYNSDGTHALKGIN-MN--IKRGEVTAIL-GGN-GVGKSTLFQNFN-GILKPSGSRILFDNKPID-YSRKGMIML--RESI-GIV-FQDPDNQLFSASVYQDV-SFGAVNMKLPEDI-----
1ji0:A (1) --VSDIVLEVQSLHVYGAHAIRKID-LK--VPRGQIVTLI-GAN-GAGKTTLSAIA-GLVRAQKGIIFNGQDIT-NKPAHVINR--XGI-ALV-PEGR-RIFPELTVYENLXXGAYNRKDKKEGK-----
3n70:D (158) -----RL-QQLSE-TD-IAVWL-YGAPGTGRXTGARYLH-Q-----F--GRN-----AQ-----GEFVY-R-E-LT-----F--GRN-----AQ-----GEFVY-R-E-LT-----
2fgj:A (467) ---DITFRNIRFRYPKSPVILDNIN-LS--IKQGEVIGIV-GRS-GSGKSTLTKLIQ-RFYIPENGQVLIDGHDL--ALADPNWL--RRQV-GVV-LQD--NVLLNRSIIDNISLANPGMSVEKVIYAA-----
2olk:B (1) -----MIDVHQLKKSFGSLEVLKGIN-VH--IREGEVVVVI-GPS-GSGKSTFLRCLN-LEDFDEGEI IIDGINLK-AKDTNLNKV--REEV-GMV-FQR--FNLFPHMTVLNNITLAPMKVRKWPREK-----
3vx4:A (522) SFLDGDISFENLSYKYGFRDRLSDIN-LS--IKKGSKVSIV-GAS-GSGKSTLAKLIV-NFYEPNKGIVRINGNDL--KVIDKTAL--RRHI-SYLPQ-Q--AYVFSGSIMDNLVGAKEGTSQEDIIRA-----
2ihy:A (1) ---XLIQLDQIGRXKQKTKILKIS-WQ--IAKGDWILY-GLN-GAGKTTLLNINL-AYEPATSGTVNLFQKX--PGYSAETV--RQHI-GFV-S-HSLEKQFEGGERVIDVVISGAIDDEIR-----
1g9x:C (2004) ---TMEILRTENIVKYFGEFKALDGVIS-IS--VCKGDVTLII-GPN-GSGKSTLINVIT-GFLKADEGRVYFENKD--ITNKEPAELYHYGIV-RTF-Q-T--PQPLKEMTVLENLLIGEINPGESPLNSLFYKKW-----
117v:C (2) -----SIVXQLQDVAESTRLGPLS-GE--VRAGEILHLV-GPN-GAGKSTLLARXA-GKTS-GKGSIQFAGQFL--EAWSATKL--ALHR-AYLSQ-Q--QTFFATPVWHYLLHGHDKTRTE-----
```

```

3zth:Ass -----E-----EEE-E--HH--HH-----H-----HHH-----HHHHHHHHHHHHHHHHHHHHHHHHHHHHHHHH
3zth:A -----H-----YID-I-SSF--KD-----L-----LEQXEYKKGTLAQGYLRKIVNQVDIVGHLEKINEQVELIEEA

1wlw:Ass -----EEEE--EEEEHHHHHHHHHHHHHH-----HH-----H-----HH-----
1wlw:A -----SYKIDGKTVSYKDYSIFLENENILIKAKNFLV-FQGDV-EQ-----I-----AA-----
4i99:A PDGRSSYWLNGRRATRSEILDILTAAAXIS-PDGYNI--VLQGDITK-----FI-----KX-----
1vpl:A -----VEEPHEVR---KLISYLPE-EA---G-----A-----Y-----
2onk:A -----PLPPERRG-----IGFV-F-QDY--A-----L-----F-----
4glu:D -----SWQPKALAR-----TRAVM-R-QY---S-----E-----LAFPPSVSEVIQMGRAPYGGSQD-----
4hlu:C -----FLLRKN-----VGYV-F-QNP--SS-----Q-----IGATVEEDVAFSLEIMGLDESE-----
2olk:A -----KDTNLNKVRE---EVMV-F-QR---F-----N-----LF-----
1g6h:A -----NKEPAELYH---YGIVRT-F-QT---PQPLKEMTVLENLLIGEICPGESPLNSLFYKWI PKEEEMVE--KAFKILEFLKLSHLYDRKA-----
4fi3:C -----AWSATKLAL---HRAYLSQ-QQ---T-----PPFATPVWHYTLHQHDKTRTELNDVAGALALDDKLGST-----
2fgk:B -----LADPNWLR---QVGVV-L-QD---N-----V-----LLNRSIIDNISLANPGMSVEKVIYA-----
2yz2:A -----KGYEIRR---NIGIA-F-QYP-ED-----Q-----F-----
112t:A -----DDELTKIRR---DKIGFV-F-QQF--N-----L-----I-----

```

```

3toc:Ass HHHHH-----HHHHHHHHHH-----H--HHHHHHHHHHHHHH-----EEEE-H-HHH-----HHHHHHHHHHHHHH-----EEEE-----EEEE--EEE-----
3toc:A ECLENELDLLEYDBITILELIKSLGVK VETQSD-T--IFEKCLEILQIFKYLTK-----KKLLIFVNS-GAFL---TKDEVASLQEYISLTN--L-TVLFLEPREL---Y-D---F--P-----QYILDLITKNX-----

2pcj:Ass -----HHHHHHHHHHHH-----HHHHHH--HHHHHHHHHHHHHH-----EEEE-----HHHHHHHHHHHHHHHHHHHHHH-----EEEE-----HHH-H-----H-----EEEEEE--EEEEEE-----
2pcj:A -----KERGEYLLSELGLGDKLSFKPYELS-GGEQQRVAIARALA---NE-----PILLFADEP-TGNLDSANTKRVMDFLKINEG-G---T-SIVMVT---HEREL-A-----E--LTH---RTLEMKDGKVVGEITRV---
2onk:A -----RRVREMAEKLGIHLLDKPARLS-GGERQQRVALARALV---IQ-----PRLLLLDEP-LSAVDLTKGVLMEELRFVQREFD---V-PILHVT---HDLIE-AA---M--LAD---EVAVMLNGRIVEKGLKELFS
3gfo:A -----RKRVDNALKRTGIEHLKDKPTHCLS-FGQKRVAIAGVLV---ME-----PKVLILDEP-TAGLDPMGVSEIMKLLVEMQKELG---I-TIIITH---DIDIV-P-----L--YCD---NVFVMKEGRVILQGNPKEVFA
1ji0:A -----RDLEWIFSLFPRKLERLKGGLGTTLS-GGEQQXLAIGRALX---SR-----PKLLXXDEP-SLGLAPILVSEVFEVIQKINQE-G---T-TILLVE---QNALGAL---K--VAH---YGYVLETGQIVLEGKASELLD
3n70:D -----PDNAP-QLNDFIALA-----Q-----G-GTLVLSH-PEHL---TREQQYHLVQLQSQEH---RPFRLIGI---GDTSL-VEIAELYCFA-----XTQ-----
2fgj:A -----KLAGAHDFISELREGYNTIVGEGAGLSGGQ-RQRIAIARALV---NN-----PKILIFDEATSALD---YSEHVIMRNMHKICKG--R-TVIIIA---A---R-L-----S--TVKN-ADRIIVMEKGIIVEQGKHKELLS
2olk:B -----AEAKAMELLDKVGLKDKAHAYPDSLS-GGQAQRVAIARALA---ME-----PKIMLFDEP-TSALDPEMGEVLSVMKQLANE-G---M-TMVVVT---H---E-M-----G--FAREVGDRLVFMGGYIEEGKPEDLFD
3vx4:A -----CEIAEIRSDIEQMPQGYQTELSDGAGISGGQ-QRIALARALL---TQ-----APVLILDA--TSSL---DILTEKKIISNLLQM-TE--K-TIIFVA---H---R-L-----S--ISQR-TDEVIVMDQGKIVEQGTHELLA
2ihy:A -----NEAHLKLVGXSAKAQQYIGYLS-TGEKQRVXIARALX---GQ-----PQVLILDEP-AAGLDFIARESLLSILDSLSDSYPT--L-AXIYVTH---FI-EE-I-----T--ANF---SKILLKDGQSIQQGAVEDIIT
1g9x:C -----IPKEEEMVEKAFKILEFLKLSHLYDRKAGELS-GGQMKLVEIGRALM---TN-----PKMIVMDEP-IAGV---APGLAHDIFNHVLEL-KAKGI-TFLIEH---R---L-D-----I--VLNY-IDHLYVMFNGQI IAEGRGEEIK
117v:C -----LLNDVAGALALDDKLGSTNQLSGGE-WQRVRLAAVVL---QITPQANPAGQLLLLEP-XNSL---DVAQQSALDKILSALCQQL-AIVXSS---H---D-L-----N--HTLRHAHRAWLLKGGKXLASGRREEVLT

```

```

3zth:Ass HHH-----HHHHHHHH---EEE---EEHHH-----HH-----HHHHHHHHHHHHHHHH-----
3zth:A XNRHINLNCGQVEYHLENLPLTLDQLLTKNFSFFAIENKNLSFE-----WV-----SNIDKLSLFLEXLDHLLSQ---TTE

1w1w:Ass -----HHHHHHHHH-HHHHHHHH-----HHHHHHH---EEEE---EEEE-----HHHHHHHHHHHHHHHHHHHH-----
1w1w:A -----QSPVELSRMFTFDYVSDH-----LDAIYRELTGNASLTKYHATPPLKRFK-DMEYLSGGKEKTVAAALALLFAINSYQP-----S
4i99:A -----SPLERRLIIDDISGIKEKKNVFXRTFEAISRNFSSEIFAKLSPGGSARLILENPEDPFSGGLEIEAKPAGKDVKRIEAXSGGEKALTALAFVFAIQKF-KP-----A
1vpl:A -----RNMQGI EYLR FVAGFYASSSE-----IEEMVERATEIAGLGEKIKDRVST-----YSKGMVRKLLIARALMVN-----P
2onk:A -----PHLSVYRNIA YGLRNVERVER-----DRRVREMAEKLGI AHLDRKPA-----RLSGGERQRVALARALVIQ-----P
4glu:D -----RQALQQVMAQTDC LALAQRD YR-----VL-----SGGEQQRVQLARVLAQL-----W
4hlu:C -----MRKR I KKVLELVGLSGLAAADPL-----NL-----SGGQKQRLAIASMLARD-----T
2olk:A -----PHMTVLNNITLAPMKVRKWPRE-----KAEAKAMEL LDKVGLKDKAHAYPD-----SLSGGQQRVAIARALAME-----P
1g6h:A -----G-----EL-----SGGQMKLVEIGRALMTN-----P
4fi3:C -----N-----QL-----SGGEWQVRVRLAAVV LQITPQANPAG
2fgk:B -----AKLAGAHDFISELREGYNTIVGEQGA-----GL-----SGGQQRQRIAIARALVNN-----P
2yz2:A -----FAERVFDEVAFAVKNFY PDRDP-----VPLVKKAMEFVGLDFDSFKDRVPF-----FLSGGEKRRVAIASVIVHE-----P
1l2t:A -----PLLTAL ENVELPLIFKYRGAMSG-----EERRKRALECLKMAELEERFANHKPN-----QLSGGQQRVAIARALANN-----P

```

|          |                                                                                                                  |
|----------|------------------------------------------------------------------------------------------------------------------|
| 3zth:Ass | HHH-----HHHHHHHH--EEE--EEHHH-----HH-----HHHHHHHHHHHHHHHH-----                                                    |
| 3zth:A   | XNRHINLNCGQVEYHLENLPLTLDQLLTKNFSPFFAIENKNLSFE-----WV-----SNIDKLSLFLEXLDHLLSQ---TTE                               |
| 1wlw:Ass | -----HHHHHHHH-HHHHHHH-----HHHHHHH-EEEE-EEEE-----HHHHHHHHHHHHHHHHHHHH-----                                        |
| 1wlw:A   | -----QSPVELSRMFTFDYVSDH-----LDAYRELTGNASLTKYHATPPLKRFK-DMEYLSGGEKTVAAALALLFAINSYQP-----S                         |
| 4i99:A   | -----SPLERRLLIDDISGIKEKKNVFXRTFEAISRNFSSEIFAKLSPGGSARLILENPEDPFSGGLEIEAKPAGKDVKRIEAXSGGEKALTALAFVFAIQKF-KP-----A |
| 1vpl:A   | -----RNMQGI EYLR FVAGFYASSSE-----IEMVERATEIAGLGEKIKDRVST-----YSKGMVRRLLIARALMVN-----P                            |
| 2onk:A   | -----PHLSVYRNIA YGLRNVERVER-----DRRVREMAEKLGAHLLDRKPA-----RLSGGERQRVALARALVIQ-----P                              |
| 4glu:D   | -----RQALQQVMAQTDCLALAQRDYR-----VL-----SGGEQQRVQLARVLAQL-----W                                                   |
| 4hlu:C   | -----MRKRIKKVLELVGLSGLAADPL-----NL-----SGGQKQRLAIASMLARD-----T                                                   |
| 2olk:A   | -----PHMTVLNNITLAPMKVRKWPRE-----KAEAKAMELLDKVGLKKAHAYPD-----SLSGGQAQRVAIARALAME-----P                            |
| 1g6h:A   | -----G-----EL-----SGGQMKLVEIGRALMTN-----P                                                                        |
| 4fi3:C   | -----N-----QL-----SGGEQQRVRLAAVVLQITPQANPAG-----P                                                                |
| 2fgk:B   | -----AKLAGAHDFISELREGYNTIVGEQGA-----GL-----SGGQRQRIAIARALVNN-----P                                               |
| 2yz2:A   | -----FAERVFDEVAFAVKNFYPPDRDP-----VPLVKKAMEFVGLDFDSFKDRVPF-----FLSGGEKRRVAIASVIVHE-----P                          |
| 112t:A   | -----PLLTALENVELPLIFKYRGAMSG-----EERRKRALECLKMAELEERFANHKN-----QLSGGQQRVAIARALANN-----P                          |

A

Table with 3 columns: Accession number, Organism name, and Multiple sequence alignment. The alignment shows amino acid sequences for various species, with yellow highlighting indicating mapped sequence domains.

S. pyogenes Cas9
S. pyogenes Cas9 domains
A. naeslundii Cas9
A. naeslundii Cas9 domains

(7) KYYSIGL
r r r r r r
(12) LRVGI
r r r r r

Supplementary Figure S8. Distant Cas9 homologs. Compare with Figure 2. (A) Multiple sequence alignment of Cas9 distant homologs (See Supplementary Material and Methods). Sequences are denoted by Genbank identifiers and the complete organism name. Mapped sequences and domains of A. naeslundii and S. pyogenes Cas9 are shown in the last rows of the alignment with catalytic residues highlighted in yellow. For Cas9 domain description, see Supplementary Figure S4. Mapping was done manually according to HHPRED hits for Cas9 homologs shown in (B). (B) HHPRED hits for Cas9 distant homologs. Top ten hits and selected hits to Cas9, RuvC and transposase structures are shown.

|                            |                                            |                                                                                                       |
|----------------------------|--------------------------------------------|-------------------------------------------------------------------------------------------------------|
| 312126587                  | Caldicellulosiruptor hydrothermalis 108    | DPGSKMEGVSVKSS-----KA-----HTYLNQ-AYA-----VTHVKSAVET-----RRNMRRRARRY-----RK-----TRR-----               |
| 434408285                  | Stanieria cyanosphaera PCC 7437            | DPGSKREGTVTKS-----KA-----HOYLNQ-ATT-----VDVWNEHLT-----RRMRRARRP-----RK-----TPC-----                   |
| 414076241                  | Anabaena sp. 90                            | DPGKGLFSGIVAVQS-----KK-----FTLQMLHLVLP-----FKTVKDRMDQ-----RSMRNRNRGQ-----RRINRK-----LSP-----NK-----   |
| 428299778                  | Calothrix sp. PCC 6303                     | DPGKMFSSGAVAVQS-----KK-----FTLQMLHLVLP-----FKTVKDRMDQ-----RSMRNRNRGQ-----RRINRK-----LSP-----KK-----   |
| 17233043                   | Nostoc sp. PCC 7120                        | DPGKFLFSGIVAVQS-----KK-----FTLQMLHLVLP-----FKTVKDRMDQ-----RSMRNRNRGQ-----RRINRK-----LSP-----NK-----   |
| 166367654                  | Microcystis aeruginosa NIES-843            | DPGKFLFSGIVAVQS-----SL-----FTLWKAHELEP-----FKRVKERLDN-----RRLMRGRGK-----RRINRQ-----LSP-----NL-----    |
| 307150343                  | Cyanothecae sp. PCC 7822                   | DPGKFLFSGIVAVQS-----SS-----YSLMTGHELEP-----FKTVKDRMDQ-----RSMRNRNRGQ-----RRINRQ-----LSP-----NL-----   |
| 307153532                  | Cyanothecae sp. PCC 7822                   | DPGKFLFSGIVAVQS-----SS-----YSLWAGHELEP-----FKTVKDRMDQ-----RSMRNRNRGQ-----RRINRQ-----LSP-----EL-----   |
| 428306661                  | Crinalium epipsammum PCC 9333              | DPGKFLFSGIVAVQS-----SS-----FTLWKAHELEP-----FKRVKERLDN-----RRLMRGRGK-----RRINRQ-----LSP-----NC-----    |
| 307150912                  | Cyanothecae sp. PCC 7822                   | DPGKFLFSGIVAVQS-----SH-----FSLWKAHELEP-----FKRVKERLDN-----RRLMRGRGK-----RRINRQ-----LSP-----ES-----    |
| 428775289                  | Halothece sp. PCC 7418                     | QAEFNYSGIVAVQS-----SK-----FTLWKAHELEP-----FKRVKERLDN-----RRLMRGRGK-----RRINRQ-----LSP-----ES-----     |
| 428779516                  | Dactylococcopsis salina PCC 8305           | DPGKHYSGIVAVQS-----SF-----FTLWKAHELEP-----FKRVKERLDN-----RRLMRGRGK-----RRINRQ-----LSP-----ES-----     |
| 428778599                  | Dactylococcopsis salina PCC 8305           | DPGKHYSGIVAVQS-----SK-----FTLWKAHELEP-----FKRVKERLDN-----RRLMRGRGK-----RRINRQ-----LSP-----ES-----     |
| 428781696                  | Dactylococcopsis salina PCC 8305           | DPGKHYSGIVAVQS-----SQ-----FTLWKAHELEP-----FKRVKERLDN-----RRLMRGRGK-----RRINRQ-----LSP-----ES-----     |
| 428215045                  | Oscillatoria acuminata PCC 6304            | DPGKLYSGIVAVQS-----AK-----ATLWKAHELEP-----FKRVKERLDN-----RRLMRGRGK-----RRINRQ-----LSP-----ES-----     |
| 428313425                  | Microcoleus sp. PCC 7113                   | DPGKHYSGIVAVQS-----SK-----FTLWKAHELEP-----FKRVKERLDN-----RRLMRGRGK-----RRINRQ-----LSP-----ES-----     |
| 158340109                  | Acaaryochloris marina MBIC11017            | DPGKYSYSGIVAVQS-----AH-----FTLWKAHELEP-----FKRVKERLDN-----RRLMRGRGK-----RRINRQ-----LSP-----ES-----    |
| 428775002                  | Halothece sp. PCC 7418                     | DPGKYSYSGIVAVQS-----AK-----FTLWKAHELEP-----FKRVKERLDN-----RRLMRGRGK-----RRINRQ-----LSP-----ES-----    |
| 307150700                  | Cyanothecae sp. PCC 7822                   | DPGKFFSGIVAVQS-----SL-----FTLWKAHELEP-----FKRVKERLDN-----RRLMRGRGK-----RRINRQ-----LSP-----ES-----     |
| 312126663                  | Caldicellulosiruptor hydrothermalis 108    | DPGYHICLGFVVC-EL-----KGGKL-----IVYCTGILVSR-----IPEIKELITE-----RKAHRNRRNYRSCCKKRLSARQNVLTKF-----       |
| 312621424                  | Caldicellulosiruptor kronotskyensis 2002   | DPGYHICLGFVVC-EL-----RWGLV-----IVYCVGLETR-----IPEIKELITE-----RKAHRNRRNYRSCCKKRLSARQNVLTKF-----        |
| 222530402                  | Caldicellulosiruptor besicii DSM 6725      | DPGYHHIGFAVVC-EL-----RWGLV-----IVYCVGLETR-----IPEIKELITE-----RKAHRNRRNYRSCCKKRLSARQNVLTKF-----        |
| 222530431                  | Caldicellulosiruptor besicii DSM 6725      | DPGYHHIGFAVVC-EL-----RWGLV-----IVYCVGLETR-----IPEIKELITE-----RKAHRNRRNYRSCCKKRLSARQNVLTKF-----        |
| 307591386                  | Cyanothecae sp. PCC 7822                   | DPGSKTGTALVQGD-----K-----KLIWGAELIHR-----QQIKDNLIT-----RQIRRSRRN-----RK-----TRY-----                  |
| 302391131                  | Acetohalobium arabaticum DSM 5501          | DDGAKYVGVAVVQDC-----KTKN-----KVLFKAKMKQ-----QDVSAKMEE-----RRDYGRYRS-----HK-----RY-----                |
| 435854579                  | Halobacteroides halobius DSM 5150          | DDGDKVGFALVQDC-----QSKN-----KVLFKAKMKQ-----QDVSAKMEE-----RRDYGRYRS-----HK-----RY-----                 |
| 435852864                  | Halobacteroides halobius DSM 5150          | DDGDKVGFALVQDC-----QTKN-----KVLFKAVMEQR-----QDVSAKMEE-----RRDYGRYRS-----HK-----RY-----                |
| 435854272                  | Halobacteroides halobius DSM 5150          | DDGAKVGFALVQDC-----QTKN-----KVLFKAVMEQR-----QDVSAKMEE-----RRDYGRYRS-----HK-----RY-----                |
| 313123202                  | Lactobacillus delbrueckii ND02             | DTGQRHIGFAIVSQN-----K-----KVLHQSVELR-----QDVHKNLLT-----RKYRKRGRN-----RK-----TRY-----                  |
| 77362205                   | Pseudoalteromonas haloplanktis TAC125      | DTGSKHVGCAAIANG-----K-----KVIYQSEVALR-----TDVSKKMQD-----RMYRRTTRN-----RK-----LRY-----                 |
| 298675374                  | Methanohalobium evestigatum Z-7303         | DSGSKYIGCAAVAND-----K-----EMVYQSEIKLR-----DDVSKKMQD-----RADMYRNRN-----RK-----TRY-----                 |
| 298674707                  | Methanohalobium evestigatum Z-7303         | DSGSKHIGCAAVAND-----K-----EVLVYQSEVALR-----DDVSKKMQD-----RADMYRNRN-----RK-----TRY-----                |
| 298675090                  | Methanohalobium evestigatum Z-7303         | DSGSKHIGCAAVAND-----K-----EVLVYQSEVALR-----DDVSKKMQD-----RADMYRNRN-----RK-----TRY-----                |
| 169834784                  | Clostridium botulinum A3 str. Loch Maree   | DSGYNLNIGFSAITKE-----K-----NELISEGVKLL-----KMSERLKE-----KAMYRRQGRS-----R-----LRY-----                 |
| 229587454                  | Clostridium botulinum Ba4 str. 657         | DSGYNLNIGFSAITKE-----K-----NELISEGVKLL-----KMSERLKE-----KAMYRRQGRS-----R-----LRY-----                 |
| 297585104                  | Bacillus selenitireducens ML510            | DAGTKHIGFSAITKE-----K-----DVLFPDQVQLR-----TDIQDKLAT-----RRQYRSRRS-----RK-----TRY-----                 |
| 188587532                  | Natronaerobium thermophilus JW-NM-MN-LF    | DAGTKHIGFSAITKE-----K-----DVLFPDQVQLR-----TDIQDKLAT-----RRQYRSRRS-----RK-----TRY-----                 |
| 312793946                  | Caldicellulosiruptor kristjanosonii 177R1B | DIGSKVGVSAITKE-----K-----QELPSEVELR-----QDRLKLLLE-----RREHRRFRY-----RK-----TRY-----                   |
| 344996431                  | Caldicellulosiruptor lactoaceticus 6A      | DIGSKVGVSAITKE-----K-----QELPSEVELR-----QDRLKLLLE-----RREHRRFRY-----RK-----TRY-----                   |
| 210707332                  | Thermosiphon africanus TCF52B              | DIGSKTVGISAITKE-----K-----QELSMVELR-----QDRLKLLLE-----RREHRRFRY-----RK-----TRY-----                   |
| 375009168                  | Geobacillus thermoleovorans CB5 US3 UFS    | DMTRHVGISAITTK-----K-----DVLFEAQLR-----TDIVELLA-----RRYFRSRRN-----RK-----TRY-----                     |
| 407477159                  | Exiguobacterium antarcticum B7             | DAGTKHIGFSAITKE-----K-----DVLFEAQLR-----TDIVELLA-----RRYFRSRRN-----RK-----TRY-----                    |
| 172057416                  | Exiguobacterium sibiricum 25-15            | DAGTKHIGFSAITKE-----K-----DVLFEAQLR-----TDIVELLA-----RRYFRSRRN-----RK-----TRY-----                    |
| 169823684                  | Finogoldia magna ATCC 29328                | DSGSKYIGLCASTEN-----K-----KEIPSAEYELR-----NDIVKLLSS-----RRECRTRRN-----R-----LRH-----                  |
| 160902522                  | Petrotoxa mobilis SJ95                     | DAGSKYIGLCASTEN-----K-----KELFAEYELR-----NDIVKLLSS-----RRECRTRRN-----R-----LRH-----                   |
| 160902616                  | Petrotoxa mobilis SJ95                     | DAGSKYIGLCASTEN-----K-----KELFAEYELR-----NDIVKLLSS-----RRECRTRRN-----R-----LRH-----                   |
| 333978211                  | Desulfotomaculum kuznetsovii DSM 6115      | DDGSKWGVIALVNEH-----TG-----EVVFRGTIQR-----GDVVR-LLTL-----RREYRNRNY-----RL-----VRH-----                |
| 260892456                  | Ammonifex degensii KC4                     | DDGSRVYGVIALVNEH-----TG-----EVVFRGTIQR-----GDVVR-LLTL-----RREYRNRNY-----RL-----VRH-----               |
| 260893631                  | Ammonifex degensii KC4                     | DDGSRVYGVIALVNEH-----TG-----EVVFRGTIQR-----GDVVR-LLTL-----RREYRNRNY-----RL-----VRH-----               |
| 302391857                  | Acetohalobium arabaticum DSM 5501          | DPGSKTGTALVQGD-----K-----QVAFLANLHHR-----ADTIKQNLQ-----RREHRRFRS-----Q-----LKY-----                   |
| 428778981                  | Dactylococcopsis salina PCC 8305           | DPGATGTGFPAICQGE-----K-----EIIIFRMLKLR-----GGILKLSLLQ-----RADPKRGRS-----RN-----LRY-----               |
| 260892735                  | Ammonifex degensii KC4                     | DPGYEYVIGSIVRVA-----GKKE-----VVVYFAVHHR-----TDVPGKLLS-----RQARRSSRS-----RK-----TRY-----               |
| 260893993                  | Ammonifex degensii KC4                     | DPGYEYVIGSIVRVA-----GKKE-----VVVYFAVHHR-----TDVPGKLLS-----RQARRSSRS-----RK-----TRY-----               |
| 433655673                  | Thermosiphon africanus TCF52B              | DPGYEYVIGSIVRVA-----GKKE-----VVVYFAVHHR-----TDVPGKLLS-----RQARRSSRS-----RK-----TRY-----               |
| thermosacharolyticum M0795 |                                            | DPGSKVGTALVQGE-----K-----QGIIKSLDD-----RRNRRFRFN-----K-----LRY-----                                   |
| 332982963                  | Mahella australiensis 50-1 BON             | DPGSKATGVAVLADD-----T-----KAIWGLIHK-----SNIKKLKLD-----RRALSRRN-----RK-----TRY-----                    |
| 332983053                  | Mahella australiensis 50-1 BON             | DPGSKATGVAVLADD-----T-----KAIWGLIHK-----SNIKKLKLD-----RRALSRRN-----RK-----TRY-----                    |
| 222530385                  | Caldicellulosiruptor besicii DSM 6725      | DYGSRTGVILKNN-----C-----EVEFMKMLYR-----TEIKENMDR-----RSLRSRRN-----RK-----TRY-----                     |
| 298674346                  | Methanohalobium evestigatum Z-7303         | DYGSRTGVILKNN-----K-----DVIWLDVHHR-----TDIKKLLD-----RNFRRRNRN-----QN-----LRY-----                     |
| 298675173                  | Methanohalobium evestigatum Z-7303         | DYGSRTGVILKNN-----K-----DVIWLDVHHR-----TDIKKLLD-----RNFRRRNRN-----QN-----LRY-----                     |
| 292490518                  | Nitrosococcus halophilus Nc 4              | DYGSRTGVILKNN-----K-----DVIWLDVHHR-----TDIKKLLD-----RNFRRRNRN-----QN-----LRY-----                     |
| 428778759                  | Dactylococcopsis salina PCC 8305           | DPGSKVGTALVQGD-----G-----EVVWRMLHR-----GGIIKKRLQ-----RRALRRGRN-----R-----LRY-----                     |
| 300114477                  | Nitrosococcus watsonii C-113               | DPGSKVGTALVQGD-----G-----EVVWRMLHR-----GGIIKKRLQ-----RRALRRGRN-----R-----LRY-----                     |
| 292491781                  | Nitrosococcus halophilus Nc 4              | DPGSKVGTALVQGD-----G-----EVVWRMLHR-----GGIIKKRLQ-----RRALRRGRN-----R-----LRY-----                     |
| 292491869                  | Nitrosococcus halophilus Nc 4              | DPGSKVGTALVQGD-----G-----EVVWRMLHR-----GGIIKKRLQ-----RRALRRGRN-----R-----LRY-----                     |
| 292491893                  | Nitrosococcus halophilus Nc 4              | DPGSKVGTALVQGD-----G-----EVVWRMLHR-----GGIIKKRLQ-----RRALRRGRN-----R-----LRY-----                     |
| 292491036                  | Nitrosococcus halophilus Nc 4              | DPGSKVGTALVQGD-----G-----EVVWRMLHR-----GGIIKKRLQ-----RRALRRGRN-----R-----LRY-----                     |
| 292490884                  | Nitrosococcus halophilus Nc 4              | DPGSKVGTALVQGD-----G-----EVVWRMLHR-----GGIIKKRLQ-----RRALRRGRN-----R-----LRY-----                     |
| 292491492                  | Nitrosococcus halophilus Nc 4              | DPGSKVGTALVQGD-----G-----EVVWRMLHR-----GGIIKKRLQ-----RRALRRGRN-----R-----LRY-----                     |
| 297563003                  | Nocardia densonvillei DSM 43111            | DPGSKRSTGVALVRE-----K-----RBCAIPDHR-----GGIIRKGRS-----RN-----LRY-----                                 |
| 374989417                  | Streptomyces bingchengensis BCW-1          | DPGSKRSTGVALVRE-----K-----RBCAIPDHR-----GGIIRKGRS-----RN-----LRY-----                                 |
| 374989654                  | Streptomyces bingchengensis BCW-1          | DPGSKRSTGVALVRE-----K-----RBCAIPDHR-----GGIIRKGRS-----RN-----LRY-----                                 |
| 271963428                  | Streptosporangium roseum DSM 43021         | DPGSKRSTGVALVRE-----K-----RBCAIPDHR-----GGIIRKGRS-----RN-----LRY-----                                 |
| 271964894                  | Streptosporangium roseum DSM 43021         | DPGSKRSTGVALVRE-----K-----RBCAIPDHR-----GGIIRKGRS-----RN-----LRY-----                                 |
| 258511478                  | Alicyclobacillus acidocaldarius DSM 446    | APGSKTGTALVQGD-----K-----TKVWAAEQH-----GDQIRKALL-----RRMLRGRY-----RK-----TRY-----                     |
| 160902264                  | Petrotoxa mobilis SJ95                     | DPGSKITGVALVQGD-----K-----KWIWGAELIHR-----QSIKALDIT-----RQYRNRN-----K-----LRY-----                    |
| 121604978                  | Polaromonas naphthalenivorans CJ2          | DPGSKTGTALVQGD-----K-----ETIDVTGELQPTM-----HIQPLMELHR-----GATIKKSLGA-----K-----LRY-----               |
| 347754630                  | Chloracidobacterium thermophilum B         | DPGSRATGVALVRE-----K-----QVGDADTEQVRS-----HVLPLAELVHR-----GAIIRAALQ-----RAFAPRRRC-----AN-----LRH----- |
| 218667603                  | Acidithiobacillus ferrooxidans ATCC 23270  | DPGSKTGTALVQGD-----K-----ETIDVTGELQPTM-----HIQPLMELHR-----GATIKKSLGA-----K-----LRY-----               |
| 218667415                  | Acidithiobacillus ferrooxidans ATCC 23270  | DPGSKTGTALVQGD-----K-----ETIDVTGELQPTM-----HIQPLMELHR-----GATIKKSLGA-----K-----LRY-----               |
| 344201059                  | Acidithiobacillus ferrooxidans S83         | APGSKTGTALVQGD-----K-----ETIDVTGELQPTM-----HIQPLMELHR-----GATIKKSLGA-----K-----LRY-----               |
| 344201127                  | Acidithiobacillus ferrooxidans S83         | APGSKTGTALVQGD-----K-----ETIDVTGELQPTM-----HIQPLMELHR-----GATIKKSLGA-----K-----LRY-----               |
| 288940385                  | Allochromatium vinosum DSM 180             | DPGSRVGTALVRES-----ETCPDADTGAVERLE-----HGLWFGELAH-----GQAIRDALQ-----RHHLRARRS-----RK-----TRY-----     |
| 288941921                  | Allochromatium vinosum DSM 180             | DPGSRVGTALVRES-----ETCPDADTGAVERLE-----HGLWFGELAH-----GQAIRDALQ-----RHHLRARRS-----RK-----TRY-----     |
| 288940786                  | Allochromatium vinosum DSM 180             | DPGSRVGTALVRES-----ETCPDADTGAVERLE-----HGLWFGELAH-----GQAIRDALQ-----RHHLRARRS-----RK-----TRY-----     |
| 288941171                  | Allochromatium vinosum DSM 180             | DPGSRVGTALVRES-----ETCPDADTGAVERLE-----HGLWFGELAH-----GQAIRDALQ-----RHHLRARRS-----RK-----TRY-----     |
| 288941306                  | Allochromatium vinosum DSM 180             | DPGSRVGTALVRES-----ETCPDADTGAVERLE-----HGLWFGELAH-----GQAIRDALQ-----RHHLRARRS-----RK-----TRY-----     |
| 121582913                  | Polaromonas naphthalenivorans CJ2          | DPGSKTGTALVREB-----AE-----KNGV-----AVINLPELHR-----GQISEALTA-----RHRMRRS-----H-----LRY-----            |
| 121604604                  | Polaromonas naphthalenivorans CJ2          | DPGSKTGTALVREB-----AE-----KNGV-----AVINLPELHR-----GQISEALTA-----RHRMRRS-----H-----LRY-----            |
| 91791204                   | Polaromonas sp. JS666                      | DPGSKTGTALVREB-----AE-----KNGV-----AVINLPELHR-----GQISEALTA-----RHRMRRS-----H-----LRY-----            |
| 91791283                   | Polaromonas sp. JS666                      | DPGSKTGTALVREB-----AE-----KNGV-----AVINLPELHR-----GQISEALTA-----RHRMRRS-----H-----LRY-----            |
| 121582916                  | Polaromonas naphthalenivorans CJ2          | DPGSRATGVALVREI-----ETIPEPAMGVTG-----AVSLLELHR-----GQISEALTA-----RQYRNRN-----Q-----LRY-----           |
| 121582983                  | Polaromonas naphthalenivorans CJ2          | DPGSRATGVALVREI-----ETIPEPAMGVTG-----AVSLLELHR-----GQISEALTA-----RQYRNRN-----Q-----LRY-----           |
| 428304158                  | Crinalium epipsammum PCC 9333              | DPGSKVGTALVQGD-----K-----RVTALLSHR-----QQIKNALS-----RRALRRGRN-----RK-----TRY-----                     |
| 428204921                  | Chroococcidiopsis thermalis PCC 7203       | DPGSKVGTALVQGD-----K-----RVTALLSHR-----QQIKNALS-----RRALRRGRN-----RK-----TRY-----                     |
| 307153539                  | Cyanothecae sp. PCC 7822                   | DPGAKTGTALVQGD-----K-----RVTALLSHR-----QQIKNALS-----RRALRRGRN-----RK-----TRY-----                     |
| 428216193                  | Oscillatoria acuminata PCC 6304            | DPGAKTGTALVQGD-----K-----RVTALLSHR-----QQIKNALS-----RRALRRGRN-----RK-----TRY-----                     |
| 414079584                  | Anabaena sp. 90                            | DPGAKTGTALVQGD-----K-----RVTALLSHR-----QQIKNALS-----RRALRRGRN-----RK-----TRY-----                     |
| 172055147                  | Cyanothecae sp. ATCC 51142                 | DPGAKTGTALVQGD-----K-----RVTALLSHR-----QQIKNALS-----RRALRRGRN-----RK-----TRY-----                     |
| 428316510                  | Oscillatoria nigro-viridis PCC 7112        | DPGAKTGTALVQGD-----K-----RVTALLSHR-----QQIKNALS-----RRALRRGRN-----RK-----TRY-----                     |
| 428314951                  | Oscillatoria nigro-viridis PCC 7112        | DPGAKTGTALVQGD-----K-----RVTALLSHR-----QQIKNALS-----RRALRRGRN-----RK-----TRY-----                     |
| 307591386                  | Cyanothecae sp. PCC 7822                   | DPGAKTGTALVQGD-----K-----RVTALLSHR-----QQIKNALS-----RRALRRGRN-----RK-----TRY-----                     |
| 75812341                   | Anabaena variabilis ATCC 29413             | DPGAKTGTALVQGD-----K-----RVTALLSHR-----QQIKNALS-----RRALRRGRN-----RK-----TRY-----                     |
| 17232293                   | Nostoc sp. PCC 7120                        | DPGAKTGTALVQGD-----K-----RVTALLSHR-----QQIKNALS-----RRALRRGRN-----RK-----TRY-----                     |
| 75812342                   | Anabaena variabilis ATCC 29413             | DPGAKTGTALVQGD-----K-----RVTALLSHR-----QQIKNALS-----RRALRRGRN-----RK-----TRY-----                     |
| 434407609                  | Cylindrospermum stagnale PCC 7417          | DPGAKTGTALVQGD-----K-----RVTALLSHR-----QQIKNALS-----RRALRRGRN-----RK-----TRY-----                     |
| 414078405                  | Anabaena sp. 90                            | DPGAKTGTALVQGD-----K-----RVTALLSHR-----QQIKNALS-----RRALRRGRN-----RK-----TRY-----                     |
| 404685156                  | Anabaena cylindrica PCC 7122               | DPGAKTGTALVQGD-----K-----RVTALLSHR-----QQIKNALS-----RRALRRGRN-----RK-----TRY-----                     |
| 428315656                  | Oscillatoria nigro-viridis PCC 7112        | DPGAKTGTALVQGD-----K-----RVTALLSHR-----QQIKNALS-----RRALRRGRN-----RK-----TRY-----                     |
| 428204926                  | Chroococcidiopsis thermalis PCC 7203       | DPGAKTGTALVQGD-----K-----RVTALLSHR-----QQIKNALS-----RRALRRGRN-----RK-----TRY-----                     |
| 218440244                  | Cyanothecae sp. PCC 7424                   | DPGAKTGTALVQGD-----K-----RVTALLSHR-----QQIKNALS-----RRALRRGRN-----RK-----TRY-----                     |
| 428775092                  | Halothece sp. PCC 7418                     | DPGAKTGTALVQGD-----K-----RVTALLSHR-----QQIKNALS-----RRALRRGRN-----RK-----TRY-----                     |
| 414075475                  | Anabaena sp. 90                            | DPGAKTGTALVQGD-----K-----RVTALLSHR-----QQIKNALS-----RRALRRGRN-----RK-----TRY-----                     |
| 428305120                  | Crinalium epipsammum PCC 9333              | DPGAKTGTALVQGD-----K-----RVTALLSHR-----QQIKNALS-----RRALRRGRN-----RK-----TRY-----                     |
| 427713881                  | Synechococcus sp. PCC 6312                 | DPGAKTGTALVQGD-----K-----RVTALLSHR-----QQIKNALS-----RRALRRGRN-----RK-----TRY-----                     |

S. pyogenes Cas9  
S. pyogenes Cas9 domains  
A. naeslundii Cas9  
A. naeslundii Cas9 domains

DIGTNSVGVAVTDE-----YKVPKPKFVLTGNTDRHSIKKNLIGALLFDS-----GET-----AEA-----TLKRTARRR-----YT-----RR-----  
VGTHTSVGLATLRVDDHGTP1-----ELLALSISHDGSVGKGGKDDHTRKLS-----GIARARLL-----HH-----RR-----











312126587 Caldicellulosiruptor hydrothermalis 108 HRRQLHMLQFDKGGIRRRYGGTR-S-LGFKRGSYVHKPKYG-----LCYVGGHMG-----

434408285 Stanieria cyanosphaera PCC 7437 HRRQLHRLHAPGAIKRRSPYGGTM-S-AGFKRSLVHKPKYN-----LCFVGGSSKG-----

414076241 Anabaena sp. 90 SRRLHLMVTPKSGGIRRRYGGTT-TRHGFRKGDVVEATQGS-----KTFPGWVSGD-----

428299778 Calothrix sp. PCC 6303 SRRLHLMVTPKSGGIRRRYGGTT-TRHGFRKGDVVEATQGS-----KTFPGWVSGD-----

17233043 Nostoc sp. PCC 7120 SRRLHLMVTPKSGGIRRRYGGTT-TRHGFRKGDVVEATQGS-----IGYVSGD-----

166363864 Microcystis aeruginosa NIES-843 SRRLHLMVTPKSGGIRRRYGGTT-TRHGFRKGDVVEATQGS-----IGYVSGD-----

166367659 Microcystis aeruginosa NIES-843 SRRLHLMVTPKSGGIRRRYGGTT-TRHGFRKGDVVEATQGS-----IGYVSGD-----

307150343 Cyanothera sp. PCC 7822 SRRLHLMVTPKSGGIRRRYGGTT-TRHGFRKGDVVEATQGS-----IGYVSGD-----

307153352 Cyanothera sp. PCC 7822 SRRLHLMVTPKSGGIRRRYGGTT-TRHGFRKGDVVEATQGS-----IDYVSGQ-----

428306661 Crinalium epipsammum PCC 9333 SRRLHLMVTPKSGGIRRRYGGTT-TRHGFRKGDVVEATQGS-----IGYVSGQ-----

307150912 Cyanothera sp. PCC 7822 SRRLHLMVTPKSGGIRRRYGGTT-TRHGFRKGDVVEATQGS-----IGYVSGQ-----

428775289 Halothece sp. PCC 7418 SRRLHLMVTPKSGGIRRRYGGTT-TRHGFRKGDVVEATQGS-----IKYRGSWVSGD-----

428779516 Dactylococcopsis salina PCC 8305 SRRLHLMVTPKSGGIRRRYGGTT-TRHGFRKGDVVEATQGS-----IKYRGSWVSGD-----

428778599 Dactylococcopsis salina PCC 8305 SRRLHLMVTPKSGGIRRRYGGTT-TRHGFRKGDVVEATQGS-----VKFRGSWVSGD-----

428781696 Dactylococcopsis salina PCC 8305 SRRLHLMVTPKSGGIRRRYGGTT-TRHGFRKGDVVEATQGS-----VKFRGSWVSGD-----

428215045 Oscillatoria acuminata PCC 6304 SRRLHLMVTPKSGGIRRRYGGTT-TRHGFRKGDVVEATQGS-----RVCMGSWVSGD-----

428313425 Microcoleus sp. PCC 7113 SRRLHLMVTPKSGGIRRRYGGTT-TRHGFRKGDVVEATQGS-----RVCMGSWVSGD-----

158340109 Acaryochloris marina MBIC11017 FRRQLHPEIPQNGVRRKRGTTI-TWVFRSGDLVRAEKAG-----KVFGRWVGGY-----

428775002 Halothece sp. PCC 7418 FRRQLHPEIPQNGVRRKRGTTI-TWVFRSGDLVRAEKAG-----TESIGYGGY-----

307150700 Cyanothera sp. PCC 7822 SRRLHLMVTPKSGGIRRRYGGTT-TRHGFRKGDVVEATQGS-----IGYVSGQ-----

312126663 Caldicellulosiruptor hydrothermalis 108 --RLYKNGKIVAKNRRRTDQKEPSPADISPLPEIQRLK-----VYPGTKILNLRKREPTTI-AGDVWVHE-----PTGKRFVITGVVGSQ--Y

428214224 Caldicellulosiruptor kronotskyensis 2002 --RLYKVDGKIVAKNRRRTDQKEPSPADISPLPEIQRLK-----VYPGTKILNLRKREPTTI-AGDVWVHE-----PTGKRFVITGVVGSQ--Y

222530402 Caldicellulosiruptor bescii DSM 6725 --RLYKVDGKIVAKNRRRTDQKEPSPADISPLPEIQRLK-----VYPGTKILNLRKREPTTI-AGDVWVHE-----PTGKRFVITGVVGSQ--Y

222530412 Caldicellulosiruptor bescii DSM 6725 --RLYKVDGKIVAKNRRRTDQKEPSPADISPLPEIQRLK-----VYPGTKILNLRKREPTTI-AGDVWVHE-----PTGKRFVITGVVGSQ--Y

307591386 Cyanothera sp. PCC 7822 -----GFP-----IRHRSRNKPYGK-----FQTGAQVKAVVTKGKK-----VGVYVGR-----V-LCR-ASGRF----D

302391131 Acetohalobium arabaticum DSM 5501 -----GFP-----FKHRDVRVYIKRGGTT-----VLGY-----ITLAR-VKRNKYSKVCN-----

435854579 Halobacteroides halobius DSM 5150 -----GFP-----FKHRDVRVYIKRGGTT-----YDGY-----ITSLR-IKNNKYSKVCN-----

435852864 Halobacteroides halobius DSM 5150 -----GFP-----FRQRLDLVKYTKRNGET-----YTYG-----ITSLR-IKNNKYSKVCN-----

435854272 Halobacteroides halobius DSM 5150 -----GFP-----FRQRLDLVKYTKRNGET-----YTYG-----ITSLR-IKNNKYSKVCN-----

313123202 Lactobacillus delbrueckii NDO2 -----GKRKQPMNSKRNEKNTKYACG-----LWNLVDYVRVI-----GNHVKGY-----VKGFK-SNGYVV--Y

77362205 Pseudoalteromonas haloplanktis TAC125 -----GQR-----SEKRIPTGKLFPG-----LKKHDFVETPPQ-----TGKVGK-----R-SSGYF--A

298675374 Methanohalobium evestigatum Z-7303 -----GVR-----SEKKIPTGKLFPG-----LKKHDFVETPPQ-----TGKVGK-----R-TSGNF--S

298674707 Methanohalobium evestigatum Z-7303 -----GIR-----SDKLIPTGKLFPG-----LKKHDFVETPPQ-----TGKVGK-----R-TSGNF--S

298675090 Methanohalobium evestigatum Z-7303 -----GVR-----SEKKIPTGKLFPG-----LKKHDFVETPPQ-----TGKVGK-----R-TSGNF--S

169834784 Clostridium botulinum A3 str. Loch Maree -----KVID-----IRNTKVSQAEPLNRRTRNKLNSENLRKRVGKQRRIRTKRYF-----VQPGDLVKYEDK-----VYTVKGT-----Q-MKGY--I

222587544 Clostridium botulinum Ba4 str. 657 -----KVID-----IRNTKVSQAEPLNRRTRNKLNSENLRKRVGKQRRIRTKRYF-----VQPGDLVKYEDK-----IYTVKGT-----I-MKGY--I

297585104 Bacillus selenitireducens MLS10 -----KGGI-----RKANKAERFVKG-----PQLFDKVLCEQO-----PCFIPGR-----R-KTGSF--D

188587532 Natranaerobius thermophilus JW-NM-WN-LF -----KGGI-----RKANKAPYLKVG-----FRLFDKVLVNNR-----KCFIPGR-----R-KSGYF--D

312793946 Caldicellulosiruptor kristjanssonii 177R1B -----KGG-----RKANPVTVKEVHG-----FRFRPDKIEYQGG-----TYIIFGL-----R-SSGYF--A

344996431 Caldicellulosiruptor lactoaceticus 6A -----KGG-----KRFPVTVKREVHG-----FRFRPDKIEYQGG-----TYIIFGL-----R-SSGYF--A

217077332 Methanohalobium evestigatum TCF52B -----KGG-----KRPVTVKREVHG-----FRFRPDKIEYQGG-----TYIIFGL-----R-SSGYF--D

375009166 Geobacillus thermoleovorans CB US3 UP5 -----KGGK-----RKANKAERFVKG-----VQLFDKVLVYERK-----ECFIPGR-----R-SSGYF--D

407477159 Exiguobacterium antarcticum B7 -----KGGK-----RKANKAERLIVHG-----VQLFDKVLVYERK-----TCFVFR-----R-KNGYF--D

172057416 Exiguobacterium sibiricum 255-15 -----KGGK-----RKANKAERLIVHG-----VQLFDKVLVYERK-----TCFVFR-----R-KNGYF--D

169823684 Finegoldia magna ATCC 29328 -----KGGI-----KKNQAPYLKVG-----FRLFDKVLVYERK-----EYFIPGR-----R-SSGYF--H

169902522 Petrotoga mobilis SJ95 -----KGGI-----KKNQAPYLKVG-----FRLFDKVLVYERK-----ECFIPGR-----R-STGYF--D

169902616 Petrotoga mobilis SJ95 -----KGGT-----KKNQAPYLKVG-----FRLFDKVLVYERK-----ECFIPGR-----R-STGYF--D

333978211 Desulfotomaculum kuznetsovii DSM 6115 -----GNP-----TKTCEERSG-----FQHWDIVRA-ERAGRR-----VFGC-----V-RSL-KARAM---T

260892456 Ammonifex degensii KC4 -----GNP-----TKTCEBKNG-----FRHWDIVRA-VRAGKV-----VFGC-----V-RSL-KARAM---T

260893631 Ammonifex degensii KC4 -----GNP-----TKTCEBKNG-----FRHWDIVRA-VRAGKV-----VFGC-----V-RSL-KARAM---T

302391857 Acetohalobium arabaticum DSM 5501 -----GFP-----RAYRSRNKYVDN-----FKTGLDVKAVIPKGN-----KGVYFR-----V-STR-KSGYF--R

428778981 Dactylococcopsis salina PCC 8305 -----GFPALNKNDQIPKPKTYTH-----CEAGMDIUVKLNRRKTTV-----RAGIYKGR-----V-KTP-TPKGF--E

260892735 Ammonifex degensii KC4 -----GFP-----RGHRAEKVHFSG-----FATGLDVRAEVPKNGY-----AGRYVGR-----V-AVR-RSGYF--D

260893993 Ammonifex degensii KC4 -----GFP-----RGHRAEKIHSN-----FMTGDLVAEVPAGRY-----AGRYVGR-----V-AVR-RSGYF--D

433655673 Thermoaerobacterium thermosaccharolyticum M0795 -----GFP-----RAYLSRQKEYFN-----FQNGDYVKAIEVPKGY-----KGQYTG-----V-AVR-KSGYF--D

332982963 Mahella australiensis 50-1 BON -----GFP-----KGYRNRKQYFNG-----FQNGDYVKAIEVPKGY-----QGNFTGR-----V-AVR-KSGYF--D

332983053 Mahella australiensis 50-1 BON -----GFP-----KGYRNRKQYFNG-----FQNGDYVKAIEVPKGY-----QGNFTGR-----V-AVR-KSGYF--D

222530385 Caldicellulosiruptor bescii DSM 6725 -----GFP-----RGHTRKPKFFYG-----FQGDMDVKAIVTKGKK-----KGTWVGR-----V-SCR-NSGYF--D

298674346 Methanohalobium evestigatum Z-7303 -----GFP-----RKAPPRKIYIFG-----FQSDIILKAVIENKGY-----KGTWVGR-----V-SCR-NSGYF--D

298675173 Methanohalobium evestigatum Z-7303 -----GFP-----RKAPPRKIYIFG-----FQSDIILKAVIENKGY-----KGTWVGR-----V-SCR-NSGYF--D

292490518 Nitrosococcus halophilus Nc 4 -----GFP-----RTSAAKAARTVQO-----FRGTDIIVKAVIENKGY-----AGHYLGR-----V-AVR-SSGYF--N

428778759 Dactylococcopsis salina PCC 8305 -----GYP-----IKHRP-LRPIQG-----FQTDIIVQVNDIPKGN-----QGWQVGR-----L-CFY-SDNC--E

300114477 Nitrosococcus watsonii C-113 -----GFP-----RGKAECRCRIVG-----FQTDLDVRLIQPKGY-----AGHYLGR-----LAGIR-ARGTF--D

292491781 Nitrosococcus halophilus Nc 4 -----GFP-----RGKAECRCRIVG-----FQTDLDVRLIQPKGY-----AGHYLGR-----LAGIR-ARGTF--D

292491869 Nitrosococcus halophilus Nc 4 -----GFP-----RGKAECRCRIVG-----FQTDLDVRLIQPKGY-----AGHYLGR-----LAGIR-ARGTF--D

292491893 Nitrosococcus halophilus Nc 4 -----GFP-----RGKAECRCRIVG-----FQTDLDVRLIQPKGY-----AGHYLGR-----LAGIR-ARGTF--D

292491036 Nitrosococcus halophilus Nc 4 -----GFP-----RGKAECRCRIVG-----FQTDLDVRLIQPKGY-----AGHYLGR-----LAGIR-ARGTF--D

292490884 Nitrosococcus halophilus Nc 4 -----GFP-----RGKAECRCRIVG-----FQTDLDVRLIQPKGY-----AGHYLGR-----LAGIR-ARGTF--D

292491492 Nitrosococcus halophilus Nc 4 -----GFP-----RGKAECRCRIVG-----FQTDLDVRLIQPKGY-----AGHYLGR-----LAGIR-ARGTF--D

297563003 Nocardiopeps dasonvillei DSM 4311 -----GFP-----RLRLPRKPFPG-----FQTDLDVRLIQPKGY-----AGHYLGR-----LAGIR-ARGTF--D

374989417 Streptomyces bingchenggensis BCW-1 -----GFP-----RRTSPRIKTVHG-----YATGDLVAVIENKGY-----TGHVGR-----V-MIR-TTGRF--D

374989654 Streptomyces bingchenggensis BCW-1 -----GFP-----RRTSPRIKTVHG-----YATGDLVAVIENKGY-----TGHVGR-----V-MIR-TTGRF--D

271963428 Streptosporangium roseum DSM 43021 -----GFP-----RLVRFPRKLVHG-----FQTDLDVRLIQPKGY-----AGHYLGR-----LAGIR-ARGTF--D

271964894 Streptosporangium roseum DSM 43021 -----GFP-----RLVRFPRKLVHG-----FQTDLDVRLIQPKGY-----AGHYLGR-----LAGIR-ARGTF--D

258511478 Alicyclobacillus acidocaldarius DSM 446 -----GFP-----RSHAPSSRYMG-----FQTDLDVRLIQPKGY-----AGHYLGR-----LAGIR-ARGTF--D

169902264 Petrotoga mobilis SJ95 -----GFP-----KHTAPPRKTYMG-----YKTDIIVLAVIENKGY-----MGIHGR-----I-AVR-HRPSF--L

121604978 Polaromonas naphthalenivorans CJ2 -----GFP-----RTYLTHQKTAFG-----FKTGDVRLIIVTKGKK-----KGIHGR-----V-AVR-LTGSF--N

347754630 Chloracidobacterium thermophilum B -----GFP-----RGDLTRKSFAFG-----FQTDLDVRLIIVTKGKK-----AGNYLGR-----V-AVR-ASGSF--N

218667603 Acidithiobacillus ferrooxidans ATCC 23270 -----GFP-----RGVLTSSKSAFG-----FQTDMDVKAIVTKGKK-----VGYLGR-----V-AVR-ASGSF--N

218667415 Acidithiobacillus ferrooxidans ATCC 23270 -----GFP-----RGVLTSSKSAFG-----FQTDMDVKAIVTKGKK-----VGYLGR-----V-AVR-ASGSF--N

344201059 Acidithiobacillus ferrooxidans S83 -----GFP-----RGVLTSSKSAFG-----FQTDMDVKAIVTKGKK-----VGYLGR-----V-AVR-ASGSF--N

344201127 Acidithiobacillus ferrooxidans S83 -----GFP-----RGVLTSSKSAFG-----FQTDMDVKAIVTKGKK-----VGYLGR-----V-AVR-ASGSF--N

288940385 Allochromatium vinosum DSM 180 -----GFP-----RGVLTSSKSAFG-----FQTDMDVKAIVTKGKK-----VGYLGR-----V-AVR-RTGSF--N

288941921 Allochromatium vinosum DSM 180 -----GFP-----RGVLMRHKRVHG-----FQTDMDVKAIVTKGKK-----VGYLGR-----V-AVR-RTGSF--N

288940786 Allochromatium vinosum DSM 180 -----GFP-----RGVLMRHKRVHG-----FQTDMDVKAIVTKGKK-----VGYLGR-----V-AVR-RTGSF--N

288941171 Allochromatium vinosum DSM 180 -----GFP-----RGVLMRHKRVHG-----FQTDMDVKAIVTKGKK-----VGYLGR-----V-AVR-RTGSF--N

288941306 Allochromatium vinosum DSM 180 -----GFP-----RGVLMRHKRVHG-----FQTDMDVKAIVTKGKK-----VGYLGR-----V-AVR-RTGSF--N

121582913 Polaromonas naphthalenivorans CJ2 -----GSA-----RGVLTSSKSIQG-----FQTDMDVKAIVTKGKK-----TGIHGR-----V-AVR-ASGSF--N

121604604 Polaromonas naphthalenivorans CJ2 -----GSA-----RGVLTSSKSIQG-----FQTDMDVKAIVTKGKK-----TGIHGR-----V-AVR-ASGSF--N

91791204 Polaromonas sp. JS666 -----GFP-----RGVLMRHKRVHG-----FQTDMDVKAIVTKGKK-----VGYLGR-----V-AVR-ASGSF--N

91791283 Polaromonas sp. JS666 -----GFP-----RGVLMRHKRVHG-----FQTDMDVKAIVTKGKK-----VGYLGR-----V-AVR-ASGSF--N

121582916 Polaromonas naphthalenivorans CJ2 -----GFP-----RGVLMRHKRVHG-----FQTDMDVKAIVTKGKK-----VGYLGR-----V-AVR-ASGSF--N

121582983 Polaromonas naphthalenivorans CJ2 -----GFP-----RGVLMRHKRVHG-----FQTDMDVKAIVTKGKK-----VGYLGR-----V-AVR-ASGSF--N

428304158 Crinalium epipsammum PCC 9333 -----GFP-----KHAHSAKFFMG-----FTGDMVKANIPKTKG-----AGKVVGR-----I-AVR-FRPFK--V

428204921 Chroococcidiopsis thermalis PCC 7203 -----GFP-----IRHRSNVHFG-----FRTNVKAIVTSKGGK-----VGYVGR-----V-LCR-KTGSF--D

307153539 Cyanothera sp. PCC 7822 -----GFP-----IRHRSIKIHKHG-----FQTDIIVKAVIENKGY-----IGIAGR-----V-LCR-ASGSF--D

428216193 Oscillatoria acuminata PCC 6304 -----GFA-----FKRHRPQRYVFFG-----FKTGDIVLADIIPKGGK-----AGRYLGR-----L-ACR-TSGRF--N

414079584 Anabaena sp. 90 -----GFP-----CTEPPKIFTH-----VSTGDFVKATLHKDRKNI-TSGKYVSR-----V-KTP-TKNGC--E

172055147 Cyanothera sp. ATCC 51142 -----GFP-----TRVPHKVDVHG-----FQTDIIVKAVIENKGY-----TGIYVGR-----V-AVR-STGSF--N

428316510 Oscillatoria nigro-viridis PCC 7112 -----GFP-----VKHTRCKTFTH-----FQTDMDVKAIVTKGKK-----VGYLGR-----L-IVR-ESGVF--E

428314951 Oscillatoria nigro-viridis PCC 7112 -----GFP-----TRHTRCKEFPF-----FKTGDIVLADIIPKGGK-----AGRYLGR-----L-IVR-ASGVF--E

307591386 Cyanothera sp. PCC 7822 -----GFP-----IRHRSRNKPYGK-----FQTDIIVKAVIENKGY-----VGVYVGR-----V-LCR-ASGRF--D

75812341 Anabaena variabilis ATCC 29413 -----GLP-----VHCSRTKPFHG-----FQTDIIVKAVIENKGY-----VGVYVGR-----I-ATR-ATGSF--N

17233293 Nostoc sp. PCC 7120 -----GFP-----TRHCSRTKPFHG-----FQTDIIVKAVIENKGY-----VGVYVGR-----I-ATR-ATGSF--N

75812782 Anabaena variabilis ATCC 29413 -----GFP-----IRHRSRNKPYGK-----FQTDIIVKAVIENKGY-----VGVYVGR-----I-ATR-ATGSF--N

434407609 Cylinidrospermum stagnale PCC 7417 -----GFP-----SRVPRKVLVIG-----FQTDIIVKAVIENKGY-----VGVYVGR-----I-ATR-ATGSF--N

414078405 Anabaena sp. 90 -----GFP-----SRVPRKVLVIG-----FQTDIIVKAVIENKGY-----VGVYVGR-----I-ATR-ATGSF--N

44985156 Anabaena cylindrica PCC 7122 -----GFP-----SRVPRKVLVIG-----FQTDIIVKAVIENKGY-----VGVYVGR-----I-ATR-ATGSF--N

428315656 Oscillatoria nigro-viridis PCC 7112 -----GFP-----TRHRSKQIHLG-----FKTGDIVLADIIPKGGK-----AGRYLGR-----I-LCR-ASGSF--D

428204926 Chroococcidiopsis thermalis PCC 7203 -----GFP-----TRHRSKAIIHKHG-----FKTGDIVLADIIPKGGK-----AGRYLGR-----V-LCR-KSGSF--D

218440244 Cyanothera sp. PCC 7424 -----GFP-----SRVPRKVLVIG-----FQTDIIVKAVIENKGY-----VGVYVGR-----V-AVR-STGSF--N

428775092 Halothece sp. PCC 7418 -----GFP-----KHAHSAKFFMG-----FQTDIIVKAVIENKGY-----VGVYVGR-----V-LCR-ASGSF--D

414075475 Anabaena sp. 90 -----GFP-----SRVPRKVLVIG-----FQTDIIVKAVIENKGY-----VGVYVGR-----V-AVR-ATGSF--N

428305120 Crinalium epipsammum PCC 9333 -----GFP-----TRHRTIHKHG-----FQTDIIVKAVIENKGY-----VGVYVGR-----V-LCR-ATGSF--D

427713881 Synechococcus sp. PCC 6312 -----GFS-----TRHRSVQIHKHG-----FQTDIVRATVITAGKK-----IGYVGR-----V-LCR-ASGSF--D

312126587 Caldicellulosiruptor hydrothermalis 108  
434408285 Stanieria cyanosphaera PCC 7437  
414076241 Anabaena sp. 90  
428299778 Calothrix sp. PCC 6303  
17233043 Nostoc sp. PCC 7120  
166363864 Microcystis aeruginosa NIES-843  
166367659 Microcystis aeruginosa NIES-843  
307150343 Cyanothece sp. PCC 7822  
307153352 Cyanothece sp. PCC 7822  
428306661 Crinalium epipsammum PCC 9333  
307150912 Cyanothece sp. PCC 7822  
428775289 Halothece sp. PCC 7418  
428779516 Dactylococcopsis salina PCC 8305  
428778599 Dactylococcopsis salina PCC 8305  
428781696 Dactylococcopsis salina PCC 8305  
428215045 Oscillatoria acuminata PCC 6304  
428313425 Microcoleus sp. PCC 7113  
158340109 Acaryochloris marina MBIC11017  
428775002 Halothece sp. PCC 7418  
307150700 Cyanothece sp. PCC 7822

312126663 Caldicellulosiruptor hydrothermalis 108  
312621424 Caldicellulosiruptor kronotskensis 2002  
222530402 Caldicellulosiruptor bescii DSM 6725  
222530431 Caldicellulosiruptor bescii DSM 6725

307591386 Cyanothece sp. PCC 7822  
302391131 Acetohalobium arabaticum DSM 5501  
435854579 Halobacteroides halobius DSM 5150  
435852864 Halobacteroides halobius DSM 5150  
435854272 Halobacteroides halobius DSM 5150  
313123202 Lactobacillus delbrueckii ND02  
77362205 Pseudoalteromonas halopantkitis TAC125  
298675374 Methanohalobium evestigatum Z-7303  
298674707 Methanohalobium evestigatum Z-7303  
298675090 Methanohalobium evestigatum Z-7303  
169834784 Clostridium botulinum A3 str. Loch Maree  
229587454 Clostridium botulinum Ba4 str. 657

297585104 Bacillus selenitireducens MLS10  
188587532 Natranaerobius thermophilus JW-NM-WF-LF  
312793946 Caldicellulosiruptor kristjanssonii 177R1B  
344996431 Caldicellulosiruptor lactoaceticus 6A  
217077332 Thermosiphon africanus TCF52B  
375009168 Geobacillus thermoleovorans CB US3 UP5  
407477159 Exiguobacterium antarcticum B7  
172057416 Exiguobacterium antarcticum 255-15  
169823684 Finegoldia magna ATCC 29328  
160902522 Petrotoga mobilis S195  
160902616 Petrotoga mobilis S195

333978211 Desulfotomaculum kuznetsovii DSM 6115  
260892456 Ammonifex degensii KC4  
260893631 Ammonifex degensii KC4  
302391857 Acetohalobium arabaticum DSM 5501  
428778981 Dactylococcopsis salina PCC 8305  
260892735 Ammonifex degensii KC4  
260893993 Ammonifex degensii KC4  
433656673 Thermoanaerobacterium

thermosaccharolyticum M0795  
332982963 Mahella australiensis 50-1 BON  
332983053 Mahella australiensis 50-1 BON  
222530385 Caldicellulosiruptor bescii DSM 6725  
298674346 Methanohalobium evestigatum Z-7303  
298675173 Methanohalobium evestigatum Z-7303  
292490518 Nitrosococcus halophilus Nc 4  
428778759 Dactylococcopsis salina PCC 8305  
300114477 Nitrosococcus watonii C-113  
292491781 Nitrosococcus halophilus Nc 4  
292491869 Nitrosococcus halophilus Nc 4  
292491893 Nitrosococcus halophilus Nc 4  
292491036 Nitrosococcus halophilus Nc 4  
292490884 Nitrosococcus halophilus Nc 4  
292491492 Nitrosococcus halophilus Nc 4  
297563003 Nocardiosis dasonvillei DSM 43111  
374989417 Streptomyces bingchengensis BCW-1  
374989654 Streptomyces bingchengensis BCW-1  
271963428 Streptosporangium roseum DSM 43021  
271964894 Streptosporangium roseum DSM 43021  
258511478 Alicyclobacillus acidocaldarius DSM 446  
160902264 Petrotoga mobilis S195

121604978 Polaromonas naphthalenivorans CJ2  
347754630 Chloracidobacterium thermophilum B  
218667603 Acidithiobacillus ferrooxidans ATCC 23270  
218667415 Acidithiobacillus ferrooxidans ATCC 23270  
344201059 Acidithiobacillus ferrooxidans SS3  
344201127 Acidithiobacillus ferrooxidans SS3  
288940385 Allochromatium vinosum DSM 180  
288941921 Allochromatium vinosum DSM 180  
288940786 Allochromatium vinosum DSM 180  
288941171 Allochromatium vinosum DSM 180  
288941306 Allochromatium vinosum DSM 180  
121582913 Polaromonas naphthalenivorans CJ2  
121604604 Polaromonas naphthalenivorans CJ2  
91791204 Polaromonas sp. JS666  
91791283 Polaromonas sp. JS666  
121582916 Polaromonas naphthalenivorans CJ2  
121582983 Polaromonas naphthalenivorans CJ2  
428304158 Crinalium epipsammum PCC 9333  
428204921 Chromococcidiopsis thermalis PCC 7203  
307153539 Cyanothece sp. PCC 7822  
428216193 Oscillatoria acuminata PCC 6304  
414079584 Anabaena sp. 90  
172055147 Cyanothece sp. ATCC 51142  
428316510 Oscillatoria nigro-viridis PCC 7112  
428314951 Oscillatoria nigro-viridis PCC 7112  
307591386 Cyanothece sp. PCC 7822  
75812341 Anabaena variabilis ATCC 29413  
17233293 Nostoc sp. PCC 7120  
75812782 Anabaena variabilis ATCC 29413  
434407609 Cylinndrosperrum stagnale PCC 7417  
414078405 Anabaena sp. 90  
44068156 Anabaena cylindrica PCC 7122  
428315656 Oscillatoria nigro-viridis PCC 7112  
428204926 Chromococcidiopsis thermalis PCC 7203  
218440244 Cyanothece sp. PCC 7424  
428775092 Halothece sp. PCC 7418  
414075475 Anabaena sp. 90  
428305120 Crinalium epipsammum PCC 9333  
427713881 Synechococcus sp. PCC 6312

---KLSLHDINTGK-RFTQQANPDDC-KFICFASWRY--KYLKEL---  
---RVSLHVSVEGK-RLCQNAKQDI-KFLTNTYRTW--KYAN---  
---TEKAVSVSDANWKRLLGQCTAKKV-KLILRSTSLI-I-TAVKTARVASLSALK---  
---TEKQVSVSDADWKRLLGQCTAKKV-QLVTRSTGLI-IKATKVPVSPSETLCERVASLSGLKTLSPHPPARSL---  
---TEKQVSVSDANWKRLLGQIASSKV-QLIRRSNGLI-VA---  
---TEKQVSVSDNTNGQLRGLQIAVSKI-QLIRRSNGLI-VSH---  
---TKKQVSVSDANWKRLLGQIAFSKV-TLIRRSNGLI-VSY---  
---TKKQVSVSDANWKRLLGQIAVSKV-TLIRRSNGLI-VNC---  
---TKKQVSVSDANWKRLLGQIAVSKV-TLIRRSNGLI-VS---  
---TKKQVSVSDANWKRLLGQIAVSKV-TLIRRSNGLI-VFA---  
---TKQVSVSDDFGWRLLGQFSAKKT-QLLKRSTNLI-VNTQSGRAFPLSR---  
---TKNQVSVSGDFDKRLLGQFSAKKT-QLLKRSTNLI-VNTQSGRAFPLSR---  
---TKQVSVSDDFDKRLLGQFSAKKT-QLLKRSTNLI-VNTQSGRAFPLSR---  
---TKQVSVSDDFDKRLLGQFSAKKT-QLLKRSTNLI-VNTQSGRAFPLSR---  
---TKQVSVSDDFDKRLLGQFSAKKT-QLLKRSTNLI-VNTQSGRAFPLSR---  
---TARQVSVSDNCWKRLLGQFSASKV-QLLRATSTGLI-VSRLLVLLVNGVPSIA---  
---TQKQVSVSDLWKRLLGQFSASKV-QLLRATSTGLI-VSRLLVLLVNGVPSIA---  
TK-KAKSVSLYDHNWRRIGKFSVSKC-TLLRSTNGLI-VA---  
SE--VNKVMSLYDQWKRLLGQFSASKV-TLIRRSNGLI-VA---  
---TKKQVSVSDANWKRLLGQIASSKV-ILIRSTNGLI-VSH---

LYSPQ---LEKIV---GKTVYKPEEC-KRVLNRNEGIV-VMNSLYHN  
LYSPQ---LEKIV---GKTVYKPEEC-KRVLNRNEGIV-VMNSLYHS  
LYSPQ---LKKIV---GKMYVQPEEC-RQVLHNEGIV-VMNSLYHS  
LYSPQ---LKKIV---GKMYVQPEEC-RQVLHNEGIV-VMNSLYHS

IASHQ---GRTT---GITY---KFC-TAIOKQKGDYV-YEF  
FTTLD---GEKTRP-GYGL---TNL-TLVNRPQGLM-II  
PTTAN---GEKTRP-GYGL---TNL-TLVNRPQGLM-II  
FSTLK---GKIFR---GYGF---RNL-TLNRPKGLM-IV  
FSTLK---GKIFR---GYGF---RNL-TLNRPKGLM-IV  
LTDGL---GNVLLNNGKYNINGQCC-RLIMHNGNQ-KAEOKLSLYEFK  
LETIL---GDKVHASANIK---KNTVIRISARTTTLT-OLMEEAIPLCTKVPISILAVN  
IMDIF---GNTSKNPNVK---KNCRRISARCTTTLT-QQIQI  
IMDIF---GNTFKPNPNVK---KNCRRISARCTTTLT-QQIQI  
IMDIF---GNTFK---KNCRRISARCTTTLT-QQIQI  
ALKEL---KKVVK---VELLTPYKPKRGLV-CV  
ALKEL---KKVVK---VELLTPYKPKRGLV-CV

LRLLD---GTVISR-GKSY---KKI-ALKEKATSWL-VERSETVHIPPHE  
LRLLD---GKIHSA-SASH---KRL-DLIESATSML-KEVSS  
TGTLT---GEKISD-SVKY---TCL-RLVBEKAKTLM-FERREQRIFLHAEADGVSCAVL  
TGTLT---GEKISD-SVKY---TCL-RLVBEKAKTLM-FERREQRIFLHAEADGVSCAVL  
IRTLT---GEKIHSA-SASH---SNL-KLEKAKTLM-LESRMQIPLHNLNVCAGS  
LRLLD---GKIHSA-SASH---KKI-KRVEHASTLL-IRERKQDSSPTALA  
LRTIA---GFSIHK-SASY---KKL-TLEKAKTLM-VDIQSGEGRGRSQ  
LRTLA---GFSIHK-SASY---KKL-TLEKAKTLM-VDIQSGEGRGRSQ  
IRDLS---GNKVKSGSISC---KKL-EPTEPRKTVL-VERR  
IRKLD---GTVIHR-SAKS---KDL-ILVSKAKTLL-WERRENSAFSLPLPYP  
IRKLD---GTVIHR-SAKS---KDL-ILVSKAKTLL-WERRENSAFSLPLPYP

LRTAG---DGNF---EVSY---SKA-KLLHRPRGLA-YVPVW  
LRTAK---DDNF---EVSY---SKA-RLLHRPRGLA-YMPVW  
LRTAK---DDNF---EVSY---SKA-RLLHRPRGLA-YMPA  
LDCFN---GSKVD---GVNS---KYL-NLLQRGAGYS-YSPEDIA  
VKIDG---CRVS---QKM---EYLIRPMHRNDGYA-YSP  
LKDLS---GRRVC---GIAP---RHF-KLVQRFQDGRW-YEKFKAAALSSPHLKVAGSSAA  
LKDLS---GRRVC---GIAP---RHF-KLVQRFQDGRW-YEKFKAAALSSPHLKVAGSSAA

IRDAN---GKNIAQ---GISY---QVC-HIIOYQVGYK-YGRKRHILLHPSDAMDGVSCA  
IKDST---GNCCLQ---GVSW---KYM-QVLQRNSGW-YDEKERNPLLSQLK  
IKDST---GNCCLQ---GVSW---KYM-QVLQRNSGW-YDEKERNPLLSQLK  
IKDKT---GKRIVQ---SISY---KHC-KIQRQFDGYC-YELERIRISQTPPLQVBEVQASMQ  
IKNGT---KRIAQ---GINH---KYP-KLVQRFQDGYT-YQLDRNLNNSNTND-GRNSSHC  
IKNGT---KRIAQ---GINH---KYP-KLVQRFQDGYT-YQLDRNLNNSNTND-GRNSSHC  
ITSQR---LVTQ---GISY---QVC-RTLHRCDGYG-YGVYDITQIATQEQEDAGEAA  
ICPKG---RRKL---GTLK---SYVSRVHVQKDSYK-YRHLA  
IKAKA---GKIS---ANW---KNF-QLIQRDGYD-YGLLTV  
VKAKA---GKIS---ANW---KNF-KLIQRDGYD-YLSAV  
VKAKA---GKIS---ANW---KNF-KLIQRDGYD-YLSAV  
VKAKA---GKIS---ANW---KNF-KLIQRDGYD-YLSAV  
VKAKA---GKIS---ANW---KNF-KLIQRDGYD-YLSAV  
IKAKA---RKIS---ANW---KHF-KLIQRDGYD-YLSAV  
IKAKA---RKIS---ANW---KHF-KLIQRDGYD-YLSAV  
LQTSY---GPIK---TSW---KNL-CLLQRDGYD-YTQKEAGAPSTA  
IRTPH---GRAA---GIQH---TNI-RLLQRQDGYT-YTHQEPETRA  
IRTPH---GRAA---GIRH---TNI-RLLQRQDGYT-YTHQEQACA  
ITTRH---GRVA---GISH---RHV-RHLQRADGYG-YTRKEADRND  
ITTRH---GRVA---GISH---RHV-RHLQRADGYG-YTRKEADRND  
ITTPA---GVUQ---GISH---KHC-RIVQRNDGYG-YFFRHADLTQDANR

LNGFN---VHP---KYL-KVLQRQDGYG-YAME  
LNGVQ---DVHP---KYL-TLLQRNDGYG-YQIS  
IQTGI---AGATVQ---GISY---KHC-RIVQRADGYG-YSHRAQTKKCKNECALHTALSIPLGKAEVSRAI  
IQSAT---GLVQ---GIHH---RFC-TLLQRADGYG-YSWTRIAI  
IQAT---GLVQ---GIHH---RFC-TRIQCADGYG-YSWTKIASTQGEAGMRAAHAALSLPGLNPGVSRANG  
IQTGN---GLVQ---HIHY---RFC-KLVQRQDGYG-YHWSLLPMLNHLGIAEAGRNI  
INAAS---GLVS---GIHH---RFP-SLIQRADGYG-YSLTKIASTQGDAGRGRSVAALSLPGLNPGVSRANG  
IQTGN---GLVQ---HVHH---RFC-KLVQRADGYG-YAFTTRPQRQGLPHLWISKGS  
IQTD---ATVQ---GISY---RHC-RVLQRADGYG-YAFQPKPDAEKARRAA  
IQAPA---GTVQ---GIAY---RHC-CLLQRADGYG-YAFQPKPDAEKARRAA  
IQAQC---GTVQ---GVSY---RHC-RVLQRADGYG-YAFQPKPDAEKARRAA  
IQAQC---GTVQ---GVSY---RHC-RVLQRADGYG-YAFQPKPDAEKARRAA  
IQAQC---GTVQ---GVSY---RHC-RVLQRADGYG-YAFQPKPDAEKARRAA  
IQTRH---GLVQ---GVSH---RYC-TVVQRQDGYG-YSLVAKTDAITGTPKQGDALHPALYLPGLKAGVSRAN  
IQTRH---GLVQ---GVSH---RYC-TVVQRQDGYG-YQLVAKTDAITGTPKQGDASHALYLPGLKAEVSRANR  
IQTG---GGISGVQ---GISH---KHC-RVQRNDGYG-YFFNRADHTGREGVQPKASDAALHPALYLPAMNGVSRAI  
IQTGR---NGISGVQ---GISH---KHC-RVQRNDGYG-YFFNRADHTGREGVQPKASDAALHPALYLPAMNGVSRAI  
ITTPA---GVUQ---GISH---KHC-RIVQRNDGYG-YFFRHADLTQDANR  
ITTR---GVUQ---GIGH---KNC-RVQRNDGYG-YFFNRADHTGREGVQPKASDAALHPALYLPGLNPGVSRAS  
LQLPT---GKFD---VHP---KYL-KTIIHSDGYE-YQS  
IATKT---GRVT---GISH---RHC-TSIIHKKDGYS-YVF  
IASKS---GRVT---GISH---KNC-RVVRNDGYA-YEF  
IKTVE---LTVQ---GISH---KYC-QIITHGDGYL-YGL  
IVING---FRVE---FSTM---KDI-TKVCSDGYE-YV  
ISTAK---GVUQ---GINH---KYC-RQIHKKDGYS-YAT  
MRTPL---GKVS---PVRH---KYC-KSIIHNDGYM-YAFSTNVRPMNQRLA  
MMSPT---GKVS---PVRH---KYC-RATHNDGYT-YTLSTCVQ  
IASHQ---GRTT---GITY---KFC-TAIOKQKGDYV-YEF  
ISTAK---GLIQ---GISH---KYC-KTIIHKKDGYS-YGI  
ISTVQ---GLIQ---GISH---KYC-KTIIHKKDGYS-YAI  
ISAQR---GLIQ---GINY---KFC-KSIIHKKDGYS-YSS  
ISTQS---CLVQ---GISY---KAC-KHIIHKKDGYS-YGKSR  
ISTNS---GLVQ---GISH---KYC-LATHKKDGYS-YAN  
ISTVS---GLIQ---GISY---KYC-KSIIHKKDGYS-YGK  
IATWE---GRVA---GISH---KYC-KPDIHKKDGYS-YGF  
IATKS---GRVT---GISY---KCC-OPIQKDGYS-YAI  
ISTNN---GLVQ---GISH---KYC-SIIRKDGYS-YGFCDAEIRQVRLPVRVTSRPFYSRRFLDEKTRSH  
VTTQS---GRVS---GISH---RYC-OPIHRKDGYS-YAFSHTIGD  
ISASK---LVQ---GISY---KYC-KIIRKDGYS-YAF  
IATKS---GRVA---GISH---KFC-THIHRKDGYS-YAY  
IATAT---GRVA---GISH---KYC-KAMHKKDGYS-YVF



No 3

>4cnp\_A CAS9, crispr-associated endonuclease CAS9/Csn1; hydrolase, DNase, RNA-guided, immunity, crRNA, genome editin; 2.62A {Streptococcus pyogenes} PDB: 4cnp\_A
Probab=99.71 E-value=6.7e-18 Score=197.53 Aligned\_cols=196 Identities=20% Similarity=0.121 Sum\_probs=0.0

Q ss\_pred CCChhhhhhhhhhhhhhhhhhhhhhhhhC-----Cchheeeeeehhhhhc-----CCcccc--ceeeccccc
Q Thu\_Feb\_20\_16: 125 WLAPSLKHRVDTVLTWVNRRLRNLA---PLGSAIQELVRFDLQKIQ-----NPEISG--IYQQGELQ 182 (425)
Q Consensus 125 wL-PSi-----v-l-----Pi-i-E-v-fD-gk-----np-i-G---YQgg-l-g 182 (425)

T Consensus 732 --n-P-V-r-l-Q-kVvN-Iik--G--P--I-ELIAR-El--s-k-rk-----k-k-----e----- 810 (1372)
T 4cnp\_A 732 AGSPAIKKGLIQVVKVVDLELVKVMGRKHKEPNIIVEMAR-ENQTTQKQKNSRERMKRIIEGKIKELGSLKHPVENTQL 810 (1372)
T ss\_dssp SSSCHHHHHHHHHHHHHHHHHHHTTTCCCSSEEEEEEC-----CHHHHHHHHHHHHTTC-----CCCCGGG
T ss\_pred cCCHHHHHHHHHHHHHHHHHHHHHCCCCCEEEEEcC-CCcChHHHHHHHHHHHHHHHHHHHHcCCcchh

Q ss\_pred hHHHHHHHHhhCccccCccCce-----eEeecccccCCcChhhhhhhhhhhhhhhhhhhcCCHHHHHccCHHHHHH
Q Thu\_Feb\_20\_16: 183 YVREYLLKWKGRKCTYCGTKDVPL-----EVEHIIHPRSRGGTDRVSNLTMAACHACNQSKGNQDIRDFLFGKPELLQRIIL 257 (425)
Q Consensus 183 --vrey-l-k----C-yCg-----L---ev-HI-prs-gGsd--sNl-l-C--Cn--K-n-----fl-----l--i- 257 (425)

T Consensus 811 --K--Lw-eQ-gkc-YTG--I-i--L--yGIDHiP-S--DDS--NKVLv--N--K-n-tP-e-----w-l 890 (1372)
T 4cnp\_A 811 QNKELXYLYLQNGRDMYVDQELDNRLSDYDVIHVPSFIRKDDSDNKNVLTNRSDKNGKSDNVPSEEVVKMKMNYWRQL 890 (1372)
T ss\_dssp GSHHHHHHHHTTSBCTTTCCBCCHHHHHHHCEEESSCTTTCCCSGGGEEEC--CCTTTCSSSSCTTGGGHHHHHHH
T ss\_pred HHHHHHHHHCCCCCCCCCChhccCcCccceeecccccCccchhhhhcCHHHhhcCCCCHHHHHHHHHHHHHH

Q ss\_pred HhecCChh-----HHHHHHHH--HHHHHHhhC-----CEEEehhhhhhh
Q Thu\_Feb\_20\_16: 258 RKAKAPLKD-----AAVNSTRW--ALFNALKATG-----LPLTTGGQTKFN 299 (425)
Q Consensus 258 --k--lkd-----a-vn-tR-----l--Lk-----V--G--Tk-- 299 (425)

T Consensus 891 --is--K--L-----e-----Fi-RgL-DTryisK-----L-----Vv-vkG--Ts-l 970 (1372)
T 4cnp\_A 891 LNAKLITQRKFDNLTKAERGLSELDKAGFIRKQLVETRQITKHVAQILD SRMNTKYDENDKLIREVKVIITLKSklVDSF 970 (1372)
T ss\_dssp HHTTSSCHHHHHHH--CCCHHHHHHHHHHHCCCCCHHHHHHHHHHHHHHHHHHHHHCCCCBCTTSCBCCCCCEEECHHHHH
T ss\_pred HHHhhcCHHHHHHHHHhhccccchhhcchhhccCHHHHHHHHHHHHHHHHHHHhhccccccccCCCCEEEECHHHHH

Q ss\_pred hhhCccC-----ccccceeeccccc
Q Thu\_Feb\_20\_16: 300 RTRLDLPK-----AHWLDAAcVGQVDA 321 (425)
Q Consensus 300 R--g-L-K-----H--DA-cig--- 321 (425)

T Consensus 971 R--wgl-K-r--n--HHA-DA-lia--- 999 (1372)
T 4cnp\_A 971 RKDFQYKVRENNYHHAHDAYLVAVVGT 999 (1372)
T ss\_dssp HHHHTCCCTTTCCHHHHHHHHHHHHHHHHH
T ss\_pred HHHCCCCCCCCChHHHHHHHHHHcch

No 4

>COG3513 Predicted CRISPR-associated nuclease, contains McrA/HNH-nuclease and RuvC-like nuclease domain [Defense mechanisms]
Probab=99.48 E-value=3.6e-14 Score=154.15 Aligned\_cols=138 Identities=28% Similarity=0.304 Sum\_probs=0.0

Q ss\_pred hHHHHHHHHCCccccCc-----eEeecccccCCcChhhhhhhhhhhhhhhhhhhcCCHHHHcc-HHHHH
Q Thu\_Feb\_20\_16: 184 EYREYLLKWKGRKCTYCGTK-----DVPLEVEHIIHPRSRGGTDRVSNLTMAACHACNQSKGNQDIRDFLFGKPELLQ 254 (425)
Q Consensus 184 --vrey-l-k----C-yCg-----L---ev-HI-prs-gGsd--sNl-l-C--Cn--K-n-----fl-----l--i- 254 (425)

T Consensus 561 ilKLrLy-Q-gkmYsgqeI-I-rL-dk--eIDHi-P-Sr--DDS--NkVLv-s--Nq-KgnqtP-e--k-s--Wq 640 (1088)
T COG3513 561 ILKLRLLYLYQNGKCMYSGQEIDHILSDKYGYYEIDHIVPSQRTWDDSDNKNVLSSEENQKGNQTPYEFVKGKNSAKWQ 640 (1088)
T ss\_pred hHHHHHHHHcCccccCccccchccccceeecccccceeecccccceeeEEccccccccCCCCCHHHHHHHHHHHHH

Q ss\_pred HHHhhccCChh-----HHHHHHHH--HHHHHHhhC-----eEeechhhhhhh
Q Thu\_Feb\_20\_16: 255 RILRKAKAPLKD-----AAVNSTRW--ALFNALKATGLP-----LTTGTGGQTKFNR 300 (425)
Q Consensus 255 --i--k--lkd-----a-vn-tR-----l--Lk-----V--G--Tk--R 300 (425)

T Consensus 641 k---vL-s--tk-eR-l1--Dk--Fi-RnLndTryI-r-v-n-l--r1-l--d-n-k1--kv-v-t--g-lts-lR 720 (1088)
T COG3513 641 KLBAGVGLASQRPFTKAERILLQEYDKAGFIDRNLDTRYIARFVANYLKDRLNLSGDENTKLGSKVRVFTLKGQLTSLRL 720 (1088)
T ss\_pred HHHHHHHHHcCChHHHHHHHHhhcchhhcCHHHHHHHHHHHHHHHHHHHccccCCCCccccceEEEEchHHHHHH

Q ss\_pred hhcCcc-----ccccceeeccccc
Q Thu\_Feb\_20\_16: 301 TRLDLPK-----AHWLDAAcVGQVDA 321 (425)
Q Consensus 301 --g-L-K-----H--DA-cig--- 321 (425)

No 5

>2qgp\_A HNH endonuclease; Q39X46, GMR87, X-RAY, NESG, structural genomics, PSI-2, protein structure initiative; 2.60A {Geobacter metallireducens gs-15} PDB: 4h9d\_A
Probab=99.41 E-value=1.8e-13 Score=119.11 Aligned\_cols=60 Identities=28% Similarity=0.499 Sum\_probs=0.0

Q ss\_pred HHHHHHHCCccccCcCcc--eeEeecccccCCcChhhhhhhhhhhhhhhhhhhcCCHHHH
Q Thu\_Feb\_20\_16: 186 REYLLKWKGRKCTYCGTKDVPL-----LEVEHIIHPRSRGGTDRVSNLTMAACHACNQSKGNQDIRDF 245 (425)
Q Consensus 186 rey-l-k----C-yCg-----L---ev-HI-prs-gGsd--sNl-l-C--Cn--K-n-----f 245 (425)

T Consensus 27 --C-Y-g-----i-----iDHiIP-s-gg-----Nlv--C--CN--K--p-e 88 (112)
T 2qgp\_A 27 QWKNRIARGICHYCGEIPPEELTMDHLVPPVVRGKSTRGNVVPACKBKNRKYLLPVFW 88 (112)
T ss\_dssp HHHHHHHHTBCTTTCCBCGGGEEEEEESTTTCCSTTTEEEHHHHHHHHHTCCSHHH
T ss\_pred HHHHHHHHHCCCCCCCCCccccceeecccccEEECcCHHHHHHHHHHHcCCHHHH

No 6

>PF13395 HNH\_4: HNH endonuclease
Probab=99.23 E-value=4.6e-12 Score=96.76 Aligned\_cols=46 Identities=50% Similarity=0.959 Sum\_probs=0.0

Q ss\_pred cccccCcCce-----eEeecccccCCcChhhhhhhhhhhhhhhhhhhcCCH
Q Thu\_Feb\_20\_16: 197 CTYCGTKDVP-----EVEHIIHPRSRGGTDRVSNLTMAACHACNQSKGNQDI 242 (425)
Q Consensus 197 C-yCg-----L-----ev-HI-prs-gGsd--sNl-l-C--Cn--K-n----- 242 (425)

T Consensus 1 C-Y-g-----l-----iDHiIP-s-----Nlv-----N-k-K--k-P 53 (54)
T PF13395\_consen 1 CPYCGKPISEINLFKKNKYEIDHIIPRSRGGDSFVNLVLCCKENRSGKNTPT 53 (54)
T ss\_pred CCCCCCHhhcccCceEEEEcccccCCcChhhhhcCHHHHHccccccC

No 7

>PF01844 HNH: HNH endonuclease PDB: 2QGP\_C.
Probab=99.12 E-value=2.7e-11 Score=88.50 Aligned\_cols=44 Identities=41% Similarity=0.954 Sum\_probs=0.0

Q ss\_pred cccccCcC--CceeEeecccccCCcChhhhhhhhhhhhhhhhhhhcC
Q Thu\_Feb\_20\_16: 197 CTYCGTKD-----VPLEVEHIIHPRSRGGTDRVSNLTMAACHACNQSKGNQ 240 (425)
Q Consensus 197 C-yCg-----L-----ev-HI-prs-gGsd--sNl-l-C--Cn--K-n----- 240 (425)

T Consensus 1 C--C-----v-Hi-----gg-----Nl--lC--Ch--k--k 47 (47)
T PF01844\_consen 1 QYCGKPGSDNESLHVHHIIPRSKGGKNDLENLILCPSCCHRKHDK 47 (47)
T ss\_dssp -TTT--B--GG-EEEEESS-TTTT--STTTEEEHHHHHHHH--
T ss\_pred CCCCCcCcCceEEECcChhccccCCCCCHHHHHHHHHHHHHhcc



No 8

>COG1403 McrA Restriction endonuclease [Defense mechanisms]

Probab=98.76 E-value=5.4e-09 Score=91.49 Aligned\_cols=61 Identities=36% Similarity=0.641 Sum\_probs=0.0

Q ss\_pred hHHHHHHHHHCCccccCCc--CCeeEeecccccCCcchhhhhhhhhhhhhccCCHHHH
Q Thu\_Feb\_20\_16: 184 EVREYLLKWKGRKCTYCGTK--DVPLEVEHIIHPRSRGGTDRVSNLTMAACHACNQSKGNQDIRDF 245 (425)
Q Consensus 184 ~vrey-l-k-----C-yCg-----Lev-HI-prs-gGsd--sNl-l-C--Cn--K-n-----f 245 (425)

No 9

>PF14279 HNH\_5: HNH endonuclease

Probab=97.05 E-value=0.00038 Score=56.63 Aligned\_cols=39 Identities=38% Similarity=0.837 Sum\_probs=0.0

Q ss\_pred cccccCCcCcee--EeecccccCCcchhhhhhhhhhhhhhhc
Q Thu\_Feb\_20\_16: 197 CTYCGTKDVPLE--VSHIHPRSRGGTDRVSNLTMAACHACNQSKG 238 (425)
Q Consensus 197 C-yCg-----Le-v-HI-prs-gGsd-----sNl-l-C--Cn--K-n-----f 238 (425)

No 10

>PF13391 HNH\_2: HNH endonuclease

Probab=96.99 E-value=0.0006 Score=53.06 Aligned\_cols=44 Identities=27% Similarity=0.269 Sum\_probs=0.0

Q ss\_pred cccccCCc----CceeEeecccccCC--CCc-----chhhhhhhhhhhhhhhc
Q Thu\_Feb\_20\_16: 197 CTYCGTKD---VPLEVEHIIHPRSRG--GTD-----RVSNLTMAACHACNQSKGNQ 240 (425)
Q Consensus 197 C-yCg-----Lev-HI-prs-g-Gsd-----sNl-l-C--Cn--K-n-----f 240 (425)

No 13

>1e71\_A GP49, recombination endonuclease VII; resolvase, holliday junction, DNase; HET: SO4; 1.32A {Bacteriophage

T4} SCOP: a.140.4.1 d.4.1.5 PDB: 2qnc\_A\* len7\_A 1e7d\_A 2qnf\_A\*

Probab=91.18 E-value=0.29 Score=45.98 Aligned\_cols=53 Identities=19% Similarity=0.421 Sum\_probs=0.0

Q ss\_pred hHHHHHHHHHCCccccCCc---CCeeEeecccccCCcchhhhhhhhhhhhhhhc
Q Thu\_Feb\_20\_16: 184 EVREYLLKWKGRKCTYCGTK---DVPLEVEHIIHPRSRGGTDRVSNLTMAACHACNQSKG 238 (425)
Q Consensus 184 ~vrey-l-k-----C-yCg-----Lev-HI-prs-gGsd--sNl-l-C--Cn--K-n-----f 238 (425)

No 16

>1hjr\_A Holliday junction resolvase (RUVVC); site-specific recombinase; 2.50A {Escherichia coli} SCOP: c.55.3.6

Probab=87.67 E-value=1.5 Score=40.99 Aligned\_cols=41 Identities=22% Similarity=0.353 Sum\_probs=0.0

Q ss\_pred EEEEECCCCcEEEEEECC---EEEEEEEEcChHHHHHHHH
Q Thu\_Feb\_20\_16: 56 LEKLDPGSKVTGIAIKQGN---KIIFGAEIQRHGQ-QIKDALLS 96 (425)
Q Consensus 56 i-lgidPg-k--G-av-----l---el-r---vk-l--- 96 (425)

No 17

>PF02075 RuvC: Crossover junction endodeoxyribonuclease RuvC; PDB: 1HJR\_A.

Probab=87.43 E-value=1.4 Score=40.65 Aligned\_cols=40 Identities=23% Similarity=0.387 Sum\_probs=0.0

Q ss\_pred EEEEECCCCcEEEEEECC---EEEEEEEEcChHHHHHHHH
Q Thu\_Feb\_20\_16: 57 LEKLDPGSKVTGIAIKQGN---KIIFGAEIQRHGQ-QIKDALLS 96 (425)
Q Consensus 57 -lgidPg-k--G-av-----l---el-r---vk-l--- 96 (425)

No 18

>4ep4\_A Crossover junction endodeoxyribonuclease RUVVC; resolvase, hydrolase; 1.28A {Thermus thermophilus} PDB:

4ep5\_A

Probab=86.99 E-value=1.3 Score=41.83 Aligned\_cols=41 Identities=17% Similarity=0.267 Sum\_probs=0.0

Q ss\_pred EEEEECCCCcEEEEEECC---EEEEEEEEcChHHHHHHHH
Q Thu\_Feb\_20\_16: 56 LEKLDPGSKVTGIAIKQGNKI-----IFGAEIQRHGQ-QIKDALLS 96 (425)
Q Consensus 56 i-lgidPg-k--G-av-----l---el-r---vk-l--- 96 (425)



A

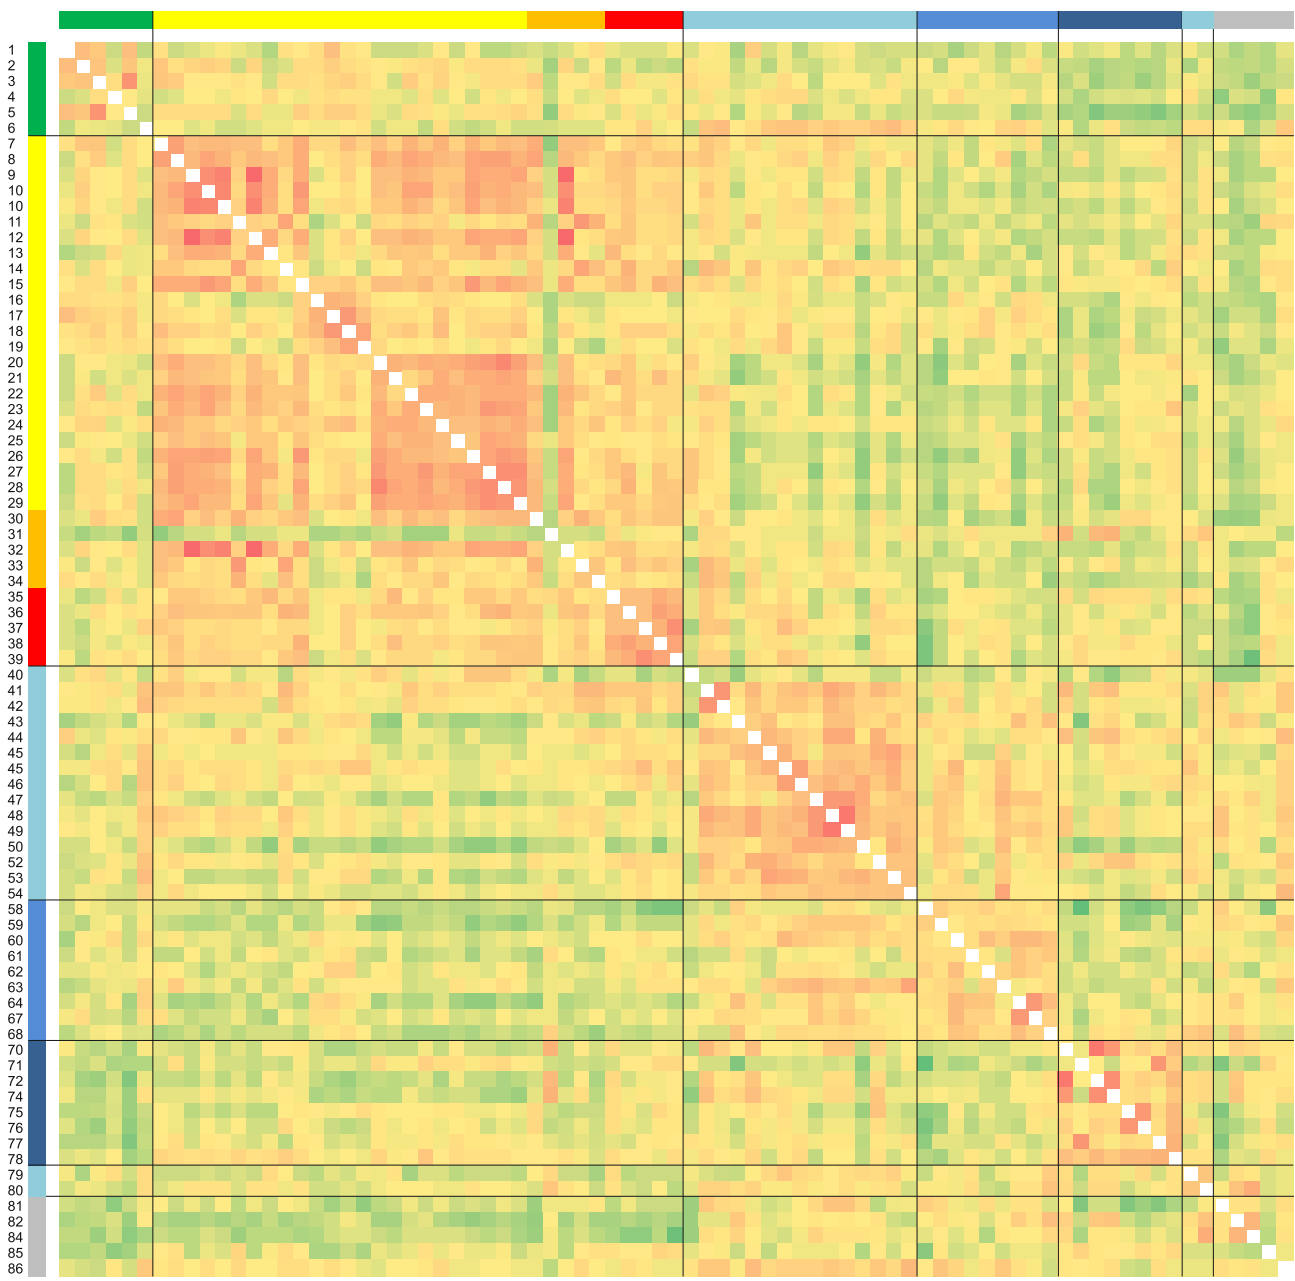

**B**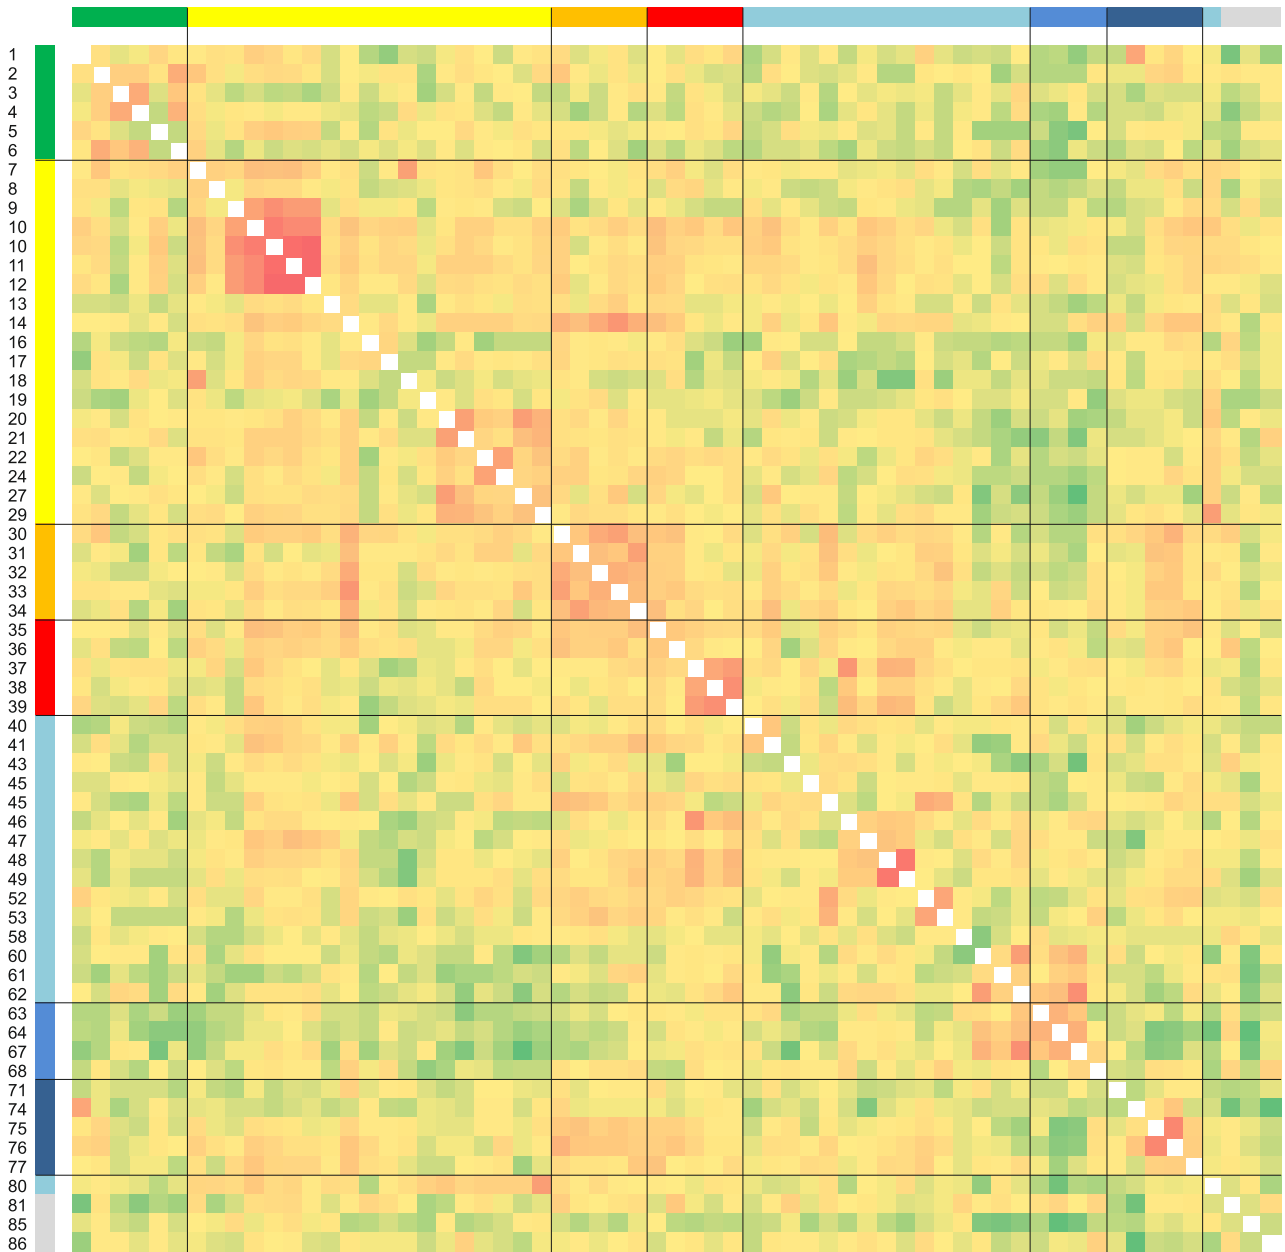

**Supplementary Figure S9. CRISPR repeats and tracrRNA orthologs pairwise identity.** (A) Sequence identity of each type II CRISPR repeat pair is represented with a color scale from green (lowest) to red (highest identity). The repeat sequences are ordered according to the corresponding Cas9 sequences on the Cas9 phylogenetic tree. The numbers on the left indicate the exact position on the tree. Color bars on the top and left correspond to the colors of Cas9 tree clusters. (see Figure 4 and Supplementary Table S1) Note the high similarity of the repeat sequences belonging to the same, large clusters of the Cas9 tree. (B) Sequence identity of every tracrRNA sequence pair is represented with a color scale from green (lowest) to red (highest identity). The tracrRNA sequences are ordered according to the corresponding Cas9 sequences on the Cas9 phylogenetic tree and the numbers on the left indicate the exact position on the tree. Color bars on the top and left correspond to the colors of the Cas9 tree clusters (see Figure 4 and Supplementary Table S1). Note that tracrRNA sequences show higher similarity only in small clusters of closely related loci.

## Type II-B

*F. novicida* 3523

GUUUCAGUUAACUAGAUUAUCUGAUUAACUA-UCUUAG  
GUUUCAGUAGCUAGAUUAUUUGUACAUAACUAGUGUU  
UUUUCGUAAUUAGGUUAUUUGAUUAACUGCUUCAA  
AUUUUAGCGGUUAUAUUUAUCUGAUUAACUUACCCAG  
GUUUCGGUAGCUAGGUUAUUUGAUGUACAAUAAAAAC  
UUUAUAAGUAGCUAGAUUAUUUGAUUAACUGCUGUUAG  
GUUUCAGUAGCUAGAUUAUUUGAUUAACUGCUGUUAG

*F. novicida* U112 and Fx1

UUUUUAGUAAACUAGACUAUUUUAUAACUA-UGUUAG  
GUUUCAGUUGUUAGAU-UAAUUUGGUAUGUACUUGUGUU  
UUUUUAUUUUUGAAU-GCUUUGGUAGUAUGUUGAGAU  
GUUUUCGUGAUUAUAU-UAAUUUGAUACAAUGUGUCCAA  
GUUUCAGUUGCUGAAU-UAAUUUGGUAACUACUGUUAG

Gammaproteobacterium HTCC5015

AUAACAAGGGAGUAUUUGCUGGAAUAAGCUCUGAAAC  
GUUUCAGCUGUUGGUUUUGUUGGGAAUAAGCUCUGAAAC

Distance from 1<sup>st</sup> repeat: 55 nt instead of ~33 nt spacer

*Wolinella succinogenes* DSM1740

UUUGUUAAGCUGGAUGGGAAUUAUAAGAGUGUUGC  
GUUUCACAGGCUAAGCGGAUUUGCUAUAAGUGUUGC

Distance from 1<sup>st</sup> repeat: 37 nt, like other spacers (~33-37 nt)

*Legionella pneumophila* str. Paris

AUUUCAUUAGUUAAAUUUUUAGAUGAGGGAAUUAUUGG  
GUUUCAGUGGUUGGAUUUUUAGAUGAGGGAAUUAUUGG

Distance from 1<sup>st</sup> repeat: 38 nt, like other spacers (~34-36 nt)

*Sutterella wadsworthensis* 3\_1\_45B

GUUUCAGCGCUUUAGCUUGCAGCGUUAUGAUCUCUAU  
GUUUCAGUGCUAUAAGCUCGUAGCGUUAUGAUCUUCGC

Distance from 1<sup>st</sup> repeat: 38 nt, like other spacers (~33-39 nt)

## **Type II-A**

*Streptococcus pyogenes* M1 GAS

GUUUUAGAGCUAUGCUGUUUUGAAUGGUC CCAAAC  
GUUUUAGAGCUAUGCUGUUUUGAAUGGUC **UCCAUC**

*Streptococcus thermophilus* LMD-9

GUUUUUGUACUCUCAAGAUUUUAAGUAACUGUACAAC  
GUUUUUGUACUCUCAAGAUUUUAAGUAACUGUACAGU

*Treponema denticola* ATCC 35405

GUUUGAGAGUUGUGUAAUUUAAGAUGGAUCUCAAAAC  
GUUUGAGAGUUGUGUAAUUUAAGAUG **ACAACCAAGC**

## **Type II-C**

*Neisseria meningitidis* Z2491

GUUGUAGC **GCCCA** AUUCUCAUUUCGCAGUGCUACAAU  
GUUGUAGCUC C C U U U C U C A U U U C G C A G U G C U A C A A U

*Campylobacter jejuni* subsp. *jejuni* NCTC 11168

**A**UUUUAGUCCCUUUUUAAA UUCUUUAUGGUAAAAU  
GUUUUAGUCCCUUUUUAAA UUCUUUAUGGUAAAAU

*Candidatus Puniceispirillum marinum* IMCC1322

**U**GGGGGUAGGCUCUCAAU CACCAGAGUGCUAUACU  
GUUGCUCUAGGCUCUCAAU CACCAGAGUGCUAUACU

**Supplementary Figure S10. Degenerated repeats of type II CRISPR-Cas.** Black: consensus repeat sequence; red: degenerated repeat sequence; yellow highlighted: scaRNA repeat. Nucleotides mutated in the degenerated repeats are highlighted in grey. For every strain, the repeats are listed in the direction of 5' to 3' end of the CRISPR array. For the type II-B, the degenerated repeat distance from the first, regular repeat in the array is given. Note that unlike type II-B, type II-A and II-C repeats display a lower amount of mutations and their distribution are typically at one of the repeat ends.

**A**

|                                            |                                                                                                   |
|--------------------------------------------|---------------------------------------------------------------------------------------------------|
| <i>Streptococcus pyogenes</i><br>SF370     | GUUUUAG--AGCUAUGCUGUUUUGAAUGGUCCAAAAAC<br>     •      <br>AAAUUGAACGAUACGACAAAACUUACCAAGGUUGUU    |
| <i>Listeria innocua</i><br>Clip11262       | GUUUUAG--AGCUAUGUUAUUUUGAAUGCUAAACAAAAAC<br>     •      <br>AAAUUGAACGAUACAAUAAAACUUAUGAUUGUUUAUA |
| <i>Streptococcus thermophilus</i><br>LMD-9 | GUUUUAG--AGCUUGUGUUUGGAAUGGUUCCAAAAAC<br>     •      <br>AAAUUGAGCGACACAACAAAGCUUACCAAGUUUUGG     |
| <i>Streptococcus mutans</i><br>UA159       | GUUUUAG--AGCUUGUGUUUGGAAUGGUUCCAAAAAC<br>     •      <br>AAAUUGAACGACACAACAAAGCUUACUUAAGGUUGUG    |

**B**

|                                        |                                                                                             |
|----------------------------------------|---------------------------------------------------------------------------------------------|
| <i>Neisseria meningitidis</i><br>Z2491 | GUUGUAGCUCUUUCUCAUUUCGAGUCUACAAU<br>•             <br>UAACAUCGUUGCCAAGAGUAAAGCGUCACGCUGUUA  |
| <i>Pasteurella multocida</i><br>Pm70   | GUUGUAGUUCUUUCUCAUUUCGAGUCUACAAU<br>•     •        <br>UAACAUCGUUGCAGAGAGUAAAGCGUCACGUUGUUA |

**C**

|                                            |                                                                                                      |
|--------------------------------------------|------------------------------------------------------------------------------------------------------|
| <i>Enterococcus faecalis</i><br>TX0012     | GUUUUUGUAC--UCUCAUAAUUUCUUAUCAGUAAAAAC<br>•             <br>UAAAAACAUCUAAGAGUUAUUAAGAAUAGUCAUUUUA    |
| <i>Eubacterium rectale</i><br>ATCC 33656   | AUUUUAGUA-A-CUGAAUAAUUUACGUGACUGUAAAAAC<br>             <br>AAAUCAUCUAGACUUUUUAAAUGCACUGAUUUUUUA     |
| <i>Streptococcus thermophilus</i><br>LMD-9 | GUUUUUGUA-CU-CU-CAAGAUUUUAGUUAACUGUAACAAC<br>••             <br>UAGAAACAUCGAAGACGUUCUAAAUUCAUUGACACA |

**D**

|                                                                  |                                                                                                               |
|------------------------------------------------------------------|---------------------------------------------------------------------------------------------------------------|
| <i>Eubacterium yurii</i> subsp. <i>margaretiae</i><br>ATCC 43715 | GUUUGAG-A-ACCUUGUAAAUCAUUAAGUAUGUAAAAC<br>     •      <br>CAAACUUGAGUGGAACAUUUAGUUACUUAUAC-UUAU               |
| <i>Solobacterium moorei</i> F0204                                | GUUUGAG-A-ACUUAUGUAAAUAU---GCUGGUA---GCAAAAAC<br>     •      <br>CAAACUUGAAUGAUACAUUUAUAGAAUGACCAUAUUCUGUUAAG |

**Supplementary Figure S11. Compensatory mutations within CRISPR repeat:tracrRNA duplexes suggest coevolution of type II CRISPR-Cas RNA components.** Basepairings: upper sequence, repeat (5' to 3' orientation); lower sequence, tracrRNA antirepeat (3' to 5' orientation). Highlighted are nucleotides different from the corresponding ones in top duplexes for every panel. Color bars indicate clusters of Cas9 tree of selected loci (see Figure 4). (A, B) RNAs associated with very closely related Cas9 orthologs (same BLASTclust group, see Supplementary Materials and Methods and Supplementary Table S1). (C, D) RNAs associated with Cas9 orthologs from the same Cas9 phylogenetic tree

cluster but from different BLASTCLUST groups. Note the conservation of the cofolding pattern in **(A, B, C)** and 5' part of **(D)**. The conserved structure at the 5' part of the repeat in **(D)** is most likely present in mature crRNA:tracrRNA duplex. Note, that bacterial strains in **(C)** belong to different families (*Bacilli* and *Clostridia*) and in **(D)** to different phyla (*Firmicutes* and *Tenericutes*).



*F. novicida* U112 CAACGCTAGTTGTTCCCATGCCATCCATTTAAGTTGATGTTTCACTAAATTCTTAATCCAAAACGAAATATAATTTTGCT-ATAACTATTATAACAAATAATCATTAACTAACTGTATAAACTAATAAAAAAATACTTTAAAAAGA  
*F. novicida* Fx1 CAACGCTAGTTGTTCCCATGCCATCCATTTAAGTTGATGTTTCACTAAATTCTTAATCCAAAACGAAATATAATTTTGCT-ATAACTATTATAACAAATAATCATTAACTAACTGTATAAAAGCTAATAAAAAAATACTTTAAAAAGC  
*F. novicida* 3523 CAACGCTGTTGTTTCCCATGCCATCCATTTAAGTTGATTTTCACTAAATTCTTAATCCAAAACGAAATATAATTTTGCTAATAGATATTATAACAAATAATCATTAACTAACTGTATAAAAGCTACTAAAAAATACTTTTAAAAAGC  
*F. holarctica* LVS -----  
*F. tularensis* SCHU S4 -----

*F. novicida* U112 TATTTTAAAGACCCTTTGTAGCTGGTTAGTTTGGAGATTTTATTATACTTTATAAACTGATAATCTCAATATTAGTTATGTTTACATTTTGTGTTAGCTATCGCGTTTATAGCAACCCCTATATGCTTTTATACTACTTTATTTTAG  
*F. novicida* Fx1 TATTTTAAAGACCCTTTGTAGCTGGTTAGTTTGGAGATTTTATTATACTTTATAAACTGATAATCTCAATATTAGTTATGATTACACTTTTGTGTTAGCTGTGCGTTTATAGCAACCCCTATATGCTTTTATACTACTTTATTTTAG  
*F. novicida* 3523 TATTTTAGAACTCTTTTA-TTTTGTAGTTTGGAGATTTTATTATACTCTATAAACTGATAATCTCAATATTAGTTATGATTACACTTTTGTGTTAGCTATGGTATTTATGGCACTTTATATCTATATACTACTTTATTTTAG  
*F. holarctica* LVS -----  
*F. tularensis* SCHU S4 -----

*F. novicida* U112 CTATTGTTAAGCTAATTGTAGCGATATATCATTTTAACTATTTTCTTAAAAATGATTCAAAAATTAATTAATTCATAAAATAAATGCTTAAAGCTATCAAACTTTGTTTGTCTATTTCTGAAAGTAGTATTTAGATAA-----  
*F. novicida* Fx1 CTATTTTAAAGCTAATTGTAGCGATATATCATTTTAACTATTTTCTTAAAACTGATTCAAAAATTAATTAATTCATAAAATAAATGCTTAAAGCTATCAAACTTTGTTTGTCTATTTCTGAAAGTAGTATTTAGATAA-----  
*F. novicida* 3523 CTATTATTAAGCTAATTGCAGCCATATATCATTTTGTAGCTATTATTTT---AACTGATTCAAAAA-TAATTAATCCATAAAATAAATGCTTAAAGCTCTTAACTTTGTTTACATAGCTCTTAGAATTAGGTTTTCATAAGCAAG  
*F. holarctica* LVS -----  
*F. tularensis* SCHU S4 -----

*F. novicida* U112 ----AATCTTATGAAAAATTA--TTTTAAATGAGT**TTTTAGTAACTAGACTATTTAATAAACTATGTTAG**AATTATCAAAGCAAATG-AAAAAGATTAGCTGTAA**GTTTCAGTTGTTAGATTATTTGGTATGTA**CTTGTGTTA-----  
*F. novicida* Fx1 ----AAGCTTATGAAAAATTA--TTTTAAATGAGT**TTTTAGTAACTAGACTATTTAATAAACTATGTTAG**AATTATCAAAGCAAATG-AAAAAGATTAGCTGTAA**GTTTCAGTTGTTAGATTATTTGGTATGTA**CTTGTGTTA-----  
*F. novicida* 3523 TAATGATCTTACTAATATTTATTTTAAATAAG-**TTTCAGT-TACTAGATTATCTGATATACTATCTTAG**GATTAGTCCAGCAAATGAAAAAGATTAGCTGTAA**GTTTCAGT**AGCTAGATTATTTGGTACATACTAGT**GTTA**TAGG  
*F. holarctica* LVS -----  
*F. tularensis* SCHU S4 -----

*F. novicida* U112 **GTTTAAAGTAGCT-----AGAAAATTCAC**TTTGTAGACCTAC-**TTATTTTTATTATTG**---AATGCTTT-GGTAGTATGTTGAGATCAACATTTGCTGTAAAAGT**GTTTCGTGATTATATTTTGTATACAATGTGTCCAAC**  
*F. novicida* Fx1 **GTTTAAAGTAGCT-----AGAAAATTCAC**TTTGTAGACCTAC-**TTATTTTTATTATTG**---AATGCTTT-GGTAGTATGTTGAGATCAACATTTGCTGTAAAAGT**GTTTCGTGATTATATTTTGTATACAATGTGTCCAAC**  
*F. novicida* 3523 GTTAGGATTAACCTAACATATAAAGAACAATTAGCTGTAA**TTTCGTTAATTAGGTTATTTGATATACTGCTTTCAA**TACTGTACTGAATTGATATTTGCTATATAACT**ATTTAGCGGTTATATATCTGATATACTTTACCAGA**  
*F. holarctica* LVS -----  
*F. tularensis* SCHU S4 -----

*F. novicida* U112 TAGAACTTTTAGGAATAATTACAAAATTAATTAA-----  
*F. novicida* Fx1 TAGAACTTTTAGGAATAATTACAAAATTAATTAA-----  
*F. novicida* 3523 TAGAACTTCTAAATATTATTTCGTAATAATTAA**GTTTCGGTAGCTAGGTTATTTGATGTACAATAAAAAA**CTTACCTGTTGATGCTAGGTATTAGTGTAT**TTATAAGTAGCTAGATTATTTGATATACTGCTGTTAG**GGTATGACA  
*F. holarctica* LVS -----  
*F. tularensis* SCHU S4 -----

*F. novicida* U112 -----GTTTCAGTTGCTGAATTATTTGGTAACTACTGTTAGACAATGGCAAGCTTGATTACTTTTATAGTGTGAT---GTTTCAGTTGCTGAATTATTTGGTAACTACTGTTAGAAAGGATTTAATAC  
*F. novicida* Fx1 -----GTTTCAGTTGCTGAATTATTTGGTAACTACTGTTAGCTTTAACTCATCAAAATTCACAAATCACCTATTAAG**GTTTCAGTTGCTGAATTATTTGGTAACTACTGTTAGATCAAAATCGACAG**  
*F. novicida* 3523 ATGACTATAACCAACACTCGTCCAGAGTTTCAGTAGCTAGATTATTTGATATACTGCTGTTAGTTTCTTAATCTTAGGGTATCTAAATACAAATCTCT**GTTTCAGTAGCTAGATTATTTGATATACTGCTGTTAG**AATAAGCATTCA  
*F. holarctica* LVS -----  
*F. tularensis* SCHU S4 -----

*F. novicida* U112 CTTAAAATTATCCAAATTTATATGTTTCAGTTGCTGAATTATTTGGTAAACTACTGTTAGTGCCTAATCCTCAGCAGCAACACTTAATTCAGAATGTTTCAGTTGCTGAATTATTTGGTAAACTACTGTTAGTTACACATTCAGCTGGT  
*F. novicida* Fx1 TAAATACATATATGAGAAGCT--GTTTCAGTTGCTGAATTATTTGGTAAACTACTGTTAGTAACGTTTGGAAATAAGTCTACATTTCTTTATT--GTTTCAGTTGCTGAATTATTTGGTAAACTACTGTTAGATACAATCTTGTATTA  
*F. novicida* 3523 AGATATTTTATTTAATTTTTAT--GTTTCAGTAGCTAGATTATTTGATATACTGCTGTTAGTCTAATGTAGAAGCTATATTTATCTATTTTCACAATT--GTTTCAGTAGCTAGATTATTTGATATACTGCTGTTAGCTGGTGGAGCGGTC  
*F. holarctica* LVS -----  
*F. tularensis* SCHU S4 -----

*F. novicida* U112 TCCTTAGCATTATT--AACGTTTCAGTTGCTGAATTATTTGGTAAACTACTGTTAGTAATAGCCAATGCTTTTAAACTACTGATATATACGTTTCAGTTGCTGAATTATTTGGTAAACTACTGTTAGGCAATGACAGAAAACAGCACA  
*F. novicida* Fx1 TGAGAGAGACAGATCCAACGTTTCAGTTGCTGAATTATTTGGTAAACTACTGTTAGTAACGTTTGGAAATAAGTCTACATTTCTTTATT--GTTTCAGTTGCTGAATTATTTGGTAAACTACTGTTAGGCAATGACAGAAAACAGCACA  
*F. novicida* 3523 ACTGGCGCGAGGGTGA--GTTTCAGTAGCTAGATTATTTGATATACTGCTGTTAGAGTGTGAAACTTCAAGCCTGTTGTTGAAACGG--GTTTCAGTAGCTAGATTATTTGATATACTGCTGTTAGATAATATGCTTAACATATGT  
*F. holarctica* LVS -----  
*F. tularensis* SCHU S4 -----

*F. novicida* U112 GATAATAAAAACTAGTTTCAGTTGCTGAATTATTTGGTAAACTACTGTTAGCTATAGGGTTACCTATCTTTTGGAGTGTGGCAAATAAGTTTCAGTTGCTGAATTATTTGGTAAACTACTGTTAGGTAATGGCAGGTTTTGTATGGTC  
*F. novicida* Fx1 -----  
*F. novicida* 3523 TTTCTAGCGATATT--GTTTCAGTAGCTAGATTATTTGATATACTGCTGTTAGTTAAGCCAGATAATGAATATCAAGAGTATGTCGA--GTTTCAGTAGCTAGATTATTTGATATACTGCTGTTAGCAATATGGAACGATTATGGGGAT  
*F. holarctica* LVS -----  
*F. tularensis* SCHU S4 -----

*F. novicida* U112 ATATAGGAGT--GTTTCAGTTGCTGAATTATTTGGTAAACTACTGTTAGACTATTTAAGATAACTCGACCAATATTTGACAAA--GTTTCAGTTGCTGAATTATTTGGTAAACTACTGTTAGATCTGGTGAAGATGTAATCGAAATTGAT  
*F. novicida* Fx1 -----  
*F. novicida* 3523 TGGTTAGATGAAGTTTCAGTAGCTAGATTATTTGATATACTGCTGTTAGCTATATGGGTTATAAAGTTCACCTCGAGCGTTAGTTTCAGTAGCTAGATTATTTGATATACTGCTGTTAGTGTCTATGAGCATTGCAGGCAAAACAAAT  
*F. holarctica* LVS -----  
*F. tularensis* SCHU S4 -----

*F. novicida* U112 CCGCTTAAAGTTTCAGTTGCTGAATTATTTGGTAAACTACTGTTAGCAGTCTTCGCAATGACACAACCAAGCCGCATAGTTTCAGTTGCTGAATTATTTGGTAAACTACTGTTAGGAGAGATATCTTAACTTTTGGTTTTTGGTTTTAC  
*F. novicida* Fx1 -----  
*F. novicida* 3523 AAAAAAAGTTTCAGTAGCTAGATTATTTGATATACTGCTGTTAGCTGCTGCCGATACGGGTACAATTCAGTTTATATGGTTTCAGTAGCTAGATTATTTGATATACTGCTGTTAGTGCCATACGATACAGCATATATTTCTTTTTAAT  
*F. holarctica* LVS -----  
*F. tularensis* SCHU S4 -----

*F. novicida* U112 CGTTTCAGTTGCTGAATTATTTGGTAAACTACTGTTAGGCGAGTGATTAGCAGTTGATATATACCAATCTTG-----  
*F. novicida* Fx1 -----  
*F. novicida* 3523 -GTTTCAGTAGCTAGATTATTTGATATACTGCTGTTAGACCAAAGCAACATTGCAATTGCAGATAGTGTGGTTTCAGTAGCTAGATTATTTGATATACTGCTGTTAGTTGTAGGCTGTAAAGGCTCAAAGGCTGTTATTACGTTTCAG  
*F. holarctica* LVS -----  
*F. tularensis* SCHU S4 -----

*F. novicida* U112 -----GTTTCAGTTGCTG  
*F. novicida* Fx1 -----GTTTCAGTTGCTG  
*F. novicida* 3523 TAGCTAGATTATTTGATATACTGCTGTTAGCCTCAACTTTAGCCTTAGGCTCAGTCTTTTTGGCGTTTCAGTAGCTAGATTATTTGATATACTGCTGTTAGTGTACTGGTTTTGCTGAAGGTGGTTACTGGCAAGTTTCAGTAGCTA  
*F. holarctica* LVS -----GTTTCAGTTGCTG  
*F. tularensis* SCHU S4 -----GTTTCAGTTGCTG

```

F. novicida U112      AATTATTTGGTAAACTACTGTTAGAGCCAAAACAAACCTAGTGTGTTGCAAGGCTTTGAGAGTTTTTAAATGGTATTTTTTCGCAAATACCCTAATTGTAACAAAAACGTAGACATTTGCGAAAAAATATCTAAAAATTATAAATGTACC
F. novicida Fx1      AATTATTTGGTAAACTACTGTTAGAGCCAAAACAAACCTAGTGTGTTGCAAGGCTTTGAGAGTTTTTAAATGGTATTTTTTCGCAAATACCCTAATTGTAACAAAAACGTAGACATTTGCGAAAAAATATCTAAAAATTATAAATGTACC
F. novicida 3523     GATTATTTGATATACTGCTGTTAGAGCCAAAGACAAACCTAGAGTTTGAAGGCTTTGAGAGAATTATTTGCTGGTGTTTTTTCGCAAATACCCTACTTGTAAAAAATGTAGACATTTGCGAAAAAATATCTAAAAATTAAAAGCGTACC
F. holarctica LVS   AATTATTTGGTAAACTACTGTTAGAGCCAAAACAAACCTAGTGTGTTGCAAGGCTTTGAGAGTTTTTAAATGGTATTTTTTCGCAAATACCCTAATTGTAACAAAAACGTAGACATTTGCGAAAAAATATCTAAAAATTATAAATGTACC
F. tularensis SCHU S4 AATTATTTGGTAAACTACTGTTAGAGCCAAAACAAACCTAGTGTGTTGCAAGGCTTTGAGAGTTTTTAAATGGTATTTTTTCGCAAATACCCTAATTGTAACAAAAACGTAGACATTTGCGAAAAAATATCTAAAAATTATAAATGTACC

F. novicida U112      AAATAATTAATGCTCTGTAATCATTTAAAAGTATTTGAACGGACCTCTGTTGACACGCTCGAATAACTAAAAAGCAAAAATTTGCCACCTAAGTGGCTTTTTTGTGTTGGCAATTAATATATCTTGTTCGCTTCTTAGCTCGAT-TAC
F. novicida Fx1      AAATAATTAATGCTCTGTAATCATTTAAAAGTATTTGAACGGACCTCTGTTGACACGCTCGAATAACTAAAAAGCAAAAATTTGCCACCTAAGTGGCTTTTTTGTGTTGGAAATTAATATAACTTGTTCGCTTCTTAGCTCGAT-TAC
F. novicida 3523     AAATAATCAATGCTCTGTAATCATTTAAAAGTATTTGACCGGACCTCTGTTGACACGCTCGAATAACT-AAAAGTAAAAATTTGCCACCTAAGTGGCTTTTTTGTGTTGGCAATTAATATATCTTGTTCGCTTCTTAGCTCGAT-TAC
F. holarctica LVS   AAATAATTAATGCTCTGTAATCATTTAAAAGTATTTGAACGGACCTCTGTTGACACGCTCGAATAACTAAAAAGCAAAAATTTGCCACCTAAGTGGCTTTTTTGTGTTGGCAATTAATATATCTTGTTCGCTTCTTAGCTCGAT-TAC
F. tularensis SCHU S4 AAATAATTAATGCTCTGTAATCATTTAAAAGTATTTGAACGGACCTCTGTTGACACGCTCGAATAACTAAAAAGCAAAAATTTGCCACCTAAGTGGCTTTTTTGTGTTGGCAATTAATATATCTTGTTCGCTTCTTAGCTCGAT-TAC

F. novicida U112      ATCAAGATGGC-TGAGAAATTTA-----ATATGGAGATTT-----CTAAATATTG---CGAGATTTCCACCTTCAGTGGCAATTAGA-----
F. novicida Fx1      ATCAAGATGGC-TGAGAAATTTA-----ATATGGAGATTT-----CTAAATATTG---CGAGATTTCCGCTTCAGTGACAATTAGA-----
F. novicida 3523     ATAAAAATGTCAAGCTAAATTTATTTTCAGCATCTCATTATAAATATAGATTTTATAAAAAAACATAATTACATAATTGATGACAAAATTTACTACTTTTATGCTAGCAGACTATATCTTTTACTTTATGATATCTTTTGTAGTTAAAA
F. holarctica LVS   ATCAAGATGGC-TGAGAAATTTA-----ATATGGAGATTT-----CTAAGTATTG---CGAGATTTCCGCTTCAGTGGCAATTAGA-----
F. tularensis SCHU S4 ATCAAGAAGGC-TGAGAAATTTA-----ATATGGAGATTT-----CTAAGTATTG---CGAGATTTCCGCTTCAGTGGCAATTAGA-----

F. novicida U112      -----GGTTTTACTA TCAACGATCATTACAAAAGTTGTAATATTCACATTGTATACATTGATGATCCGATGCAGATGA
F. novicida Fx1      -----GATTTTACTA TCAACGATCATTACAAAAGTTGTAATATTCACATTGTATACATTGATGATCCGATGCAGATGA
F. novicida 3523     TTATCTGACAAGCTCGAAGGAATTTGATT TAGCGATCATTACAGAAATTTAAATACTCACACTGTATACATTGATGATCCGATGCAGATGA
F. holarctica LVS   -----GATTTTACTA TCAACGATCATTACAAAAGTTGTAATATTCACATTGT-----TCCGATGCAGATGA
F. tularensis SCHU S4 -----GATTTTACTA TCAACGATCATTACAAAAGTTGTAATATTCACATTGT-----TCTGATGCAGATGA

```

**Supplementary Figure S12. Alignment of *Francisella* sp. CRISPR loci.** See Figure 6. *F. novicida* DNA sequence from the 3'-end portion of the radical SAM protein-encoding gene located upstream of the repeat-spacer array to the 5'-end portion of the *cas4* gene was aligned with the *F. holarctica* and *F. tularensis* region between *cas4* and the gene encoding the transposase inserted within the CRISPR locus using MUSCLE with manual corrections. Blue highlighted, 3'-end of the radical SAM protein-encoding gene; yellow highlighted, scaRNA; red letters, degenerated repeats; grey highlighted, repeats; red highlighted, tracrRNA; green highlighted, 5'-end of the *cas4* gene. See as well Supplementary Figure S9 for the degenerated repeat alignments.
